# Supplementary material
Source: Royal Society of Chemistry journal article supplement (doi:10.1039/d6qi00844e)
Supplement: d6qi00844e1.pdf [file d6qi00844e1.pdf]

# Prediction of Energies of Spin States for First Row Transition Metal Complexes: DFT vs Ligand Field Theory

Samuel Mace, Ben Grace, Alister Goodfellow, Martin A. Bates, Malcolm A.  
Halcrow, Paul H. Walton,\* Yingjian Xu, Bao N. Nguyen\*

E-mail: paul.walton@york.ac.uk;b.nguyen@leeds.ac.uk

Electronic supporting information

## Contents

|                                                     |          |
|-----------------------------------------------------|----------|
| <b>1 Datasets</b>                                   | <b>4</b> |
| 1.1 Spin state dataset ( <i>base_spin_dataset</i> ) | 4        |
| 1.1.1 Cr(II) Complexes                              | 4        |
| 1.1.2 Mn(II) Complexes                              | 5        |
| 1.1.3 Fe(III) Complexes                             | 6        |
| 1.1.4 Fe(II) Complexes                              | 7        |
| 1.1.5 Co(II) Complexes                              | 8        |
| 1.2 Spin-crossover dataset ( <i>T_SCO_dataset</i> ) | 8        |
| 1.2.1 Fe(II) complexes with $T_{SCO}$               | 8        |

|          |                                                                                                                                       |           |
|----------|---------------------------------------------------------------------------------------------------------------------------------------|-----------|
| <b>2</b> | <b>Prediction of Spin States with DFT</b>                                                                                             | <b>16</b> |
| 2.1      | General method . . . . .                                                                                                              | 16        |
| 2.1.1    | Energies of spin states . . . . .                                                                                                     | 17        |
| 2.1.2    | Analysis of optimised structures and their spin states . . . . .                                                                      | 40        |
| 2.1.3    | $\omega$ B97X-D2/def2-TZVP Results . . . . .                                                                                          | 42        |
| 2.1.4    | Spin Contamination Analysis . . . . .                                                                                                 | 43        |
| <b>3</b> | <b>Prediction of <math>T_{SCO}</math> with DFT methods</b>                                                                            | <b>45</b> |
| 3.1      | Thermodynamic results . . . . .                                                                                                       | 45        |
| 3.1.1    | Results with B3LYP . . . . .                                                                                                          | 45        |
| 3.1.2    | Results with M06-L . . . . .                                                                                                          | 48        |
| 3.1.3    | Results with PBE0 . . . . .                                                                                                           | 51        |
| 3.1.4    | Results with PBE0-D4 . . . . .                                                                                                        | 54        |
| 3.1.5    | Results with PBE0-D4 and acetone as solvent . . . . .                                                                                 | 56        |
| 3.1.6    | Results with PBE0-D4 and nitromethane as solvent . . . . .                                                                            | 58        |
| 3.1.7    | Results with TPSSh . . . . .                                                                                                          | 60        |
| 3.1.8    | Results with r <sup>2</sup> SCAN . . . . .                                                                                            | 63        |
| 3.2      | Analysis of optimised structures and prediction metrics . . . . .                                                                     | 65        |
| <b>4</b> | <b>Prediction of <math>T_{SCO}</math> with <i>Kestrel</i></b>                                                                         | <b>69</b> |
| 4.1      | <i>Kestrel</i> Software . . . . .                                                                                                     | 69        |
| 4.1.1    | Calculating $T_{SCO}$ with <i>Kestrel</i> . . . . .                                                                                   | 70        |
| 4.2      | Calculated $T_{SCO}$ using fixed ligand field parameters . . . . .                                                                    | 73        |
| 4.3      | Geometric dependence of calculated $T_{SCO}$ . . . . .                                                                                | 76        |
| 4.4      | Dependence of calculated $T_{SCO}$ on $e_\sigma$ parameter values . . . . .                                                           | 80        |
| 4.4.1    | Relationship between $e_\sigma$ and Hammett ( $\sigma$ ) values . . . . .                                                             | 82        |
| 4.4.2    | Calculated $T_{SCO}$ with $e$ parameters determined by Hammett ( $\sigma$ ) values<br>- PBE0/def2-TZVP optimised geometries . . . . . | 83        |

|          |                                                                                    |           |
|----------|------------------------------------------------------------------------------------|-----------|
| 4.4.3    | Calculated $T_{SCO}$ with $e$ parameters determined by Hammett ( $\sigma$ ) values |           |
|          | - PBE0-D4/def2-TZVP optimised geometries . . . . .                                 | 87        |
| <b>5</b> | <b>Prediction of spin states of catalytic intermediates with Kestrel</b>           | <b>88</b> |
| 5.1      | Fe(II)-catalysed silylation . . . . .                                              | 88        |
| 5.1.1    | TS1 parameter variation . . . . .                                                  | 89        |
| 5.2      | Fe(III)-catalysed oxidation of styrenes - ligation of $O_2$ . . . . .              | 90        |
| 5.2.1    | INT2 parameter variation . . . . .                                                 | 92        |
| 5.3      | Fe(III)-catalysed oxidation of styrene - ligation of olefin . . . . .              | 93        |
| 5.3.1    | TS3 parameter variation . . . . .                                                  | 94        |
| 5.3.2    | INT3 parameter variation . . . . .                                                 | 95        |

# 1 Datasets

## 1.1 Spin state dataset (*base\_spin\_dataset*)

### 1.1.1 Cr(II) Complexes

Table S1: Geometries and experimental spin states Cr(II) crystal structures.

| CCDC Identifier      | Coordination Number | Closest Point Group | Multiplicity |
|----------------------|---------------------|---------------------|--------------|
| CAMVER <sup>1</sup>  | 6                   | $O_h$               | 3            |
| CIDVOA <sup>2</sup>  | 6                   | $O_h$               | 5            |
| DUYZII <sup>3</sup>  | 4                   | $D_{4h}$            | 5            |
| GENZII <sup>4</sup>  | 6                   | $O_h$               | 3            |
| HIZNEJ <sup>5</sup>  | $2 \times \eta-5$   | $D_5$               | 3            |
| HUYWOO <sup>6</sup>  | 4                   | $D_{4h}$            | 5            |
| KAPPEW <sup>7</sup>  | 4                   | $D_{4h}$            | 5            |
| LESMAX <sup>8</sup>  | $2 \times \eta-5$   | $D_{5h}$            | 3            |
| OKIJUQ <sup>9</sup>  | 4                   | $D_{4h}$            | 5            |
| OWUTIL <sup>10</sup> | $3, \eta-5$         | $C_s$               | 3            |
| PIXXEE <sup>11</sup> | $2 \times \eta-5$   | $D_{5h}$            | 3            |
| SEBQIB <sup>12</sup> | 2                   | $D_{\infty h}$      | 5            |
| JARJOC <sup>13</sup> | 2                   | $D_{\infty h}$      | 5            |
| SOFXAM <sup>14</sup> | 4                   | $D_{4h}$            | 5            |
| SOFXIU <sup>14</sup> | 6                   | $O_h$               | 5            |
| UDURUJ <sup>15</sup> | 4                   | $D_{4h}$            | 5            |
| VAZWAU <sup>16</sup> | 6                   | $O_h$               | 5            |
| YALPEG <sup>17</sup> | $2 \times \eta-5$   | $D_5$               | 3            |

### 1.1.2 Mn(II) Complexes

Table S2: Geometries and experimental spin states Mn(II) crystal structures.

| CCDC Identifier      | Coordination Number | Closest Point Group | Multiplicity |
|----------------------|---------------------|---------------------|--------------|
| AXUMEL <sup>18</sup> | 7                   | $C_s$               | 2            |
| AZULIQ <sup>19</sup> | 6                   | $O_h$               | 6            |
| BIKZUQ <sup>20</sup> | 6                   | $O_h$               | 6            |
| BUBGEL <sup>21</sup> | $2 \times \eta-5$   | $D_{5h}$            | 6            |
| BUBGUB <sup>21</sup> | $2 \times \eta-5$   | $D_5$               | 6            |
| BUSMOR <sup>22</sup> | 4                   | $T_d$               | 6            |
| CAZZUY <sup>23</sup> | 4                   | $T_d$               | 6            |
| CEBBAM <sup>23</sup> | 6                   | $O_h$               | 2            |
| EQEGEN <sup>24</sup> | 6                   | $O_h$               | 6            |
| GIQMUO <sup>25</sup> | 6                   | $O_h$               | 6            |
| HEVCEQ <sup>26</sup> | 6                   | $O_h$               | 6            |
| IKEQUK <sup>27</sup> | 6                   | $O_h$               | 6            |
| IMAFEH <sup>28</sup> | 6                   | $O_h$               | 4            |
| KASNUQ <sup>29</sup> | 6                   | $O_h$               | 6            |
| KEYPIT <sup>30</sup> | 6                   | $O_h$               | 6            |
| MNPHCY <sup>31</sup> | 4                   | $D_{4h}$            | 4            |
| NUYZIS <sup>32</sup> | 4                   | $T_d$               | 6            |
| ODIZEG <sup>33</sup> | $2 \times \eta-5$   | $D_5$               | 2            |
| OKUXUO <sup>34</sup> | 5                   | $C_{4v}$            | 6            |
| QABBAA <sup>35</sup> | 4                   | $T_d$               | 6            |
| SEWMUC <sup>36</sup> | 6                   | $O_h$               | 6            |
| SUTWOT <sup>37</sup> | 6                   | $O_h$               | 6            |
| TAWFUT <sup>38</sup> | 6                   | $O_h$               | 6            |
| TOGPEK <sup>39</sup> | 4                   | $D_{4h}$            | 6            |
| TUSBIT <sup>40</sup> | 7                   | $C_s$               | 6            |
| VAQDUM <sup>41</sup> | 6                   | $O_h$               | 6            |
| VEBJOB <sup>42</sup> | $2 \times \eta-5$   | $D_5$               | 6            |
| XAKDOE <sup>24</sup> | 6                   | $O_h$               | 6            |
| XAMWEP <sup>43</sup> | 4                   | $T_d$               | 6            |
| ZIMGIL <sup>44</sup> | 6                   | $O_h$               | 6            |

### 1.1.3 Fe(III) Complexes

Table S3: Geometries and experimental spin states Fe(III) crystal structures.

| CCDC Identifier         | Coordination Number     | Closest Point Group | Multiplicity |
|-------------------------|-------------------------|---------------------|--------------|
| CALGAX <sup>45</sup>    | 6                       | C <sub>4v</sub>     | 6            |
| CELVEU <sup>46</sup>    | 5                       | C <sub>4v</sub>     | 6            |
| CEQPOF <sup>47</sup>    | 1, $\eta$ -3, $\eta$ -5 | S                   | 2            |
| ELIRUN <sup>48</sup>    | 5                       | C <sub>4v</sub>     | 6            |
| EXUBIK <sup>49</sup>    | 6                       | O <sub>h</sub>      | 6            |
| FEACAC <sup>50</sup>    | 6                       | O <sub>h</sub>      | 6            |
| FONNAZ <sup>51</sup>    | 6                       | O <sub>h</sub>      | 6            |
| GEDTUE <sup>52</sup>    | 5                       | C <sub>4v</sub>     | 4            |
| KANYUT <sup>53,54</sup> | 5                       | C <sub>4v</sub>     | 6            |
| KIKBOV <sup>55</sup>    | 4                       | T <sub>d</sub>      | 6            |
| LUJNOV <sup>56</sup>    | 5                       | C <sub>4v</sub>     | 6            |
| MOPDUQ <sup>57</sup>    | 6                       | O <sub>h</sub>      | 6            |
| OETPFE <sup>58</sup>    | 5                       | C <sub>4v</sub>     | 4            |
| OQODEE <sup>59</sup>    | 6                       | O <sub>h</sub>      | 6            |
| POGXEQ <sup>60</sup>    | 6                       | O <sub>h</sub>      | 6            |
| QO XVUW <sup>61</sup>   | 5                       | C <sub>4v</sub>     | 6            |
| SAVHIG <sup>62</sup>    | 5                       | C <sub>4v</sub>     | 6            |
| SELQIJ <sup>63</sup>    | 5                       | C <sub>4v</sub>     | 4            |
| SIDVIL <sup>64</sup>    | 6                       | O <sub>h</sub>      | 6            |
| TISDUU <sup>65</sup>    | 5                       | C <sub>4v</sub>     | 4            |
| TOQZEH <sup>66</sup>    | 6                       | O <sub>h</sub>      | 2            |
| UJAZOX <sup>67</sup>    | 6                       | O <sub>h</sub>      | 6            |
| UHEZOX <sup>68</sup>    | 6                       | O <sub>h</sub>      | 6            |
| UHIBAP <sup>68</sup>    | 6                       | O <sub>h</sub>      | 2            |
| UWIIQIB <sup>69</sup>   | 6                       | O <sub>h</sub>      | 6            |
| VEFGIW <sup>70</sup>    | 6                       | O <sub>h</sub>      | 6            |
| VOFZEV <sup>71</sup>    | 4                       | T <sub>d</sub>      | 6            |
| WUQBAN <sup>72</sup>    | 5                       | C <sub>4v</sub>     | 6            |

### 1.1.4 Fe(II) Complexes

Table S4: Geometries and experimental spin states Fe(II) crystal structures. <sup>a</sup>Structures used in the Fe(II) SCO benchmarking. <sup>b</sup>CCDC identifier for ferrocene.

| CCDC Identifier                   | Coordination Number | Closest Point Group | Multiplicity |
|-----------------------------------|---------------------|---------------------|--------------|
| <sup>a</sup> HPZBFE <sup>73</sup> | 6                   | $O_h$               | 1            |
| <sup>a</sup> KEKVIF <sup>74</sup> | 6                   | $O_h$               | 1            |
| <sup>a</sup> BAXFIS <sup>75</sup> | 6                   | $O_h$               | 1            |
| <sup>a</sup> NEFSUM <sup>76</sup> | 6                   | $O_h$               | 1            |
| <sup>a</sup> WAHKEX <sup>77</sup> | 6                   | $O_h$               | 1            |
| BOYDOI <sup>78</sup>              | 6                   | $O_h$               | 5            |
| CAGROU <sup>79</sup>              | 6                   | $O_h$               | 1            |
| DAGLUU <sup>80</sup>              | 4                   | $T_d$               | 5            |
| DEDWUE <sup>81</sup>              | 4                   | $D_{4h}$            | 3            |
| FEGVOE <sup>82</sup>              | 2                   | $D_{\infty h}$      | 5            |
| FEPHCY <sup>83,84</sup>           | 4                   | $D_{4h}$            | 5            |
| <sup>b</sup> FEROCE               | $2 \times \eta-5$   | $D_5$               | 1            |
| GORKIJ <sup>85</sup>              | 4                   | $T_d$               | 5            |
| HAZQAD <sup>86</sup>              | 6                   | $O_h$               | 1            |
| HMPBFE <sup>73</sup>              | 6                   | $O_h$               | 5            |
| IBUVUW <sup>87</sup>              | 6                   | $O_h$               | 1            |
| IKIJIX <sup>88</sup>              | 4                   | $T_d$               | 5            |
| JIRSUB <sup>89</sup>              | 4                   | $D_{4h}$            | 3            |
| OCAHAE <sup>80</sup>              | 6                   | $O_h$               | 5            |
| OCAHEI <sup>80</sup>              | 6                   | $O_h$               | 5            |
| POGXUG <sup>60</sup>              | 6                   | $O_h$               | 5            |
| QAHVIE <sup>90</sup>              | 6                   | $O_h$               | 1            |
| QOPBIH <sup>91</sup>              | 6                   | $O_h$               | 5            |
| RUWZUF <sup>92</sup>              | 4                   | $T_d$               | 5            |
| SAKWIM <sup>93</sup>              | 3                   | $D_{3h}$            | 5            |
| SUVROS <sup>94</sup>              | 4                   | $T_d$               | 5            |
| YIMHOT <sup>95</sup>              | 3                   | $D_{3h}$            | 5            |
| YUMVUX <sup>96</sup>              | 4                   | $T_d$               | 5            |

<sup>a</sup>Structures used in the Fe(II) SCO benchmarking. <sup>b</sup>CCDC identifier for ferrocene

### 1.1.5 Co(II) Complexes

Table S5: Geometries and experimental spin states Co(II) crystal structures. <sup>a</sup>Structures not deposited on the CSD.

| CCDC Identifier           | Coordination Number | Closest Point Group | Multiplicity |
|---------------------------|---------------------|---------------------|--------------|
| BIHGEE <sup>97</sup>      | 4                   | T <sub>d</sub>      | 4            |
| BIHGII <sup>98</sup>      | 4                   | T <sub>d</sub>      | 4            |
| BUQVOY <sup>99</sup>      | 4                   | T <sub>d</sub>      | 2            |
| CETBOV <sup>100</sup>     | 4                   | T <sub>d</sub>      | 4            |
| CETBUB <sup>100</sup>     | 4                   | T <sub>d</sub>      | 4            |
| CTPYCO <sup>101</sup>     | 5                   | C <sub>4v</sub>     | 4            |
| DAHROU <sup>102</sup>     | 6                   | O <sub>h</sub>      | 4            |
| FUFVUX <sup>103</sup>     | 4                   | T <sub>d</sub>      | 4            |
| JAWJAT <sup>104</sup>     | 6                   | O <sub>h</sub>      | 4            |
| JUWPIA <sup>105</sup>     | 4                   | D <sub>4h</sub>     | 2            |
| LEGWAW <sup>106,107</sup> | 4                   | T <sub>d</sub>      | 4            |
| KIQREL <sup>108</sup>     | 5                   | C <sub>4v</sub>     | 4            |
| KIQRIP <sup>108</sup>     | 6                   | O <sub>h</sub>      | 4            |
| KIQROV <sup>108</sup>     | 6                   | O <sub>h</sub>      | 4            |
| OZIMIV <sup>109</sup>     | 6                   | O <sub>h</sub>      | 4            |
| PEBSEW <sup>104</sup>     | 6                   | O <sub>h</sub>      | 4            |
| PEBSOG <sup>104</sup>     | 6                   | O <sub>h</sub>      | 4            |
| PEBSUM <sup>104</sup>     | 6                   | O <sub>h</sub>      | 4            |
| RIPSEO <sup>105</sup>     | 4                   | D <sub>4h</sub>     | 2            |
| RIP SIS <sup>105</sup>    | 4                   | D <sub>4h</sub>     | 2            |
| SAPBIV <sup>103</sup>     | 4                   | T <sub>d</sub>      | 4            |
| SEQFIE <sup>103</sup>     | 4                   | T <sub>d</sub>      | 4            |
| TPORCP <sup>110,111</sup> | 4                   | D <sub>4h</sub>     | 2            |
| TUBTIT <sup>112</sup>     | 2, $\eta$ -5        | C <sub>s</sub>      | 2            |
| UKUJUG <sup>113</sup>     | 4                   | T <sub>d</sub>      | 4            |
| VIYGIU <sup>114</sup>     | 6                   | O <sub>h</sub>      | 4            |
| XIZLUO <sup>115</sup>     | 6                   | O <sub>h</sub>      | 4            |
| YUDGUA <sup>100</sup>     | 4                   | T <sub>d</sub>      | 4            |

## 1.2 Spin-crossover dataset (*T\_SCO\_dataset*)

### 1.2.1 Fe(II) complexes with T<sub>SCO</sub>

Table S6: Fe(II) structures with their experimental  $T_{\text{SCO}}$  values<sup>116</sup>

| Identifier          | Complex Structure                                                                   | $T_{\text{SCO}}$ (K) |
|---------------------|-------------------------------------------------------------------------------------|----------------------|
| HALC-1              | 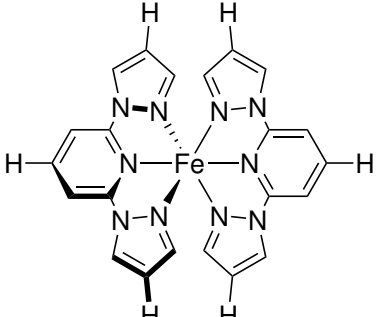   | 248                  |
| HALC-2              |    | 216                  |
| HALC-3              |  | 213                  |
| HALC-4              |  | 281                  |
| HALC-5 <sup>a</sup> |  |                      |

*Continued on next page...*

| Identifier          | Complex Structure | T <sub>sco</sub> (K) |
|---------------------|-------------------|----------------------|
| HALC-6 <sup>a</sup> |                   |                      |
| HALC-7              |                   | 309                  |
| HALC-8              |                   | 215                  |
| HALC-9              |                   | 164                  |
| HALC-10             |                   | 158                  |
| HALC-11             |                   | 215                  |

*Continued on next page...*

| Identifier | Complex Structure                                                                   | T <sub>SCO</sub> (K) |
|------------|-------------------------------------------------------------------------------------|----------------------|
| HALC-12    | 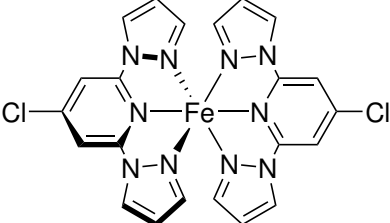   | 226                  |
| HALC-13    |    | 234                  |
| HALC-14    |    | 236                  |
| HALC-15    |   | 215                  |
| HALC-16    |  | 194                  |
| HALC-17    |  | 284                  |

*Continued on next page...*

| Identifier | Complex Structure                                                                   | T <sub>sco</sub> (K) |
|------------|-------------------------------------------------------------------------------------|----------------------|
| HALC-18    | 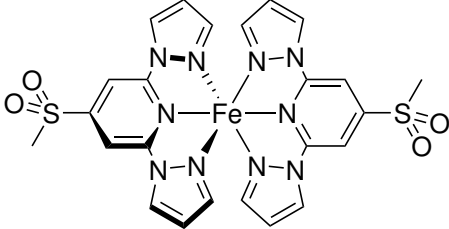   | 294                  |
| HALC-19    |    | 245                  |
| HALC-20    |   | 259                  |
| HALC-21    |  | 261                  |

*Continued on next page...*

| Identifier | Complex Structure                                                                   | T <sub>SCO</sub> (K) |
|------------|-------------------------------------------------------------------------------------|----------------------|
| HALC-22    | 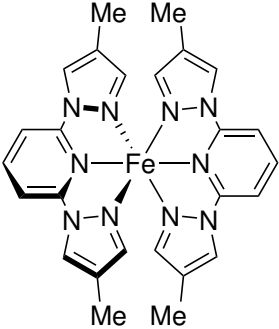   | 273                  |
| HALC-23    |    | 259                  |
| HALC-24    |   | 251                  |
| HALC-25    |  | 256                  |

*Continued on next page...*

| Identifier | Complex Structure | T <sub>sco</sub> (K) |
|------------|-------------------|----------------------|
| HALC-26    |                   | 231                  |
| HALC-27    |                   | 238                  |
| HALC-28    |                   | 237                  |
| ZUCROE     |                   | 280                  |

*Continued on next page...*

| Identifier | Complex Structure | T <sub>sco</sub> (K) |
|------------|-------------------|----------------------|
| WAHKEX     |                   | 184                  |
| KEKVIF03   |                   | 176                  |
| NEFSUM02   |                   | 160                  |
| HPZBFE     |                   | 393                  |
| BAXFIS02   |                   | 333                  |

<sup>a</sup>Structures were not included in analysis as they were high spin at all temperatures

## 2 Prediction of Spin States with DFT

### 2.1 General method

Cr(II) and Fe(II) complexes were optimised with their three different possible multiplicities ( $2S+1 = 1, 3, 5$ ). While low spin Cr(II) complexes are very rare, they are still possible, so their low spin structures was calculated.<sup>117</sup> Based on the known experimental values, Mn(II), Fe(III) complexes were optimised with their three different possible multiplicities ( $2S+1 = 2, 4, 6$ ) while cobalt(II) complexes were only optimised with two different multiplicities ( $2S+1 = 2, 4$ ). All jobs were initially allocated 16 CPU cores, 64 GB of RAM and 48 hours of time to optimise and calculate frequencies of all complexes. Jobs were considered successful when all frequencies of all multiplicities were not imaginary. Multiplicity was assigned to the complex when all separate calculations were successful. The success rate of optimisation for the four methods are 97%, 96%, 97% and 82% for B3LYP, PBE0, TPSSh and M06-L, respectively.

### 2.1.1 Energies of spin states

Table S7: PBE0/def2-TZVP electronic energy results for Cr(II) complexes.

| Identifier | Singlet energy (Hartrees) | Triplet energy (Hartrees) | Quintet energy (Hartrees) |
|------------|---------------------------|---------------------------|---------------------------|
| CAMVER     | -2965.092932              | -2965.140629              | -2965.126319              |
| CIDVOA     | -2221.698167              | -2221.766320              | -2221.817251              |
| DUYZII     | -3286.132177              | -3286.204451              | -3286.252610              |
| GENZII     | -3141.196005              | -3141.265337              | -3141.254985              |
| HIZNEJ     | -2138.006931              | -2138.048869              | -2138.047217              |
| HUYWOO     | -2544.174370              | -2544.237276              | -2544.275266              |
| KAPPEW     | -3122.017862              | -3122.065362              | -3122.113358              |
| LESMAX     | -1509.555159              | -1509.598970              | -1509.592819              |
| OKIJUQ     | -1892.726337              | -1892.787287              | -1892.834370              |
| OWUTIL     | -2769.186569              | -2769.273296              | -2769.272154              |
| PIXXEE     | -1755.270218              | -1755.292042              | -1755.296914              |
| SOFXAM     | -2711.399755              | -2711.460294              | -2711.507869              |
| SOFXIU     | -2414.591332              | -2414.646099              | -2414.683056              |
| UDURUJ     | -2676.964756              | -2677.023887              | -2677.071209              |
| VAZWAU     | -3795.168837              | -3795.218455              | -3795.227779              |
| YALPEG     | -2287.916178              | -2287.952998              | -2287.966292              |

Table S8: B3LYP/def2-TZVP electronic energy results for Cr(II) complexes

| Identifier | Singlet energy (Hartrees) | Triplet energy (Hartrees) | Quintet energy (Hartrees) |
|------------|---------------------------|---------------------------|---------------------------|
| CAMVER     | -2965.850956              | -2965.895588              | -2965.890569              |
| CIDVOA     | -2222.550111              | -2222.610120              | -2222.659546              |
| DUYZII     | -3287.223558              | -3287.285307              | -3287.329271              |
| GENZII     | -3142.217595              | -3142.277885              | -3142.267819              |
| HIZNEJ     | -2138.713336              | -2138.748455              | -2138.747049              |
| HUYWOO     | -2545.008954              | -2545.061365              | -2545.099364              |
| KAPPEW     | -3122.826954              | -3122.864440              | -3122.908072              |
| LESMAX     | -1509.940415              | -1509.976981              | -1509.971217              |
| OKIJUQ     | -1893.343841              | -1893.393863              | -1893.436394              |
| OWUTIL     | -2770.128157              | -2770.205962              | -2770.204359              |
| PIXXEE     | -1755.781921              | -1755.803217              | -1755.808444              |
| SOFXAM     | -2712.244234              | -2712.293758              | -2712.336746              |
| SOFXIU     | -2415.506516              | -2415.554729              | -2415.587350              |
| UDURUJ     | -2677.843303              | -2677.891602              | -2677.934686              |
| VAZWAU     | -3796.008592              | -3796.053486              | -3796.065537              |
| YALPEG     | -2288.704012              | -2288.734496              | -2288.747242              |

Table S9: TPSSh/def2-TZVP electronic energy results for Cr(II) complexes

| Identifier | Singlet energy (Hartrees) | Triplet energy (Hartrees) | Quintet energy (Hartrees) |
|------------|---------------------------|---------------------------|---------------------------|
| CAMVER     | -2966.689759              | -2966.728898              | -2966.704192              |
| CIDVOA     | -2223.281576              | -2223.339917              | -2223.371204              |
| DUYZII     | -3288.344569              | -3288.406051              | -3288.445049              |
| GENZII     | -3143.258472              | -3143.304562              | -3143.287898              |
| HIZNEJ     | -2139.692777              | -2139.730614              | -2139.714070              |
| HUYWOO     | -2545.880463              | -2545.921734              | -2545.956842              |
| KAPPEW     | -3123.461816              | -3123.496443              | -3123.534966              |
| LESMAX     | -1510.413407              | -1510.453244              | -1510.431722              |
| OKIJUQ     | -1894.064406              | -1894.116822              | -1894.155176              |
| OWUTIL     | -2771.172953              | -2771.238458              | -2771.236078              |
| PIXXEE     | -1756.431909              | -1756.440551              | -1756.428672              |
| SOFXAM     | -2713.026238              | -2713.074904              | -2713.113518              |
| SOFXIU     | -2416.519341              | -2416.567290              | -2416.591877              |
| UDURUJ     | -2678.830154              | -2678.878591              | -2678.917139              |
| VAZWAU     | -3796.851995              | -3796.894926              | -3796.889647              |
| YALPEG     | -2289.779735              | -2289.811440              | -2289.812760              |

Table S10: M06-L/def2-TZVP electronic energy results for Cr(II) complexes

| Identifier | Singlet energy (Hartrees) | Triplet energy (Hartrees) | Quintet energy (Hartrees) |
|------------|---------------------------|---------------------------|---------------------------|
| CAMVER     | -2966.424417              | -2966.464060              | -2966.446668              |
| CIDVOA     | -2223.038263              | -2223.103967              | -2223.129405              |
| DUYZII     | -3288.013007              | -3288.071759              | -3288.121688              |
| GENZII     | -3142.945357              | -3142.999176              | -3142.982334              |
| HIZNEJ     | -2139.408577              | -2139.458313              | -2139.442479              |
| HUYWOO     | -2545.602587              | -2545.650785              | -2545.687974              |
| KAPPEW     | -3123.235127              | -3123.275629              | -3123.326832              |
| LESMAX     | -1510.243840              | -1510.295625              | -1510.277461              |
| OKIJUQ     | -1893.832128              | -1893.825098              | -1893.931754              |
| OWUTIL     | -2770.862794              | -2770.935537              | -2770.934115              |
| PIXXEE     | -1756.230064              | -1756.235896              | -1756.227837              |
| SOFXAM     | -2712.742279              | -2712.818890              | -2712.868670              |
| UDURUJ     | -2678.505551              | -2678.577261              | -2678.628215              |
| VAZWAU     | -3797.060497              | -3797.108735              | -3797.109290              |
| YALPEG     | -2289.486743              | -2289.527214              | -2289.527805              |

Table S11: Spin state predictions for Cr(II). Green coloured boxes denote correctly predicted spin state, red coloured boxes denote incorrectly predicted spin state, white coloured box denote failed calculation.

| Identifier | Multiplicity | B3LYP | PBE0 | TPSSh | M06-L |
|------------|--------------|-------|------|-------|-------|
| CAMVER     | 3            | 3     | 3    | 3     | 3     |
| CIDVOA     | 5            | 5     | 5    | 5     | 5     |
| DUYZII     | 5            | 5     | 5    | 5     | 5     |
| GENZII     | 3            | 3     | 3    | 3     | 3     |
| HIZNEJ     | 3            | 3     | 3    | 3     | 3     |
| HUYWOO     | 5            | 5     | 5    | 5     | 5     |
| KAPPEW     | 5            | 5     | 5    | 5     | 5     |
| LESMAX     | 3            | 3     | 3    | 3     | 3     |
| OKIJUQ     | 5            | 5     | 5    | 5     | 5     |
| OWUTIL     | 3            | 3     | 3    | 3     | 3     |
| PIXXEE     | 3            | 5     | 5    | 3     | 3     |
| SOFXAM     | 5            | 5     | 5    | 5     | 5     |
| SOFXIU     | 5            | 5     | 5    | 5     |       |
| UDURUJ     | 5            | 5     | 5    | 5     | 5     |
| VAZWAU     | 5            | 5     | 5    | 3     | 5     |
| YALPEG     | 3            | 5     | 5    | 5     | 5     |

Table S12: PBE0/def2-TZVP electronic energy results for Mn(II) complexes

| Identifier | Doublet energy (Hartrees) | Quartet energy (Hartrees) | Sextet energy (Hartrees) |
|------------|---------------------------|---------------------------|--------------------------|
| AXUMEL     | -5689.827701              | -5689.827407              | -5689.798238             |
| AZULIQ     | -3142.375404              | -3142.394715              | -3142.454367             |
| BIKZUQ     | -3036.773722              | -3036.780734              | -3036.832685             |
| BUBGEL     | -3988.293672              | -3988.286892              | -3988.323546             |
| BUBGUB     | -2480.175131              | -2480.164115              | -2480.200363             |
| BUSMOR     | -3043.948272              | -3043.990661              | -3044.034276             |
| CAZZUY     | -2849.592096              | -2849.624671              | -2849.667822             |
| CEBBAM     | -3301.316589              | -3301.296535              | -3301.309972             |
| EQEGEN     | -3282.087405              | -3282.095149              | -3282.146144             |
| GIQMUO     | -3371.637413              | -3371.660175              | -3371.696749             |
| HEVCEQ     | -2840.912344              | -2840.930373              | -2840.995535             |
| IKEQUK     | -3727.283639              | -3727.308770              | -3727.354370             |
| IMAFEH     | -3312.893977              | -3312.908420              | -3312.832174             |
| KASNUQ     | -7902.326978              | -7902.345564              | -7902.405283             |
| KEYPIT     | -2321.993623              | -2322.019297              | -2322.064903             |
| MNPHCY     | -2816.683511              | -2816.720057              | -2816.701836             |
| NUYZIS     | -2967.956027              | -2967.982660              | -2968.033581             |
| ODIZEG     | -2771.158887              | -2771.137623              | -2771.159830             |
| OKUXUO     | -3007.140965              | -3007.171396              | -3007.216753             |
| QABBAA     | -3654.031158              | -3654.060789              | -3654.126767             |
| TAWFUT     | -4531.704351              | -4531.719415              | -4531.776204             |
| TOGPEK     | -6015.594281              | -6015.629354              | -6015.620619             |
| TUSBIT     | -2437.264948              | -2437.287263              | -2437.346614             |
| VAQDUM     | -4021.100406              | -4021.111760              | -4021.155296             |
| VEBJOB     | -2480.199408              | -2480.189597              | -2480.222637             |
| XAKDOE     | -2857.660016              | -2857.684963              | -2857.738385             |
| XAMWEP     | -2879.815971              | -2879.849287              | -2879.906217             |
| ZIMGIL     | -2966.538775              | -2966.536346              | -2966.589897             |

Table S13: B3LYP/def2-TZVP electronic energy results for Mn(II) complexes

| Identifier | Doublet energy (Hartrees) | Quartet energy (Hartrees) | Sextet energy (Hartrees) |
|------------|---------------------------|---------------------------|--------------------------|
| AXUMEL     | -5690.916321              | -5690.913110              | -5690.881994             |
| AZULIQ     | -3143.328967              | -3143.347574              | -3143.398637             |
| BIKZUQ     | -3037.738839              | -3037.742654              | -3037.788385             |
| BUBGEL     | -3989.515314              | -3989.507080              | -3989.537506             |
| BUBGUB     | -2481.000042              | -2480.987904              | -2481.017679             |
| BUSMOR     | -3044.707661              | -3044.747032              | -3044.784221             |
| CAZZUY     | -2850.463970              | -2850.490918              | -2850.530520             |
| CEBBAM     | -3302.200252              | -3302.198372              | -3302.208924             |
| EQEGEN     | -3283.203102              | -3283.203721              | -3283.254283             |
| GIQMUO     | -3373.090899              | -3373.108481              | -3373.138211             |
| HEVCEQ     | -2841.652998              | -2841.668454              | -2841.727574             |
| IKEQUK     | -3728.679326              | -3728.691948              | -3728.741240             |
| IMAFEH     | -3314.258748              | -3314.269493              | -3314.256440             |
| KASNUQ     | -7903.736658              | -7903.753491              | -7903.806337             |
| KEYPIT     | -2322.835236              | -2322.865659              | -2322.895527             |
| MNPHCY     | -2817.769209              | -2817.796786              | -2817.774087             |
| NUYZIS     | -2968.732875              | -2968.756680              | -2968.803478             |
| OKUXUO     | -3008.086051              | -3008.109934              | -3008.152055             |
| QABBAA     | -3655.263321              | -3655.286914              | -3655.348669             |
| SUTWOT     | -4317.995075              | -4317.998415              | -4318.034634             |
| TAWFUT     | -4533.236389              | -4533.248455              | -4533.296690             |
| TOGPEK     | -6017.365109              | -6017.401100              | -6017.389514             |
| TUSBIT     | -2438.161703              | -2438.181146              | -2438.232575             |
| VAQDUM     | -4022.922429              | -4022.927307              | -4022.966341             |
| VEBJOB     | -2481.027103              | -2481.016515              | -2481.043941             |
| XAKDOE     | -2858.535062              | -2858.542975              | -2858.603455             |
| XAMWEP     | -2880.919105              | -2880.949331              | -2880.999015             |
| ZIMGIL     | -2967.724919              | -2967.720354              | -2967.766065             |

Table S14: TPSSh/def2-TZVP electronic energy results for Mn(II) complexes

| Identifier | Doublet energy (Hartrees) | Quartet energy (Hartrees) | Sextet energy (Hartrees) |
|------------|---------------------------|---------------------------|--------------------------|
| AXUMEL     | -5691.851890              | -5691.839414              | -5691.796412             |
| AZULIQ     | -3144.287023              | -3144.291517              | -3144.331646             |
| BIKZUQ     | -3038.662031              | -3038.653100              | -3038.688900             |
| BUBGEL     | -3990.848169              | -3990.827947              | -3990.845048             |
| BUBGUB     | -2482.179777              | -2482.154353              | -2482.171783             |
| BUSMOR     | -3045.520537              | -3045.554397              | -3045.579422             |
| CAZZUY     | -2851.484889              | -2851.507938              | -2851.534931             |
| CEBBAM     | -3303.203506              | -3303.169674              | -3303.168008             |
| EQEGEN     | -3284.345425              | -3284.335546              | -3284.368028             |
| GIQMUO     | -3374.137952              | -3374.147473              | -3374.159832             |
| HEVCEQ     | -2842.471280              | -2842.474339              | -2842.524753             |
| IKEQUK     | -3730.032141              | -3730.047665              | -3730.069944             |
| IMAFEH     | -3315.815926              | -3315.789670              | -3315.794362             |
| KASNUQ     | -7904.935276              | -7904.939264              | -7904.979340             |
| KEYPIT     | -2323.566508              | -2323.578357              | -2323.608155             |
| MNPHCY     | -2818.968685              | -2818.998813              | -2818.974757             |
| NUYZIS     | -2969.542038              | -2969.559045              | -2969.590225             |
| ODIZEG     | -2772.940014              | -2772.904879              | -2772.909208             |
| OKUXUO     | -3009.018865              | -3009.035104              | -3009.060803             |
| QABBAA     | -3656.645526              | -3656.663221              | -3656.718800             |
| SUTWOT     | -4319.676873              | -4319.673970              | -4319.688404             |
| TAWFUT     | -4534.705980              | -4534.704804              | -4534.744039             |
| TOGPEK     | -6019.162275              | -6019.197917              | -6019.185493             |
| TUSBIT     | -2438.994803              | -2439.001277              | -2439.041944             |
| VAQDUM     | -4024.436369              | -4024.429724              | -4024.451690             |
| VEBJOB     | -2482.204285              | -2482.180070              | -2482.195112             |
| XAKDOE     | -2859.331324              | -2859.322328              | -2859.377369             |
| XAMWEP     | -2882.258783              | -2882.285165              | -2882.324819             |
| ZIMGIL     | -2968.927499              | -2968.908886              | -2968.942942             |

Table S15: M06-L/def2-TZVP electronic energy results for Mn(II) complexes

| Identifier | Doublet energy (Hartrees) | Quartet energy (Hartrees) | Sextet energy (Hartrees) |
|------------|---------------------------|---------------------------|--------------------------|
| AXUMEL     | -5691.507722              | -5691.494000              | -5691.453317             |
| AZULIQ     | -3143.972183              | -3143.990239              | -3144.041582             |
| BIKZUQ     | -3038.360100              | -3038.363754              | -3038.414392             |
| BUBGEL     | -3990.438758              | -3990.426943              | -3990.449138             |
| BUBGUB     | -2481.862834              | -2481.846192              | -2481.870197             |
| BUSMOR     | -3045.251203              | -3045.294322              | -3045.332317             |
| CAZZUY     | -2851.163869              | -2851.190078              | -2851.227474             |
| CEBBAM     | -3302.887492              | -3302.861109              | -3302.869434             |
| EQEGEN     | -3283.987664              | -3283.994573              | -3284.036106             |
| GIQMUO     | -3373.775833              | -3373.794640              | -3373.817830             |
| HEVCEQ     | -2842.209565              | -2842.223575              | -2842.295373             |
| IMAFEH     | -3315.353475              | -3315.354709              | -3315.342704             |
| KASNUQ     | -7904.559297              | -7904.578096              | -7904.628630             |
| MNPHCY     | -2818.604515              | -2818.632057              | -2818.614206             |
| NUYZIS     | -2969.271830              | -2969.293800              | -2969.332076             |
| OKUXUO     | -3008.723987              | -3008.758568              | -3008.789325             |
| QABBAA     | -3656.246044              | -3656.279700              | -3656.342074             |
| SUTWOT     | -4319.149281              | -4319.155354              | -4319.179957             |
| TAWFUT     | -4534.235379              | -4534.248297              | -4534.302656             |
| TOGPEK     | -6018.602080              | -6018.649331              | -6018.640411             |
| TUSBIT     | -2438.726083              | -2438.752703              | -2438.795279             |
| VEBJOB     | -2481.892736              | -2481.875557              | -2481.894576             |
| XAKDOE     | -2859.069895              | -2859.085476              | -2859.143242             |
| XAMWEP     | -2881.860062              | -2881.896680              | -2881.949440             |
| ZIMGIL     | -2968.554775              | -2968.561517              | -2968.595151             |

Table S16: Spin state predictions for Mn(II). Green coloured boxes denote correctly predicted spin state, red coloured boxes denote incorrectly predicted spin state, white coloured box denote failed calculation. The experimental ground spin states are shown in Tabel S2.

| Identifier | Multiplicity | B3LYP | PBE0 | TPSSh | M06-L |
|------------|--------------|-------|------|-------|-------|
| AXUMEL     | 2            | 2     | 2    | 2     | 2     |
| AZULIQ     | 6            | 6     | 6    | 6     | 6     |
| BIKZUQ     | 6            | 6     | 6    | 6     | 6     |
| BUBGEL     | 6            | 6     | 6    | 2     | 6     |
| BUBGUB     | 6            | 6     | 6    | 2     | 6     |
| BUSMOR     | 6            | 6     | 6    | 6     | 6     |
| CAZZUY     | 6            | 6     | 6    | 6     | 6     |
| CEBBAM     | 2            | 6     | 2    | 2     | 2     |
| EQEGEN     | 6            | 6     | 6    | 6     | 6     |
| GIQMUO     | 6            | 6     | 6    | 6     | 6     |
| HEVCEQ     | 6            | 6     | 6    | 6     | 6     |
| IKEQUK     | 6            | 6     | 6    | 6     |       |
| IMAFEH     | 4            | 4     | 4    | 2     | 4     |
| KASNUQ     | 6            | 6     | 6    | 6     | 6     |
| KEYPIT     | 6            | 6     | 6    | 6     |       |
| MNPHCY     | 4            | 4     | 4    | 4     | 4     |
| NUYZIS     | 6            | 6     | 6    | 6     | 6     |
| OKUXUO     | 6            | 6     | 6    | 6     | 6     |
| QABBAA     | 6            | 6     | 6    | 6     | 6     |
| SUTWOT     | 6            | 6     |      | 6     | 6     |
| TAWFUT     | 6            | 6     | 6    | 6     | 6     |
| TOGPEK     | 6            | 4     | 4    | 4     | 4     |
| TUSBIT     | 6            | 6     | 6    | 6     | 6     |
| VAQDUM     | 6            | 6     | 6    | 6     |       |
| VEBJOB     | 6            | 6     | 6    | 2     | 6     |
| XAKDOE     | 6            | 6     | 6    | 6     | 6     |
| XAMWEP     | 6            | 6     | 6    | 6     | 6     |
| ZIMGIL     | 6            | 6     | 6    | 6     | 6     |
| ODIZEG     | 2            |       | 6    | 2     |       |

Table S17: PBE0/def2-TZVP electronic energy results for Fe(III) complexes.

| Identifier | Doublet energy (Hartrees) | Quartet energy (Hartrees) | Sextet energy (Hartrees) |
|------------|---------------------------|---------------------------|--------------------------|
| CALGAX     | -3454.701242              | -3454.721395              | -3454.728100             |
| CELVEU     | -3398.310726              | -3398.332964              | -3398.345798             |
| CEQPOF     | -2338.394240              | -2338.390600              | -2338.380045             |
| ELIRUN     | -3598.547838              | -3598.566883              | -3598.586441             |
| EXUBIK     | -2928.542788              | -2928.501825              | -2928.459310             |
| FEACAC     | -2298.434320              | -2298.430609              | -2298.460360             |
| FONNAZ     | -3112.438508              | -3112.427864              | -3112.448885             |
| GEDTUE     | -3812.930927              | -3812.959693              | -3812.958029             |
| KANYUT     | -3634.651886              | -3634.672979              | -3634.681740             |
| KIKBOV     | -4784.606395              | -4784.633550              | -4784.689208             |
| LUJNOV     | -3317.081340              | -3317.098518              | -3317.122075             |
| MOPDUQ     | -2921.268658              | -2921.265283              | -2921.293750             |
| OETPFE     | -3638.829696              | -3638.855869              | -3638.860140             |
| OQODEE     | -3366.234706              | -3366.248325              | -3366.273300             |
| POGXEQ     | -3205.094958              | -3205.089939              | -3205.121407             |
| QOXVUW     | -5299.438683              | -5299.465129              | -5299.483357             |
| SAVHIG     | -4715.030285              | -4715.062844              | -4715.073348             |
| SELQIJ     | -4094.112998              | -4094.136719              | -4094.137715             |
| SIDVIL     | -2227.089750              | -2227.099435              | -2227.128990             |
| TISDUU     | -6549.112546              | -6549.134943              | -6549.095078             |
| TOQZEH     | -3212.329715              | -3212.326484              | -3212.358244             |
| UHEZOX     | -2774.226066              | -2774.216403              | -2774.239405             |
| UHIBAP     | -2406.893633              | -2406.881869              | -2406.890233             |
| UJAZOX     | -4612.091274              | -4612.080946              | -4612.103768             |
| UWIQIB     | -2945.603283              | -2945.613848              | -2945.635810             |
| VEFGIW     | -3827.481806              | -3827.491676              | -3827.521959             |
| VOFZEV     | -3255.731874              | -3255.763698              | -3255.813000             |
| WUQBAN     | -3116.797654              | -3116.816612              | -3116.844414             |

Table S18: B3LYP/def2-TZVP electronic energy results for Fe(III) complexes

| Identifier | Doublet energy (Hartrees) | Quartet energy (Hartrees) | Sextet energy (Hartrees) |
|------------|---------------------------|---------------------------|--------------------------|
| CALGAX     | -3456.095089              | -3456.111631              | -3456.110799             |
| CELVEU     | -3399.255246              | -3399.275050              | -3399.282344             |
| CEQPOF     | -2338.948194              | -2338.954598              | -2338.935909             |
| ELIRUN     | -3599.543878              | -3599.559879              | -3599.574095             |
| EXUBIK     | -2929.662133              | -2929.621073              | -2929.578261             |
| FEACAC     | -2299.209721              | -2299.202383              | -2299.225670             |
| FONNAZ     | -3113.517751              | -3113.503563              | -3113.521010             |
| GEDTUE     | -3813.786988              | -3813.812959              | -3813.808651             |
| KANYUT     | -3635.977133              | -3635.995310              | -3635.997457             |
| KIKBOV     | -4786.181901              | -4786.205765              | -4786.256624             |
| LUJNOV     | -3317.951608              | -3317.965384              | -3317.984012             |
| MOPDUQ     | -2922.370835              | -2922.365219              | -2922.388113             |
| OETPFE     | -3640.143095              | -3640.158915              | -3640.159974             |
| OQODEE     | -3367.102555              | -3367.113128              | -3367.132693             |
| POGXEQ     | -3206.089646              | -3206.081587              | -3206.106558             |
| QOXVUW     | -5301.577527              | -5301.600893              | -5301.614689             |
| SAVHIG     | -4716.434873              | -4716.464177              | -4716.474712             |
| SELQIJ     | -4095.420788              | -4095.440600              | -4095.439177             |
| SIDVIL     | -2227.827418              | -2227.833938              | -2227.857073             |
| TISDUU     | -6550.978386              | -6550.998140              | -6550.956714             |
| TOQZEH     | -3213.608430              | -3213.601574              | -3213.626935             |
| UHEZOX     | -2775.077887              | -2775.065819              | -2775.083288             |
| UHIBAP     | -2407.709384              | -2407.695631              | -2407.698873             |
| UJAZOX     | -4613.325008              | -4613.312328              | -4613.329771             |
| UWIQIB     | -2946.565284              | -2946.573912              | -2946.589752             |
| VEFGIW     | -3828.610568              | -3828.617586              | -3828.642367             |
| VOFZEV     | -3256.484540              | -3256.510841              | -3256.557490             |
| WUQBAN     | -3117.690502              | -3117.706579              | -3117.729266             |

Table S19: TPSSh/def2-TZVP electronic energy results for Fe(III) complexes

| Identifier | Doublet energy (Hartrees) | Quartet energy (Hartrees) | Sextet energy (Hartrees) |
|------------|---------------------------|---------------------------|--------------------------|
| CALGAX     | -3457.651182              | -3457.653784              | -3457.653112             |
| CELVEU     | -3400.132887              | -3400.144764              | -3400.143402             |
| CEQPOF     | -2339.577339              | -2339.555893              | -2339.538454             |
| ELIRUN     | -3600.478419              | -3600.484946              | -3600.490473             |
| EXUBIK     | -2930.749188              | -2930.707200              | -2930.711071             |
| FEACAC     | -2299.932707              | -2299.914898              | -2299.929220             |
| FONNAZ     | -3114.624733              | -3114.600116              | -3114.608141             |
| GEDTUE     | -3814.570168              | -3814.587326              | -3814.575813             |
| KANYUT     | -3637.477154              | -3637.486920              | -3637.481996             |
| KIKBOV     | -4787.637450              | -4787.653177              | -4787.696437             |
| LUJNOV     | -3318.731730              | -3318.737854              | -3318.747967             |
| MOPDUQ     | -2923.513402              | -2923.497001              | -2923.512007             |
| OETPFE     | -3641.622691              | -3641.628126              | -3641.620088             |
| OQODEE     | -3367.889693              | -3367.888067              | -3367.901876             |
| POGXEQ     | -3207.001596              | -3206.983005              | -3207.000394             |
| QOXVUW     | -5303.456830              | -5303.471959              | -5303.479169             |
| SAVHIG     | -4717.864492              | -4717.884741              | -4717.887152             |
| SELQIJ     | -4096.847256              | -4096.856019              | -4096.847032             |
| SIDVIL     | -2228.383316              | -2228.380476              | -2228.396939             |
| TISDUU     | -6552.818155              | -6552.829753              | -6552.787489             |
| TOQZEH     | -3214.948250              | -3214.930727              | -3214.946727             |
| UHEZOX     | -2775.949728              | -2775.925956              | -2775.935450             |
| UHIBAP     | -2408.565735              | -2408.540023              | -2408.534307             |
| UJAZOX     | -4614.456177              | -4614.431796              | -4614.441197             |
| UWIQIB     | -2947.495668              | -2947.492782              | -2947.501366             |
| VEFGIW     | -3829.715473              | -3829.709905              | -3829.728753             |
| VOFZEV     | -3257.105083              | -3257.123797              | -3257.159692             |
| WUQBAN     | -3118.547334              | -3118.554239              | -3118.568705             |

Table S20: M06-L/def2-TZVP electronic energy results for Fe(III) complexes

| Identifier | Doublet energy (Hartrees) | Quartet energy (Hartrees) | Sextet energy (Hartrees) |
|------------|---------------------------|---------------------------|--------------------------|
| CALGAX     | -3457.166907              | -3457.182256              | -3457.201483             |
| CELVEU     | -3399.825329              | -3399.845862              | -3399.863691             |
| CEQPOF     | -2339.617019              | -2339.603408              | -2339.591626             |
| EXUBIK     | -2930.425897              | -2930.381441              | -2930.412307             |
| FEACAC     | -2299.698414              | -2299.691462              | -2299.724374             |
| KANYUT     | -3637.005417              | -3637.024628              | -3637.040641             |
| LUJNOV     | -3318.468922              | -3318.491120              | -3318.510193             |
| MOPDUQ     | -2923.148052              | -2923.144658              | -2923.178035             |
| OQODEE     | -3367.628191              | -3367.637411              | -3367.670132             |
| POGXEQ     | -3206.693616              | -3206.684086              | -3206.723749             |
| SAVHIG     | -4717.399709              | -4717.435471              | -4717.449976             |
| TISDUU     | -6552.243728              | -6552.263786              | -6552.270730             |
| TOQZEH     | -3214.530563              | -3214.525676              | -3214.558649             |
| UHEZOX     | -2775.661800              | -2775.649612              | -2775.678350             |
| UHIBAP     | -2408.281638              | -2408.268226              | -2408.279777             |
| UJAZOX     | -4614.091518              | -4614.081678              | -4614.106695             |
| UWIQIB     | -2947.189681              | -2947.196647              | -2947.226336             |
| VEFGIW     | -3829.369214              | -3829.374163              | -3829.413339             |
| WUQBAN     | -3118.253379              | -3118.271583              | -3118.308039             |

Table S21: Spin state predictions for Fe(III). Green coloured boxes denote correctly predicted spin state, red coloured boxes denote incorrectly predicted spin state, white coloured box denote failed calculation. The experimental ground spin states are shown in Tabel S3.

| Identifier | Multiplicity | B3LYP | PBE0 | TPSSh | M06-L |
|------------|--------------|-------|------|-------|-------|
| CALGAX     | 6            | 4     | 6    | 4     | 6     |
| CELVEU     | 6            | 6     | 6    | 4     | 6     |
| CEQPOF     | 2            | 4     | 2    | 2     | 2     |
| ELIRUN     | 6            | 6     | 6    | 6     |       |
| EXUBIK     | 6            | 2     | 2    | 2     | 2     |
| FEACAC     | 6            | 6     | 6    | 2     | 6     |
| FONNAZ     | 6            | 6     | 6    | 2     |       |
| GEDTUE     | 4            | 4     | 4    | 4     |       |
| KANYUT     | 6            | 6     | 6    | 4     | 6     |
| KIKBOV     | 6            | 6     | 6    | 6     |       |
| LUJNOV     | 6            | 6     | 6    | 6     | 6     |
| MOPDUQ     | 6            | 6     | 6    | 2     | 6     |
| OETPFE     | 4            | 6     | 6    | 4     |       |
| OQODEE     | 6            | 6     | 6    | 6     | 6     |
| POGXEQ     | 6            | 6     | 6    | 2     | 6     |
| QOXVUW     | 6            | 6     | 6    | 6     |       |
| SAVHIG     | 6            | 6     | 6    | 6     | 6     |
| SELQIJ     | 4            | 4     | 6    | 4     |       |
| SIDVIL     | 6            | 6     | 6    | 6     |       |
| TISDUU     | 4            | 4     | 4    | 4     | 6     |
| TOQZEH     | 2            | 6     | 6    | 2     | 6     |
| UHEZOX     | 6            | 6     | 6    | 2     | 6     |
| UHIBAP     | 2            | 2     | 2    | 2     | 2     |
| UJAZOX     | 6            | 6     | 6    | 2     | 6     |
| UWIQIB     | 6            | 6     | 6    | 6     | 6     |
| VEFGIW     | 6            | 6     | 6    | 6     | 6     |
| VOFZEV     | 6            | 6     | 6    | 6     |       |
| WUQBAN     | 6            | 6     | 6    | 6     | 6     |

Table S22: PBE0/def2-TZVP electronic energy results for Fe(II) complexes

| Identifier | Singlet energy (Hartrees) | Triplet energy (Hartrees) | Quintet energy (Hartrees) |
|------------|---------------------------|---------------------------|---------------------------|
| BOYDOI     | -3199.306998              | -3199.317488              | -3199.344528              |
| CAGROU     | -3203.535637              | -3203.508592              | -3203.538500              |
| DAGLUU     | -2833.451712              | -2833.477196              | -2833.529109              |
| DEDWUE     | -2879.593694              | -2879.652354              | -2879.650839              |
| FEGVOE     | -3125.257485              | -3125.302078              | -3125.346789              |
| FEROCE     | -1650.275667              | -1650.245908              | -1650.254782              |
| GORKIJ     | -2845.837721              | -2845.866317              | -2845.902655              |
| HAZQAD     | -3025.816502              | -3025.777578              | -3025.780959              |
| HMPBFE     | -3138.697198              | -3138.683995              | -3138.715576              |
| IBUVUW     | -3326.410073              | -3326.403371              | -3326.427241              |
| IKIJIX     | -7915.483515              | -7915.512074              | -7915.563288              |
| JIRSUB     | -3485.419602              | -3485.474339              | -3485.457717              |
| OCAHAE     | -2726.611143              | -2726.616578              | -2726.652468              |
| OCAHEI     | -2979.617881              | -2979.628995              | -2979.663994              |
| POGXUG     | -7993.790139              | -7993.778728              | -7993.810008              |
| QAHVIE     | -3827.623474              | -3827.582059              | -3827.652775              |
| QOPBIH     | -2601.188807              | -2601.204845              | -2601.219580              |
| RUWZUF     | -2457.009222              | -2457.054128              | -2457.059356              |
| SAKWIM     | -4055.636935              | -4055.699825              | -4055.743653              |
| SUVROS     | -3312.630312              | -3312.664142              | -3312.714342              |
| YIMHOT     | -3121.043090              | -3121.096462              | -3121.129878              |
| YUMVUX     | -3470.825127              | -3470.865999              | -3470.880764              |

Table S23: B3LYP/def2-TZVP electronic energy results for Fe(II) complexes

| Identifier | Singlet energy (Hartrees) | Triplet energy (Hartrees) | Quintet energy (Hartrees) |
|------------|---------------------------|---------------------------|---------------------------|
| BOYDOI     | -3200.334791              | -3200.343280              | -3200.365222              |
| CAGROU     | -3204.797991              | -3204.766785              | -3204.792703              |
| DAGLUU     | -2834.177639              | -2834.196408              | -2834.243771              |
| DEDWUE     | -2880.630672              | -2880.686333              | -2880.618672              |
| FEGVOE     | -3126.279644              | -3126.324524              | -3126.361248              |
| FEPHCY     | -2930.461909              | -2930.515131              | -2930.473686              |
| FEROCE     | -1650.629276              | -1650.602463              | -1650.607502              |
| GORKIJ     | -2846.857013              | -2846.883073              | -2846.914155              |
| HAZQAD     | -3026.960660              | -3026.923479              | -3026.922442              |
| HMPBFE     | -3139.881342              | -3139.867648              | -3139.893741              |
| IBUVUW     | -3327.775246              | -3327.766876              | -3327.784938              |
| IKIJIX     | -7916.837121              | -7916.858798              | -7916.905117              |
| JIRSUB     | -3486.548080              | -3486.594355              | -3486.580394              |
| OCAHAE     | -2727.620256              | -2727.622555              | -2727.651152              |
| OCAHEI     | -2980.776815              | -2980.785660              | -2980.812498              |
| POGXUG     | -7995.143837              | -7995.129425              | -7995.156508              |
| QAHVIE     | -3828.985655              | -3828.943960              | -3828.997182              |
| QOPBIH     | -2602.129196              | -2602.142798              | -2602.150851              |
| RUWZUF     | -2457.839132              | -2457.878475              | -2457.882145              |
| SAKWIM     | -4056.887313              | -4056.942223              | -4056.981598              |
| SUVROS     | -3313.478973              | -3313.506695              | -3313.552827              |
| YIMHOT     | -3122.218572              | -3122.265594              | -3122.292798              |
| YUMVUX     | -3471.880537              | -3471.924140              | -3471.931527              |

Table S24: TPSSh/def2-TZVP electronic energy results for Fe(II) complexes

| Identifier | Singlet energy (Hartrees) | Triplet energy (Hartrees) | Quintet energy (Hartrees) |
|------------|---------------------------|---------------------------|---------------------------|
| BOYDOI     | -3201.238199              | -3201.240284              | -3201.250054              |
| CAGROU     | -3206.187711              | -3206.157902              | -3206.157853              |
| DAGLUU     | -2834.862888              | -2834.873419              | -2834.913272              |
| FEGVOE     | -3127.473355              | -3127.503911              | -3127.534932              |
| FEPHCY     | -2931.662247              | -2931.716234              | -2931.672698              |
| FEROCE     | -1651.054682              | -1651.009928              | -1651.000501              |
| GORKIJ     | -2848.120078              | -2848.137621              | -2848.158781              |
| HAZQAD     | -3028.326042              | -3028.273217              | -3028.259364              |
| HMPBFE     | -3141.295362              | -3141.270864              | -3141.286390              |
| IBUVUW     | -3329.174447              | -3329.136136              | -3329.167633              |
| IKIJIX     | -7918.095234              | -7918.120331              | -7918.144218              |
| JIRSUB     | -3487.975237              | -3488.019461              | -3487.990412              |
| OCAHAE     | -2728.603671              | -2728.597227              | -2728.613245              |
| OCAHEI     | -2981.939506              | -2981.939410              | -2981.954202              |
| POGXUG     | -7996.172046              | -7996.148384              | -7996.163603              |
| QAHVIE     | -3830.335654              | -3830.302912              | -3830.333854              |
| QOPBIH     | -2603.048322              | -2603.056988              | -2603.054056              |
| RUWZUF     | -2458.812254              | -2458.843580              | -2458.834284              |
| SAKWIM     | -4058.295595              | -4058.348058              | -4058.378655              |
| SUVROS     | -3314.287078              | -3314.312248              | -3314.350369              |
| YIMHOT     | -3123.702764              | -3123.746311              | -3123.763570              |
| YUMVUX     | -3473.011405              | -3473.041367              | -3473.038683              |

Table S25: M06-L/def2-TZVP electronic energy results for Fe(II) complexes

| Identifier | Singlet energy (Hartrees) | Triplet energy (Hartrees) | Quintet energy (Hartrees) |
|------------|---------------------------|---------------------------|---------------------------|
| CAGROU     | -3205.758264              | -3205.725740              | -3205.744264              |
| DAGLUU     | -2834.633301              | -2834.641774              | -2834.690720              |
| DEDWUE     | -2881.520616              | -2881.568016              | -2881.564568              |
| FEGVOE     | -3127.114955              | -3127.149556              | -3127.193057              |
| FEPHCY     | -2931.283377              | -2931.330274              | -2931.311231              |
| FEROCE     | -1650.903525              | -1650.853661              | -1650.854632              |
| GORKIJ     | -2847.754079              | -2847.764398              | -2847.798429              |
| HAZQAD     | -3027.912122              | -3027.870053              | -3027.868824              |
| HMPBFE     | -3140.901632              | -3140.872755              | -3140.893980              |
| IBUVUW     | -3328.775462              | -3328.724211              | -3328.779670              |
| IKIJIX     | -7917.724773              | -7917.749425              | -7917.787497              |
| OCAHAE     | -2728.300332              | -2728.292646              | -2728.318056              |
| OCAHEI     | -2981.586631              | -2981.570767              | -2981.609173              |
| POGXUG     | -7995.851698              | -7995.828534              | -7995.855514              |
| QAHVIE     | -3829.929613              | -3829.916832              | -3829.921834              |
| QOPBIH     | -2602.760009              | -2602.762746              | -2602.777875              |
| RUWZUF     | -2458.506357              | -2458.543688              | -2458.538229              |
| SAKWIM     | -4057.892553              | -4057.937529              | -4057.978570              |
| SUVROS     | -3314.007171              | -3314.026275              | -3314.077196              |

Table S26: Spin state predictions for Fe(II). Green coloured boxes denote correctly predicted spin state, red coloured boxes denote incorrectly predicted spin state, white coloured box denote failed calculation. The experimental ground spin states are shown in Tabel S4.

| Identifier | Multiplicity | B3LYP | PBE0 | TPSSh | M06-L |
|------------|--------------|-------|------|-------|-------|
| BOYDOI     | 5            | 5     | 5    | 5     |       |
| CAGROU     | 1            | 1     | 5    | 1     | 1     |
| DAGLUU     | 5            | 5     | 5    | 5     | 5     |
| DEDWUE     | 3            | 3     | 3    |       | 3     |
| FEGVOE     | 5            | 5     | 5    | 5     | 5     |
| FEPHCY     | 3            | 3     |      | 3     | 3     |
| FEROCE     | 1            | 1     | 1    | 1     | 1     |
| GORKIJ     | 5            | 5     | 5    | 5     | 5     |
| HAZQAD     | 1            | 1     | 1    | 1     | 1     |
| HMPBFE     | 5            | 5     | 5    | 1     | 1     |
| IBUVUW     | 5            | 5     | 5    | 1     | 5     |
| IKIJIX     | 5            | 5     | 5    | 5     | 5     |
| JIRSUB     | 3            | 3     | 3    | 3     |       |
| OCAHAE     | 5            | 5     | 5    | 5     | 5     |
| OCAHEI     | 5            | 5     | 5    | 5     | 5     |
| POGXUG     | 5            | 5     | 5    | 1     | 5     |
| QAHVIE     | 5            | 5     | 5    | 1     | 1     |
| QOPBIH     | 5            | 5     | 5    | 3     | 5     |
| RUWZUF     | 5            | 5     | 5    | 3     | 3     |
| SAKWIM     | 5            | 5     | 5    | 5     | 5     |
| SUVROS     | 5            | 5     | 5    | 5     | 5     |
| YIMHOT     | 5            | 5     | 5    | 5     |       |
| YUMVUX     | 5            | 5     | 5    | 3     |       |

Table S27: PBE0/def2-TZVP electronic energy results for Co(II) complexes

| Identifier | Doublet energy (Hartrees) | Quartet energy (Hartrees) |
|------------|---------------------------|---------------------------|
| BIHGEE     | -4374.008609              | -4374.040674              |
| BIHGII     | -8601.606037              | -8601.638169              |
| BUQVOY     | -4466.950895              | -4466.968942              |
| CETBOV     | -8792.233980              | -8792.266324              |
| CETBUB     | -4626.171810              | -4626.200653              |
| CTPYCO     | -3044.705150              | -3044.726221              |
| DAHROU     | -2740.210809              | -2740.226574              |
| FUFVUX     | -2912.038439              | -2912.076079              |
| JAWJAT     | -2795.313029              | -2795.334804              |
| JUWPIA     | -3589.927816              | -3589.922239              |
| KIQREL     | -7919.828171              | -7919.855364              |
| KIQRIP     | -8812.578296              | -8812.603265              |
| KIQROV     | -3213.622953              | -3213.642647              |
| LEGWAW     | -4545.450535              | -4545.479350              |
| OZIMIV     | -2544.192475              | -2544.196677              |
| PEBSEW     | -3097.983121              | -3098.006277              |
| PEBSOG     | -3591.768735              | -3591.790562              |
| PEBSUM     | -3367.643195              | -3367.663862              |
| RIPSEO     | -3234.718368              | -3234.704993              |
| RIP SIS    | -3080.047243              | -3080.036231              |
| SAPBIV     | -3061.965062              | -3062.002649              |
| SEQFIE     | -2941.737624              | -2941.776996              |
| TPORCP     | -3293.645562              | -3293.636387              |
| TUBTIT     | -2117.332527              | -2117.333589              |
| UKUJUG     | -2655.796293              | -2655.826657              |
| VIYGIU     | -2871.433268              | -2871.453672              |
| XIZLUO     | -3430.337247              | -3430.363539              |
| YUDGUA     | -4564.636090              | -4564.668109              |

Table S28: B3LYP/def2-TZVP electronic energy results for Co(II) complexes

| Identifier | Doublet energy (Hartrees) | Quartet energy (Hartrees) |
|------------|---------------------------|---------------------------|
| BIHGEE     | -4375.322286              | -4375.351554              |
| BIHGII     | -8603.088352              | -8603.117851              |
| BUQVOY     | -4468.327349              | -4468.344031              |
| CETBOV     | -8793.808530              | -8793.838258              |
| CETBUB     | -4627.685944              | -4627.712272              |
| CTPYCO     | -3045.493087              | -3045.508803              |
| DAHROU     | -2741.171779              | -2741.181054              |
| FUFVUX     | -2912.738493              | -2912.772732              |
| JAWJAT     | -2796.306629              | -2796.325568              |
| JUWPIA     | -3590.994788              | -3590.982633              |
| KIQREL     | -7921.150132              | -7921.172946              |
| KIQRIP     | -8814.390261              | -8814.412890              |
| KIQROV     | -3214.840584              | -3214.855064              |
| LEGWAW     | -4546.925659              | -4546.950171              |
| OZIMIV     | -2545.024892              | -2545.023414              |
| PEBSEW     | -3099.142660              | -3099.160833              |
| PEBSOG     | -3593.207764              | -3593.223682              |
| PEBSUM     | -3368.957093              | -3368.972012              |
| RIPSEO     | -3235.754756              | -3235.736397              |
| RIP SIS    | -3080.995479              | -3080.979904              |
| SAPBIV     | -3062.753988              | -3062.788336              |
| SEQFIE     | -2942.467730              | -2942.504342              |
| TPORCP     | -3294.876579              | -3294.861289              |
| TUBTIT     | -2117.904852              | -2117.901644              |
| UKUJUG     | -2656.677760              | -2656.704508              |
| VIYGIU     | -2872.466502              | -2872.480201              |
| XIZLUO     | -3431.411782              | -3431.434173              |
| YUDGUA     | -4566.041891              | -4566.071191              |

Table S29: TPSSh/def2-TZVP electronic energy results for Co(II) complexes

| Identifier | Doublet energy (Hartrees) | Quartet energy (Hartrees) |
|------------|---------------------------|---------------------------|
| BIHGEE     | -4376.670529              | -4376.694584              |
| BIHGII     | -8604.358647              | -8604.382809              |
| BUQVOY     | -4469.813744              | -4469.819282              |
| CETBOV     | -8795.197264              | -8795.222077              |
| CETBUB     | -4629.251741              | -4629.271217              |
| CTPYCO     | -3046.229604              | -3046.233029              |
| DAHROU     | -2741.945779              | -2741.950636              |
| FUFVUX     | -2913.379996              | -2913.412475              |
| JAWJAT     | -2797.248289              | -2797.258356              |
| JUWPIA     | -3592.107658              | -3592.089334              |
| KIQREL     | -7922.222978              | -7922.238147              |
| KIQRIP     | -8816.081896              | -8816.091012              |
| KIQROV     | -3216.113497              | -3216.120132              |
| LEGWAW     | -4548.331725              | -4548.351078              |
| OZIMIV     | -2545.808724              | -2545.799288              |
| PEBSEW     | -3100.252908              | -3100.265081              |
| PEBSOG     | -3594.644999              | -3594.654519              |
| PEBSUM     | -3370.289215              | -3370.299338              |
| RIPSEO     | -3236.890818              | -3236.864707              |
| RIP SIS    | -3082.018234              | -3082.013132              |
| SAPBIV     | -3063.483155              | -3063.515836              |
| SEQFIE     | -2943.087821              | -2943.122789              |
| TPORCP     | -3296.297799              | -3296.277535              |
| TUBTIT     | -2118.521627              | -2118.506614              |
| UKUJUG     | -2657.706219              | -2657.721446              |
| VIYGIU     | -2873.467365              | -2873.475724              |
| XIZLUO     | -3432.275344              | -3432.292549              |
| YUDGUA     | -4567.508782              | -4567.533137              |

Table S30: M06-L/def2-TZVP electronic energy results for Co(II) complexes

| Identifier | Doublet energy (Hartrees) | Quartet energy (Hartrees) |
|------------|---------------------------|---------------------------|
| BIHGEE     | -4376.235283              | -4376.256165              |
| BIHGII     | -8603.945869              | -8603.966155              |
| BUQVOY     | -4469.585359              | -4469.582554              |
| CETBOV     | -8794.756805              | -8794.775540              |
| CETBUB     | -4628.775674              | -4628.783668              |
| CTPYCO     | -3045.980892              | -3045.982206              |
| DAHROU     | -2741.687819              | -2741.688313              |
| FUFVUX     | -2913.153563              | -2913.182321              |
| JAWJAT     | -2796.943801              | -2796.948432              |
| JUWPIA     | -3591.760035              | -3591.741398              |
| KIQREL     | -7921.878568              | -7921.891493              |
| KIQRIP     | -8815.590321              | -8815.596632              |
| KIQROV     | -3215.729292              | -3215.731477              |
| LEGWAW     | -4547.878947              | -4547.890622              |
| OZIMIV     | -2545.546288              | -2545.535952              |
| PEBSEW     | -3099.899465              | -3099.904402              |
| PEBSOG     | -3594.203984              | -3594.209128              |
| PEBSUM     | -3369.862083              | -3369.866621              |
| RIPSEO     | -3236.531708              | -3236.511047              |
| SAPBIV     | -3063.226836              | -3063.255697              |
| SEQFIE     | -2942.864639              | -2942.898425              |
| TPORCP     | -3295.850305              | -3295.826071              |
| TUBTIT     | -2118.319333              | -2118.303953              |
| UKUJUG     | -2657.382470              | -2657.399285              |
| VIYGIU     | -2873.143943              | -2873.147298              |
| YUDGUA     | -4567.046276              | -4567.064725              |

Table S31: Spin state predictions for Co(II). Green coloured boxes denote correctly predicted spin state, red coloured boxes denote incorrectly predicted spin state, white coloured box denote failed calculation.

| Identifier | Multiplicity | B3LYP | PBE0 | TPSSh | M06-L |
|------------|--------------|-------|------|-------|-------|
| BIHGEE     | 4            | 4     | 4    | 4     | 4     |
| BIHGII     | 4            | 4     | 4    | 4     | 4     |
| BUQVOY     | 2            | 4     | 4    | 4     | 2     |
| CETBOV     | 4            | 4     | 4    | 4     | 4     |
| CETBUB     | 4            | 4     | 4    | 4     | 4     |
| CTPYCO     | 4            | 4     | 4    | 4     | 4     |
| DAHROU     | 4            | 4     | 4    | 4     | 4     |
| FUFVUX     | 4            | 4     | 4    | 4     | 4     |
| JAWJAT     | 4            | 4     | 4    | 4     | 4     |
| JUWPJA     | 2            | 2     | 2    | 2     | 2     |
| KIQREL     | 4            | 4     | 4    | 4     | 4     |
| KIQRIP     | 4            | 4     | 4    | 4     | 4     |
| KIQROV     | 4            | 4     | 4    | 4     | 4     |
| LEGWAW     | 4            | 4     | 4    | 4     | 4     |
| OZIMIV     | 4            | 2     | 4    | 2     | 2     |
| PEBSEW     | 4            | 4     | 4    | 4     | 4     |
| PEBSOG     | 4            | 4     | 4    | 4     | 4     |
| PEBSUM     | 4            | 4     | 4    | 4     | 4     |
| RIPSEO     | 2            | 2     | 2    | 2     | 2     |
| RIPSIS     | 2            | 2     | 2    | 2     |       |
| SAPBIV     | 4            | 4     | 4    | 4     | 4     |
| SEQFIE     | 4            | 4     | 4    | 4     | 4     |
| TPORCP     | 2            | 2     | 2    | 2     | 2     |
| TUBTIT     | 2            | 2     | 4    | 2     | 2     |
| UKUJUG     | 4            | 4     | 4    | 4     | 4     |
| VIYGIU     | 4            | 4     | 4    | 4     | 4     |
| XIZLUO     | 4            | 4     | 4    | 4     |       |
| YUDGUA     | 4            | 4     | 4    | 4     | 4     |

## 2.1.2 Analysis of optimised structures and their spin states

Table S32: Categorising the geometries of 5-coordinate complexes with Addison's  $\tau$  index.<sup>118</sup>

| Identifier | Metal Center | Multiplicity | Closest Point Group | Addison's $\tau$ index |
|------------|--------------|--------------|---------------------|------------------------|
| CTPYCO     | Co(II)       | 4            | $D_{3h}$            | 0.50                   |
| MOL1DT     | Co(II)       | 4            | $D_{3h}$            | 0.88                   |
| CELVEU     | Fe(III)      | 6            | $C_{4v}$            | 0.58                   |
| ELIRUN     | Fe(III)      | 6            | $C_{4v}$            | 0.48                   |
| GEDTUE     | Fe(III)      | 4            | $C_{4v}$            | 0.57                   |
| IXUNIY     | Fe(III)      | 4            | $C_{4v}$            | 0.57                   |
| KANYUT     | Fe(III)      | 6            | $C_{4v}$            | 0.48                   |
| LUJNOV     | Fe(III)      | 6            | $D_{3h}$            | 0.93                   |
| OETPFE     | Fe(III)      | 4            | $C_{4v}$            | 0.25                   |
| QOXVUW     | Fe(III)      | 6            | $D_{3h}$            | 0.63                   |
| SAVHIG     | Fe(III)      | 6            | $D_{3h}$            | 0.97                   |
| SELQIJ     | Fe(III)      | 4            | $C_{4v}$            | 0.65                   |
| TISDUU     | Fe(III)      | 4            | $C_{4v}$            | 0.30                   |
| WUQBAN     | Fe(III)      | 6            | $D_{3h}$            | 0.58                   |
| OKUXUO     | Mn(II)       | 6            | $D_{3h}$            | 0.83                   |

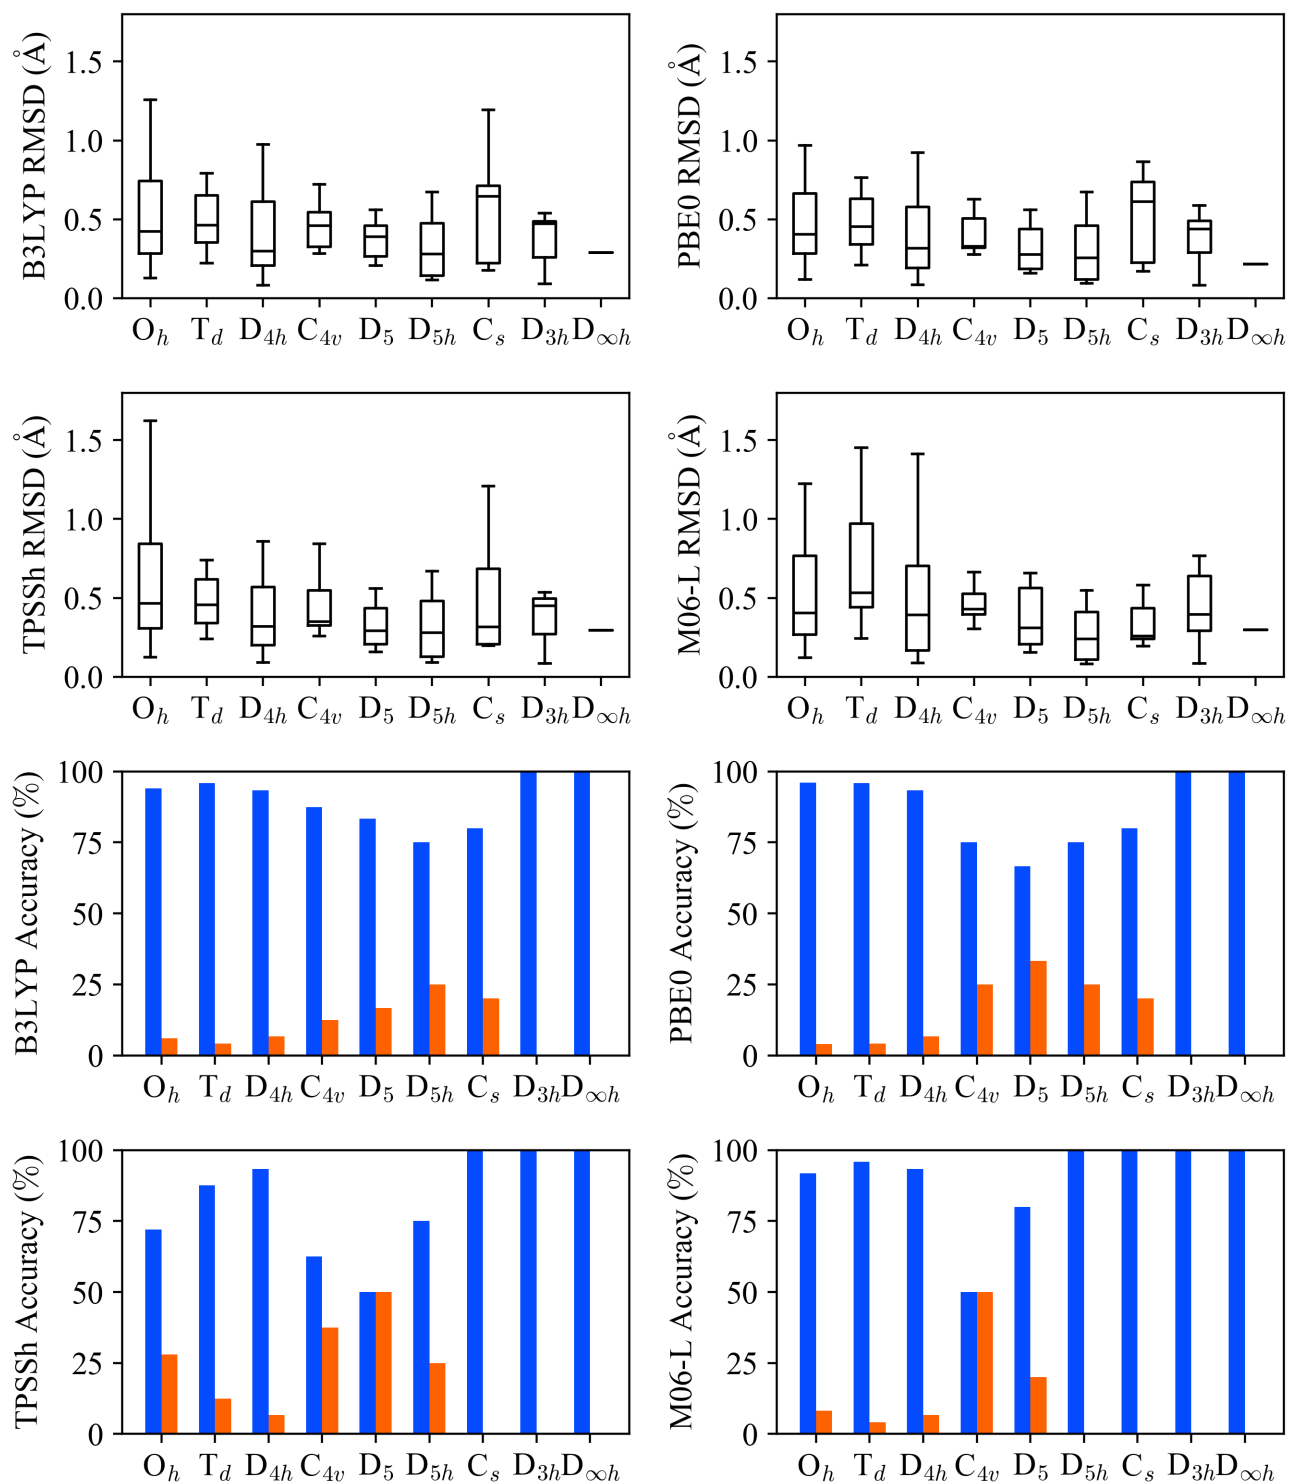

Figure S1: Top Half: Box plots showing the of RMSD values of DFT optimised geometries against XRD geometries across the different types of coordination environments and DFT methods. Bottom Half: Prediction accuracy of the various DFT methods across the different types of metal complex geometries, blue indicates correctly predicted ground state multiplicity and orange indicates incorrectly predicted ground state multiplicity.

### 2.1.3 $\omega$ B97X-D2/def2-TZVP Results

Table S33: Electronic energy (Hartrees) results for Cr(II) and predicted multiplicity. Green boxes denote correctly predicted spin state and red boxes denote incorrectly predicted spin state.

| Identifier | Singlet Energy | Triplet Energy | Quintet Energy | Predicted Multiplicity |
|------------|----------------|----------------|----------------|------------------------|
| CAMVER     | -2965.955172   | -2965.999181   | -2965.982692   | 3                      |
| CIDVOA     | -2222.609919   | -2222.654104   | -2222.732286   | 5                      |
| KAPPEW     | -3123.041583   | -3123.101      | -3123.160284   | 5                      |
| LESMAX     | -1509.951327   | -1510.042339   | -1510.031809   | 3                      |
| OKIJUQ     | -1893.307298   | -1893.33705    | -1893.399146   | 5                      |
| PIXXEE     | -1755.8567     | -1755.776269   | -1755.850761   | 1                      |
| SOFXAM     | -2712.377851   | -2712.408296   | -2712.476013   | 5                      |

Table S34: Electronic energy (Hartrees) results for Mn(II) and predicted multiplicity. Green boxes denote correctly predicted spin state and red boxes denote incorrectly predicted spin state.

| Identifier | Doublet Energy | Quartet Energy | Sextet Energy | Predicted Multiplicity |
|------------|----------------|----------------|---------------|------------------------|
| AXUMEL     | -5691.314979   | -5691.317417   | -5691.291232  | 4                      |
| BIKZUQ     | -3037.913493   | -3037.922155   | -3037.970841  | 6                      |
| NUYZIS     | -2968.828331   | -2968.856848   | -2968.896004  | 6                      |
| ODIZEG     | -2771.998506   | -2771.999511   | -2772.00754   | 6                      |
| TUSBIT     | -2438.261703   | -2438.279874   | -2438.340206  | 6                      |

Table S35: Electronic energy (Hartrees) results for Fe(III) and predicted multiplicity. Green boxes denote correctly predicted spin state and red boxes denote incorrectly predicted spin state.

| Identifier | Doublet Energy | Quartet Energy | Sextet Energy | Predicted Multiplicity |
|------------|----------------|----------------|---------------|------------------------|
| CELVEU     | -3399.44723    | -3399.471247   | -3399.483534  | 6                      |
| CEQPOF     | -2339.066817   | -2339.059844   | -2339.049553  | 2                      |
| FEACAC     | -2299.24961    | -2299.244484   | -2299.271302  | 6                      |
| GEDTUE     | -3814.021912   | -3814.059402   | -3814.057749  | 4                      |
| LUJNOV     | -3318.189184   | -3318.205055   | -3318.232842  | 6                      |
| OQODEE     | -3367.306679   | -3367.318894   | -3367.341538  | 6                      |
| POGXEQ     | -3206.262347   | -3206.262063   | -3206.295668  | 6                      |
| UHEZOX     | -2775.169232   | -2775.158965   | -2775.179299  | 6                      |
| UHIBAP     | -2407.758294   | -2407.726603   | -2407.753613  | 2                      |
| UWIIQIB    | -2946.658507   | -2946.653437   | -2946.686816  | 6                      |

Table S36: Electronic energy (Hartrees) results for Fe(II) and predicted multiplicity. Green boxes denote correctly predicted spin state and red boxes denote incorrectly predicted spin state.

| Identifier | Singlet Energy | Triplet Energy | Quintet Energy | Predicted Multiplicity |
|------------|----------------|----------------|----------------|------------------------|
| SUVROS     | -3313.656935   | -3313.675263   | -3313.721674   | 5                      |

Table S37: Electronic energy (Hartrees) results for Co(II) and predicted multiplicity. Green boxes denote correctly predicted spin state and red boxes denote incorrectly predicted spin state.

| Identifier | Doublet Energy | Quartet Energy | Predicted Multiplicity |
|------------|----------------|----------------|------------------------|
| CTPYCO     | -3045.686734   | -3045.710095   | 4                      |
| SAPBIV     | -3062.936451   | -3062.991282   | 4                      |
| SEQFIE     | -2942.659895   | -2942.645093   | 2                      |
| TUBTIT     | -2117.95646    | -2117.952764   | 2                      |
| XIZLUO     | -3431.60814    | -3431.635269   | 4                      |

Table S38: P1-score and calculation success rate of  $\omega$ B97X-D2/def2-TZVP calculations.

| Metal centre     | Cr(II) | Mn(II) | Fe(III) | Fe(II) | Co(II) |
|------------------|--------|--------|---------|--------|--------|
| P1-score (%)     | 71     | 60     | 100     | 100    | 80     |
| Success rate (%) | 39     | 13     | 36      | 4      | 18     |

#### 2.1.4 Spin Contamination Analysis

Table S39: Proportion (%) of complexes with calculated spin deviation values exceeding 10% error of the spin expectation value.

| Method     | B3LYP | PBE0 | TPSSh | M06-L |
|------------|-------|------|-------|-------|
| Cr(II)     | 26    | 31   | 29    | 31    |
| Mn(II)     | 25    | 34   | 29    | 34    |
| Fe(III)    | 21    | 24   | 23    | 14    |
| Fe(II)     | 17    | 15   | 15    | 13    |
| Co(II)     | 34    | 38   | 20    | 13    |
| All Metals | 25    | 29   | 23    | 21    |

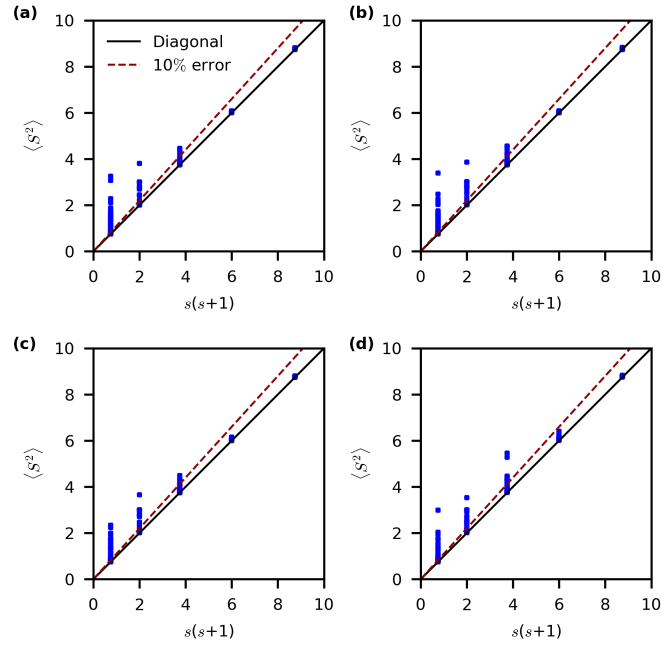

Figure S2: Scatter plot comparing  $\langle S^2 \rangle$  deviations across four DFT methods as a function of ideal spin expectation values  $S(S+1)$ . Red line represent the 10% spin deviation error tolerance for reference.

## 3 Prediction of $T_{SCO}$ with DFT methods

### 3.1 Thermodynamic results

#### 3.1.1 Results with B3LYP

Table S40: B3LYP/def2-TZVP calculated entropies, enthalpies ( $\text{J}\cdot\text{mol}^{-1}\cdot\text{K}^{-1}$ ,  $\text{kJ}\cdot\text{mol}^{-1}$ ) and  $T_{SCO}$  (K) values.

| Identifier | Exp $\Delta S$ | Comp $\Delta S$ | Exp $\Delta H$ | Comp $\Delta H$ | Exp $T_{SCO}$ | Comp $T_{SCO}$ |
|------------|----------------|-----------------|----------------|-----------------|---------------|----------------|
| BAXFIS02   |                | 60              |                | -7.6            | 333           | -127           |
| HALC-1     | 101.0          | 59              | 24.1           | -18.8           | 248           | -320           |
| HALC-13    | 90.0           | 57              | 21.2           | -21.0           | 234           | -366           |
| HALC-3     |                | 56              |                | -19.9           | 213           | -356           |
| HALC-20    | 78.0           | 55              | 20.1           | -21.4           | 259           | -386           |
| HALC-12    | 96.0           | 58              | 21.9           | -21.4           | 226           | -370           |
| HALC-4     | 146.0          | 57              | 40.9           | -18.1           | 281           | -320           |
| HALC-11    |                | 58              |                | -22.7           | 215           | -390           |
| HALC-14    | 98.0           | 58              | 23.2           | -20.4           | 236           | -354           |
| HALC-2     |                | 58              |                | -20.1           | 216           | -348           |
| HALC-7     | 67.0           | 57              | 20.6           | -20.0           | 309           | -353           |
| HALC-9     |                | 65              |                | -23.2           | 164           | -357           |
| HALC-10    |                | 60              |                | -22.5           | 158           | -375           |
| HALC-8     |                | 57              |                | -23.4           | 215           | -413           |
| HALC-15    |                | 57              |                | -22.9           | 246           | -401           |
| HALC-16    |                | 58              |                | -23.3           | 194           | -403           |
| HALC-18    | 112.0          | 56              | 33.0           | -19.1           | 294           | -342           |
| HALC-17    | 81.0           | 57              | 23.0           | -19.6           | 284           | -346           |
| HALC-27    |                | 57              |                | -20.4           | 238           | -361           |
| HALC-23    | 99.0           | 56              | 25.7           | -18.0           | 259           | -320           |
| HALC-26    |                | 57              |                | -20.7           | 231           | -364           |
| HALC-25    | 99.0           | 57              | 24.4           | -15.8           | 246           | -278           |
| HALC-28    | 80.0           | 56              | 19.2           | -19.5           | 237           | -351           |
| HALC-22    | 96.0           | 58              | 26.4           | -17.7           | 273           | -305           |
| HALC-24    | 76.0           | 52              | 19.0           | -16.9           | 251           | -325           |
| HPZBFE     |                | 60              |                | -3.8            | 393           | -64            |
| KEKVIF03   |                | 61              |                | -35.9           | 176           | -593           |
| NEFSUM02   |                | 62              |                | -23.8           | 160           | -382           |
| WAHKEX     |                | 58              |                | -48.9           | 184           | -847           |

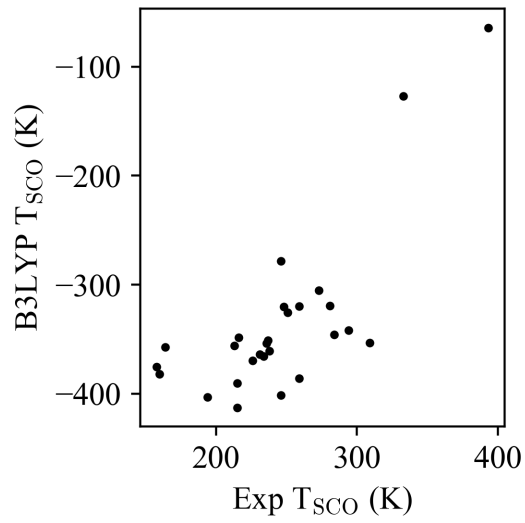

Figure S3: Predicted *vs* calculated  $T_{SCO}$  using B3LYP/def2-TZVP.

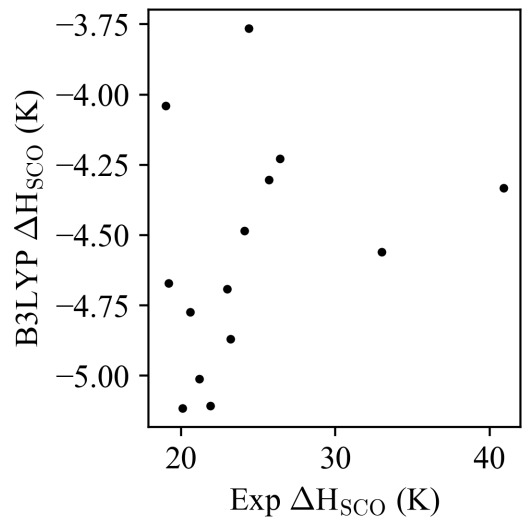

Figure S4: Predicted *vs* calculated  $\Delta H_{SCO}$  using B3LYP/def2-TZVP.

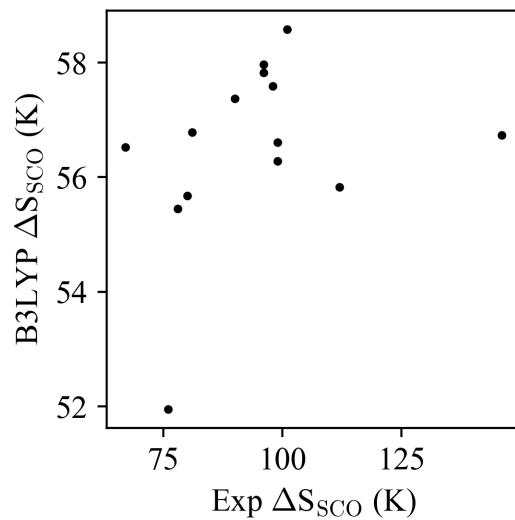

Figure S5: Predicted *vs* calculated  $\Delta S_{SCO}$  using B3LYP/def2-TZVP.

### 3.1.2 Results with M06-L

Table S41: M06-L/def2-TZVP calculated entropies, enthalpies ( $\text{J}\cdot\text{mol}^{-1}\cdot\text{K}^{-1}$ ,  $\text{kJ}\cdot\text{mol}^{-1}$ ) and  $T_{\text{SCO}}$  (K) values.

| Identifier | Exp $\Delta S$ | Comp $\Delta S$ | Exp $\Delta H$ | Comp $\Delta H$ | Exp $T_{\text{SCO}}$ | Comp $T_{\text{SCO}}$ |
|------------|----------------|-----------------|----------------|-----------------|----------------------|-----------------------|
| BAXFIS02   |                | 59              |                | 31.9            | 333                  | 544                   |
| HALC-1     | 101.0          | 51              | 24.1           | 9.8             | 248                  | 190                   |
| HALC-13    | 90.0           | 50              | 21.2           | 7.2             | 234                  | 143                   |
| HALC-3     |                | 49              |                | 7.1             | 213                  | 144                   |
| HALC-12    | 96.0           | 51              | 21.9           | 6.8             | 226                  | 133                   |
| HALC-11    |                | 51              |                | 5.4             | 215                  | 106                   |
| HALC-14    | 98.0           | 50              | 23.2           | 7.7             | 236                  | 156                   |
| HALC-2     |                | 46              |                | 8.3             | 216                  | 180                   |
| HALC-9     |                | 59              |                | 2.1             | 164                  | 35                    |
| HALC-10    |                | 49              |                | 3.6             | 158                  | 72                    |
| HALC-8     |                | 51              |                | 6.2             | 215                  | 120                   |
| HALC-16    |                | 53              |                | 3.6             | 194                  | 68                    |
| HALC-18    | 112.0          | 55              | 33.0           | 7.4             | 294                  | 135                   |
| HALC-17    | 81.0           | 52              | 23.0           | 9.0             | 284                  | 174                   |
| HALC-27    |                | 50              |                | 8.1             | 238                  | 163                   |
| HALC-23    | 99.0           | 47              | 25.7           | 11.5            | 259                  | 243                   |
| HALC-26    |                | 50              |                | 7.3             | 231                  | 148                   |
| HALC-25    | 99.0           | 49              | 24.4           | 13.6            | 246                  | 279                   |
| HALC-28    | 80.0           | 48              | 19.2           | 9.3             | 237                  | 196                   |
| HALC-22    | 96.0           | 53              | 26.4           | 11.5            | 273                  | 219                   |
| HALC-24    | 76.0           | 56              | 19.0           | 15.1            | 251                  | 271                   |
| HPZBFE     |                | 62              |                | 36.1            | 393                  | 584                   |
| KEKVIF03   |                | 41              |                | -20.8           | 176                  | -507                  |
| NEFSUM02   |                | 52              |                | 4.8             | 160                  | 92                    |
| WAHKEX     |                | 55              |                | -33.1           | 184                  | -597                  |

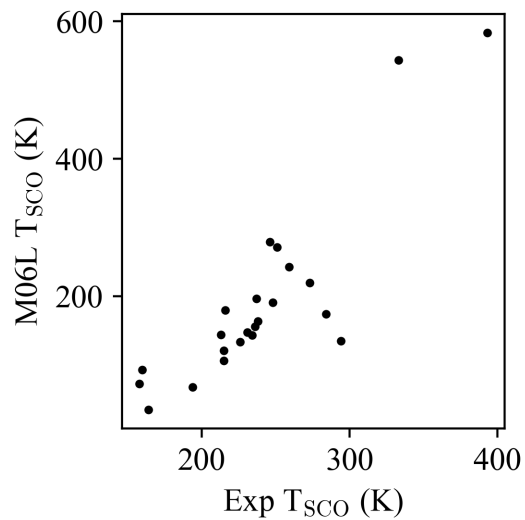

Figure S6: Predicted *vs* calculated  $T_{SCO}$  using M06-L/def2-TZVP.

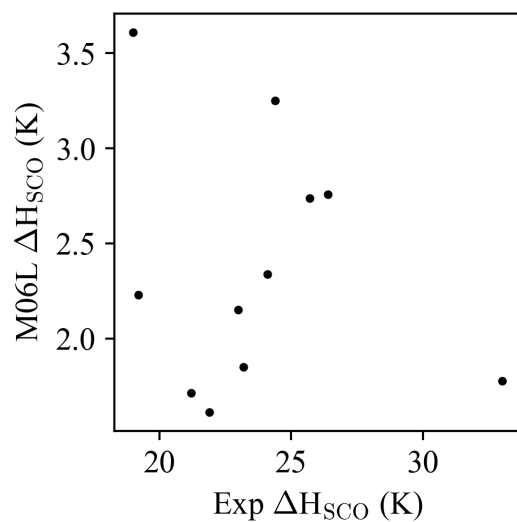

Figure S7: Predicted *vs* calculated  $\Delta H_{SCO}$  using M06-L/def2-TZVP.

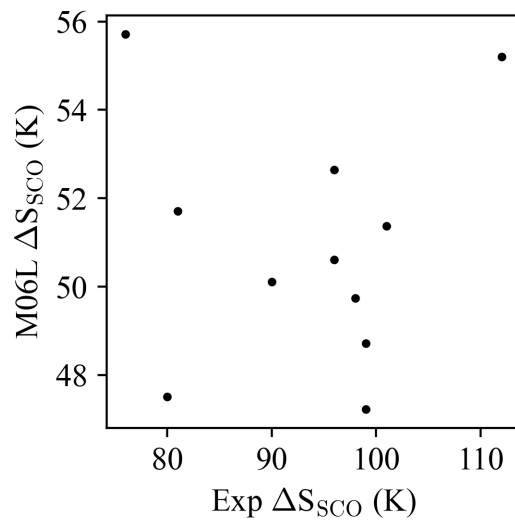

Figure S8: Predicted *vs* calculated  $\Delta S_{SCO}$  using M06-L/def2-TZVP.

### 3.1.3 Results with PBE0

Table S42: PBE0/def2-TZVP calculated entropies, enthalpies ( $\text{J.mol}^{-1}.\text{K}^{-1}$ ,  $\text{kJ.mol}^{-1}$ ) and  $T_{\text{SCO}}$  (K) values.

| Identifier | Exp $\Delta S$ | Comp $\Delta S$ | Exp $\Delta H$ | Comp $\Delta H$ | Exp $T_{\text{SCO}}$ | Comp $T_{\text{SCO}}$ |
|------------|----------------|-----------------|----------------|-----------------|----------------------|-----------------------|
| BAXFIS02   |                | 62              |                | -25.6           | 333                  | -411                  |
| HALC-1     | 101.0          | 60              | 24.1           | -39.7           | 248                  | -657                  |
| HALC-13    | 90.0           | 59              | 21.2           | -42.1           | 234                  | -718                  |
| HALC-3     |                | 57              |                | -41.0           | 213                  | -722                  |
| HALC-20    | 78.0           | 56              | 20.1           | -42.3           | 259                  | -756                  |
| HALC-21    | 81.0           | 56              | 21.1           | -41.8           | 261                  | -750                  |
| HALC-12    | 96.0           | 59              | 21.9           | -42.5           | 226                  | -718                  |
| HALC-4     | 146.0          | 58              | 40.9           | -38.9           | 281                  | -667                  |
| HALC-11    |                | 60              |                | -43.9           | 215                  | -735                  |
| HALC-14    | 98.0           | 59              | 23.2           | -41.4           | 236                  | -706                  |
| HALC-2     |                | 60              |                | -41.2           | 216                  | -685                  |
| HALC-7     | 67.0           | 58              | 20.6           | -40.9           | 309                  | -706                  |
| HALC-9     |                | 62              |                | -44.6           | 164                  | -724                  |
| HALC-10    |                | 61              |                | -43.9           | 158                  | -720                  |
| HALC-8     |                | 61              |                | -43.2           | 215                  | -707                  |
| HALC-15    |                | 60              |                | -43.0           | 246                  | -715                  |
| HALC-16    |                | 58              |                | -44.1           | 194                  | -760                  |
| HALC-18    | 112.0          | 57              | 33.0           | -40.0           | 294                  | -700                  |
| HALC-17    | 81.0           | 59              | 23.0           | -40.6           | 284                  | -693                  |
| HALC-27    |                | 58              |                | -41.3           | 238                  | -712                  |
| HALC-23    | 99.0           | 58              | 25.7           | -38.9           | 259                  | -669                  |
| HALC-26    |                | 58              |                | -41.7           | 231                  | -713                  |
| HALC-25    | 99.0           | 58              | 24.4           | -36.6           | 246                  | -633                  |
| HALC-28    | 80.0           | 58              | 19.2           | -40.3           | 237                  | -699                  |
| HALC-22    | 96.0           | 60              | 26.4           | -38.5           | 273                  | -642                  |
| HALC-24    | 76.0           | 53              | 19.0           | -37.7           | 251                  | -715                  |
| HPZBFE     |                | 63              |                | -20.8           | 393                  | -332                  |
| KEKVIF03   |                | 66              |                | -53.6           | 176                  | -810                  |
| NEFSUM02   |                | 64              |                | -42.1           | 160                  | -655                  |
| WAHKEX     |                | 58              |                | -66.8           | 184                  | -1145                 |

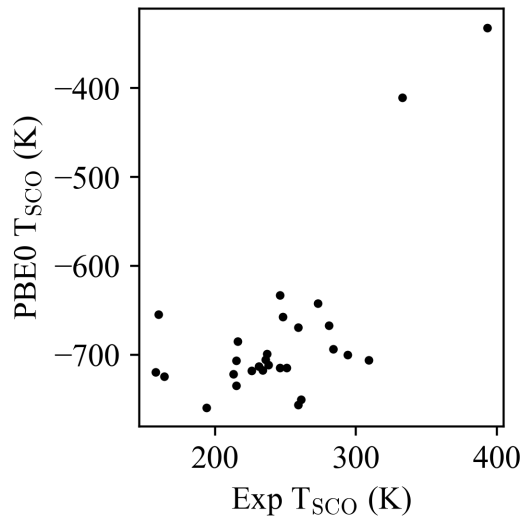

Figure S9: Predicted *vs* calculated  $T_{SCO}$  using PBE0/def2-TZVP.

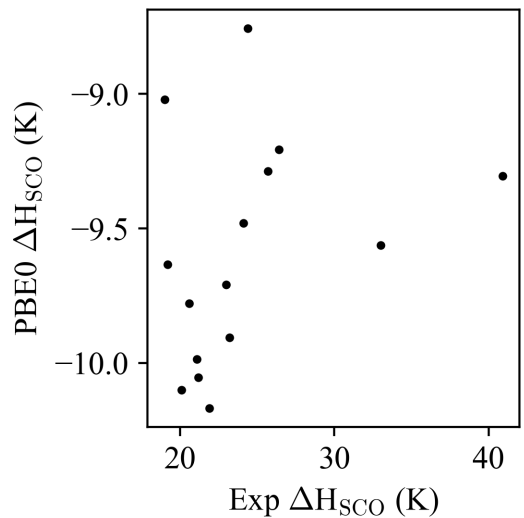

Figure S10: Predicted *vs* calculated  $\Delta H_{SCO}$  using PBE0/def2-TZVP.

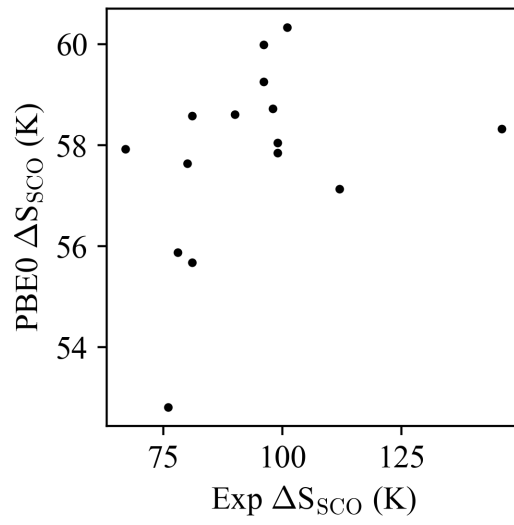

Figure S11: Predicted *vs* calculated  $\Delta S_{SCO}$  using PBE0/def2-TZVP.

### 3.1.4 Results with PBE0-D4

Table S43: PBE0-D4/def2-TZVP calculated entropies, enthalpies ( $\text{J}\cdot\text{mol}^{-1}\cdot\text{K}^{-1}$ ,  $\text{kJ}\cdot\text{mol}^{-1}$ ) and  $T_{\text{SCO}}$  (K) values.

| Identifier | Exp $\Delta S$ | Comp $\Delta S$ | Exp $\Delta H$ | Comp $\Delta H$ | Exp $T_{\text{SCO}}$ | Comp $T_{\text{SCO}}$ |
|------------|----------------|-----------------|----------------|-----------------|----------------------|-----------------------|
| BAXFIS02   |                | 64              |                | -6.3            | 333                  | -98                   |
| HALC-1     | 101.0          | 62              | 24.1           | -20.6           | 248                  | -330                  |
| HALC-13    | 90.0           | 61              | 21.2           | -22.9           | 234                  | -378                  |
| HALC-3     |                | 59              |                | -22.2           | 213                  | -376                  |
| HALC-21    | 81.0           | 56              | 21.1           | -23.2           | 261                  | -414                  |
| HALC-12    | 96.0           | 67              | 21.9           | -23.5           | 226                  | -350                  |
| HALC-4     | 146.0          | 60              | 40.9           | -19.7           | 281                  | -327                  |
| HALC-11    |                | 62              |                | -25.1           | 215                  | -406                  |
| HALC-14    | 98.0           | 61              | 23.2           | -22.2           | 236                  | -365                  |
| HALC-2     |                | 62              |                | -22.1           | 216                  | -355                  |
| HALC-7     | 67.0           | 60              | 20.6           | -21.7           | 309                  | -363                  |
| HALC-9     |                | 63              |                | -25.7           | 164                  | -408                  |
| HALC-10    |                | 63              |                | -24.9           | 158                  | -396                  |
| HALC-8     |                | 62              |                | -24.0           | 215                  | -386                  |
| HALC-15    |                | 62              |                | -23.9           | 246                  | -388                  |
| HALC-16    |                | 60              |                | -24.6           | 194                  | -409                  |
| HALC-18    | 112.0          | 57              | 33.0           | -21.2           | 294                  | -374                  |
| HALC-17    | 81.0           | 60              | 23.0           | -21.3           | 284                  | -353                  |
| HALC-27    |                | 60              |                | -21.3           | 238                  | -354                  |
| HALC-23    | 99.0           | 60              | 25.7           | -19.1           | 259                  | -319                  |
| HALC-26    |                | 61              |                | -22.1           | 231                  | -364                  |
| HALC-25    | 99.0           | 60              | 24.4           | -16.4           | 246                  | -273                  |
| HALC-28    | 80.0           | 60              | 19.2           | -19.7           | 237                  | -329                  |
| HALC-22    | 96.0           | 62              | 26.4           | -18.8           | 273                  | -303                  |
| HALC-24    | 76.0           | 54              | 19.0           | -16.3           | 251                  | -302                  |
| HPZBFE     |                | 65              |                | -0.2            | 393                  | -3                    |
| KEKVIF03   |                | 46              |                | -46.6           | 176                  | -1015                 |
| WAHKEX     |                | 58              |                | -54.2           | 184                  | -928                  |

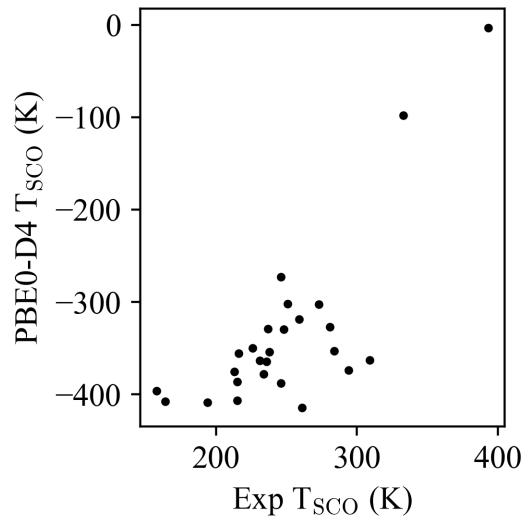

Figure S12: Predicted *vs* calculated  $T_{SCO}$  using PBE0-D4/def2-TZVP.

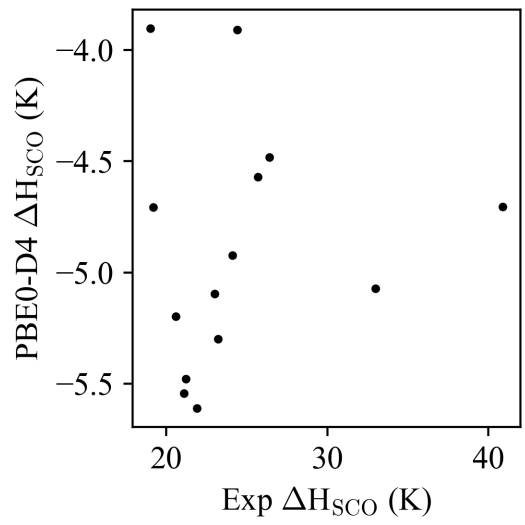

Figure S13: Predicted *vs* calculated  $H_{SCO}$  using PBE0-D4/def2-TZVP.

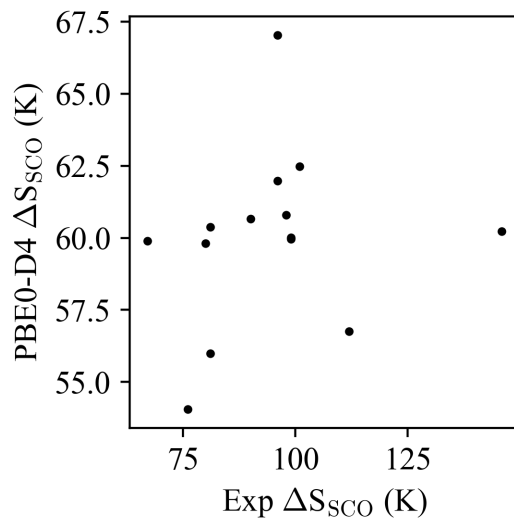

Figure S14: Predicted *vs* calculated  $\Delta S_{SCO}$  using PBE0-D4/def2-TZVP.

### 3.1.5 Results with PBE0-D4 and acetone as solvent

Table S44: PBE0-D4/def2-TZVP with acetone SMD solvent model calculated entropies, enthalpies ( $\text{J.mol}^{-1}.\text{K}^{-1}$ ,  $\text{kJ.mol}^{-1}$ ) and  $T_{SCO}$  (K) values.

| Identifier | Exp $\Delta S$ | Comp $\Delta S$ | Exp $\Delta H$ | Comp $\Delta H$ | Exp $T_{SCO}$ | Comp $T_{SCO}$ |
|------------|----------------|-----------------|----------------|-----------------|---------------|----------------|
| HALC-1     | 101            | 69              | 24.1           | -6.7            | 248           | -407           |
| HALC-12    | 96             | 68              | 21.9           | -7.1            | 226           | -434           |
| HALC-13    | 90             | 65              | 21.2           | -6.9            | 234           | -445           |
| HALC-14    | 98             | 66.1            | 23.2           | -7              | 236           | -441           |
| HALC-16    |                | 58.1            |                | -7.8            | 194           | -560           |
| HALC-17    | 81             | 69.3            | 23             | -7.1            | 284           | -430           |
| HALC-19    | 79             | 57.8            | 19.4           | -7.3            | 245           | -527           |
| HALC-25    | 99             | 71              | 24.4           | -6.5            | 246           | -381           |
| HALC-28    | 80             | 53              | 19.2           | -7.5            | 237           | -589           |
| HALC-4     | 146            | 65.6            | 40.9           | -6.2            | 281           | -396           |

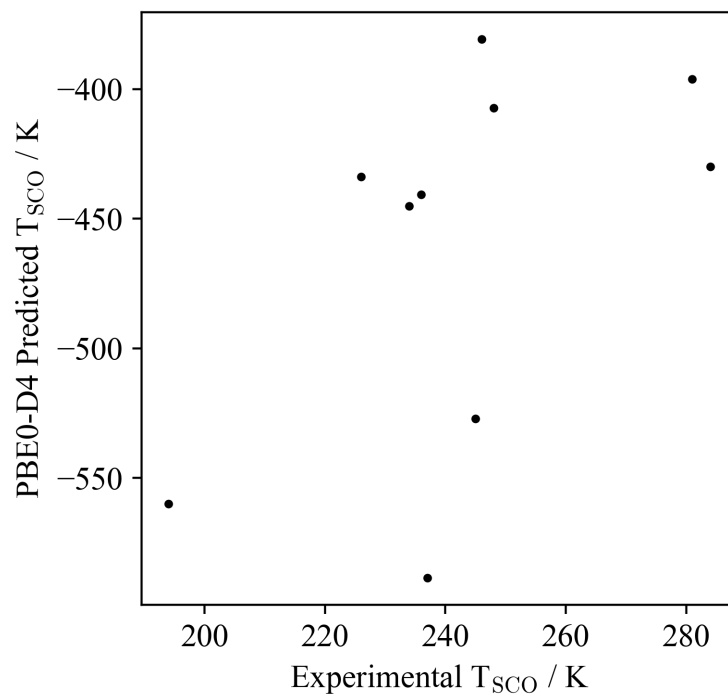

Figure S15: Predicted *vs* calculated  $T_{SCO}$  using PBE0-D4/def2-TZVP and acetone as solvent.

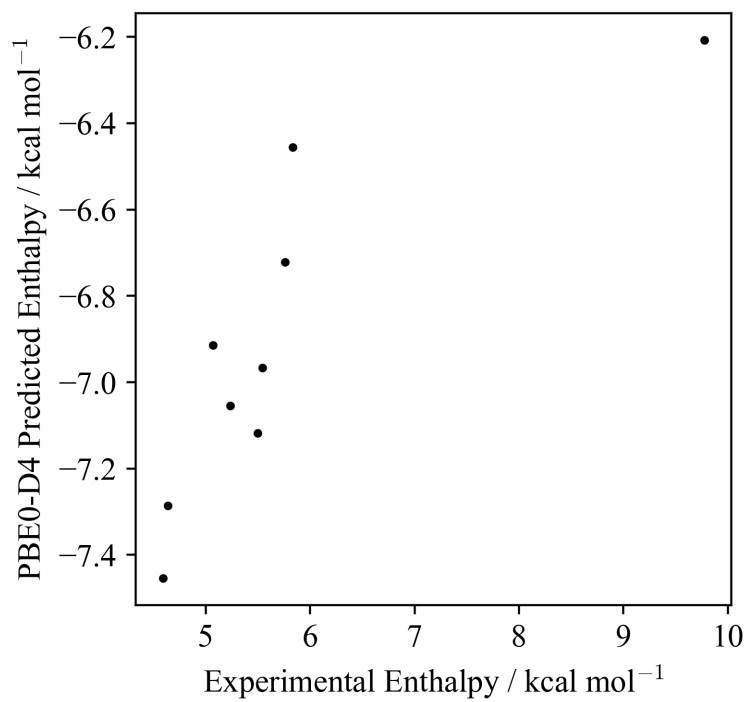

Figure S16: Predicted *vs* calculated  $\Delta H_{SCO}$  using PBE0-D4/def2-TZVP and acetone as solvent.

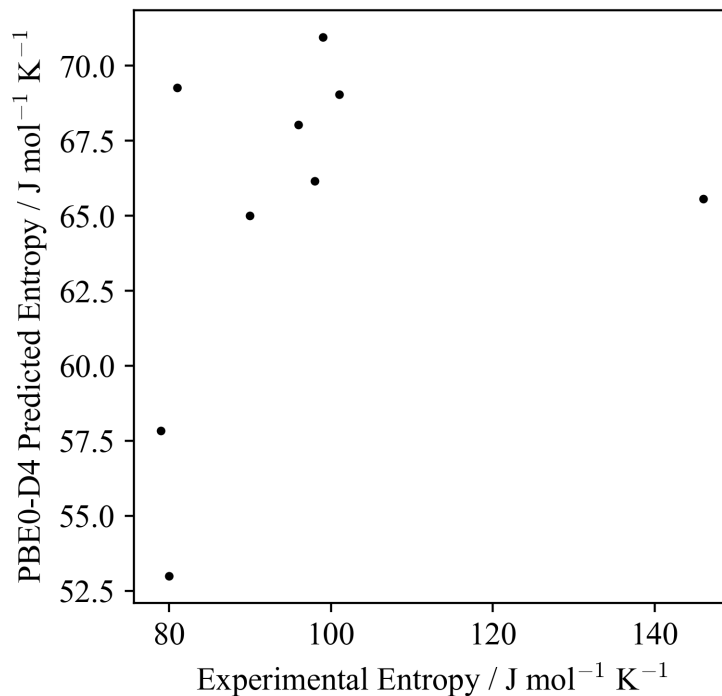

Figure S17: Predicted *vs* calculated  $\Delta S_{SCO}$  using PBE0-D4/def2-TZVP and acetone as solvent.

### 3.1.6 Results with PBE0-D4 and nitromethane as solvent

Table S45: PBE0-D4/def2-TZVP with nitromethane SMD solvent model calculated entropies, enthalpies ( $\text{J}\cdot\text{mol}^{-1}\cdot\text{K}^{-1}$ ,  $\text{kJ}\cdot\text{mol}^{-1}$ ) and  $T_{SCO}$  (K) values.

| Identifier | Exp $\Delta S$ | Comp $\Delta S$ | Exp $\Delta H$ | Comp $\Delta H$ | Exp $T_{SCO}$ | Comp $T_{SCO}$ |
|------------|----------------|-----------------|----------------|-----------------|---------------|----------------|
| HALC-11    |                | 77.8            |                | -7.3            | 215           | -392           |
| HALC-15    |                | 63.9            |                | -7.1            | 246           | -464           |
| HALC-18    | 112            | 56.6            | 33             | -6.1            | 294           | -452           |
| HALC-22    | 96             | 68.8            | 26.4           | -6.5            | 273           | -398           |
| HALC-26    |                | 68.5            |                | -7.1            | 231           | -434           |
| HALC-27    |                | 66              |                | -7.1            | 238           | -448           |

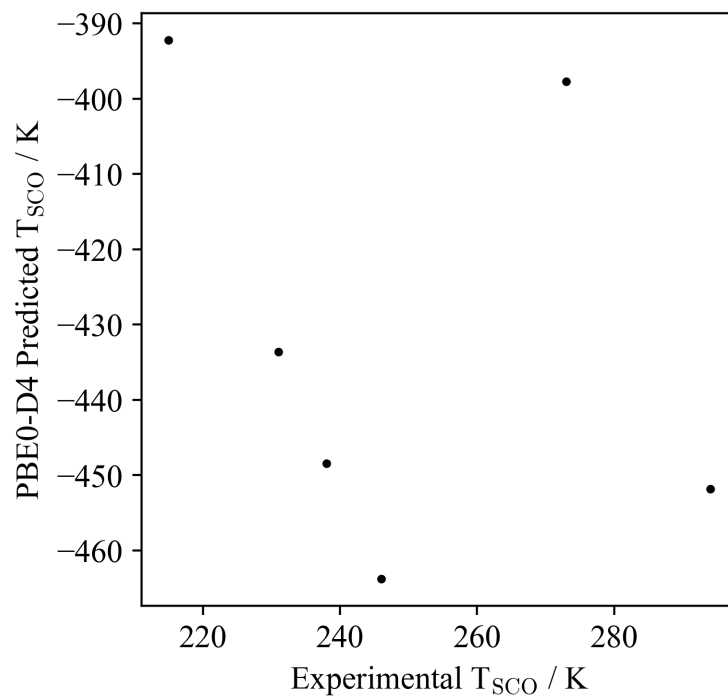

Figure S18: Predicted *vs* calculated  $T_{SCO}$  using PBE0-D4/def2-TZVP and nitromethane as solvent.

### 3.1.7 Results with TPSSh

Table S46: TPSSh/def2-TZVP calculated entropies, enthalpies ( $\text{J}\cdot\text{mol}^{-1}\cdot\text{K}^{-1}$ ,  $\text{kJ}\cdot\text{mol}^{-1}$ ) and  $T_{\text{SCO}}$  (K) values.

| Identifier | Exp $\Delta S$ | Comp $\Delta S$ | Exp $\Delta H$ | Comp $\Delta H$ | Exp $T_{\text{SCO}}$ | Comp $T_{\text{SCO}}$ |
|------------|----------------|-----------------|----------------|-----------------|----------------------|-----------------------|
| BAXFIS02   |                | 67              |                | 50.8            | 333                  | 762                   |
| HALC-1     | 101.0          | 70              | 24.1           | 39.3            | 248                  | 562                   |
| HALC-13    | 90.0           | 63              | 21.2           | 36.5            | 234                  | 579                   |
| HALC-3     |                | 59              |                | 39.4            | 213                  | 670                   |
| HALC-20    | 78.0           | 61              | 20.1           | 37.2            | 259                  | 613                   |
| HALC-12    | 96.0           | 63              | 21.9           | 36.1            | 226                  | 568                   |
| HALC-4     | 146.0          | 62              | 40.9           | 40.8            | 281                  | 657                   |
| HALC-11    |                | 65              |                | 34.4            | 215                  | 533                   |
| HALC-14    | 98.0           | 63              | 23.2           | 37.2            | 236                  | 591                   |
| HALC-2     |                | 64              |                | 37.4            | 216                  | 586                   |
| HALC-7     | 67.0           | 62              | 20.6           | 39.0            | 309                  | 632                   |
| HALC-9     |                | 60              |                | 32.8            | 164                  | 544                   |
| HALC-10    |                | 61              |                | 32.8            | 158                  | 541                   |
| HALC-8     |                | 60              |                | 34.5            | 215                  | 576                   |
| HALC-15    |                | 67              |                | 35.2            | 246                  | 522                   |
| HALC-16    |                | 61              |                | 34.5            | 194                  | 568                   |
| HALC-18    | 112.0          | 61              | 33.0           | 39.7            | 294                  | 650                   |
| HALC-17    | 81.0           | 65              | 23.0           | 38.3            | 284                  | 587                   |
| HALC-27    |                | 63              |                | 37.1            | 238                  | 588                   |
| HALC-23    | 99.0           | 62              | 25.7           | 40.0            | 259                  | 642                   |
| HALC-26    |                | 63              |                | 36.7            | 231                  | 583                   |
| HALC-25    | 99.0           | 63              | 24.4           | 42.8            | 246                  | 680                   |
| HALC-28    | 80.0           | 67              | 19.2           | 38.7            | 237                  | 579                   |
| HALC-22    | 96.0           | 64              | 26.4           | 40.5            | 273                  | 634                   |
| HALC-24    | 76.0           | 60              | 19.0           | 41.7            | 251                  | 700                   |
| HPZBFE     |                | 67              |                | 54.8            | 393                  | 824                   |
| KEKVIF03   |                | 64              |                | 25.0            | 176                  | 392                   |
| NEFSUM02   |                | 64              |                | 34.7            | 160                  | 542                   |
| WAHKEX     |                | 61              |                | 7.4             | 184                  | 122                   |

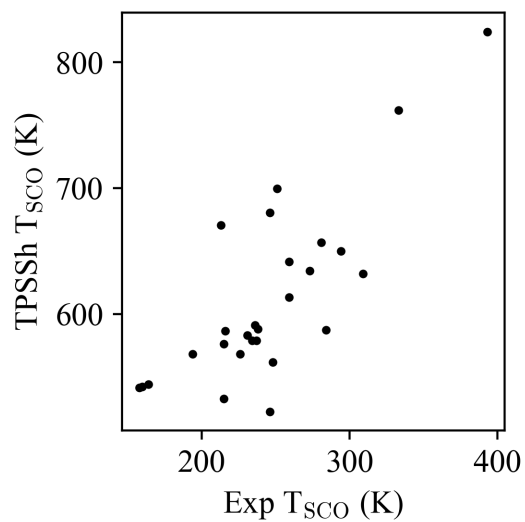

Figure S19: Predicted *vs* calculated  $T_{SCO}$  using TPSSh/def2-TZVP.

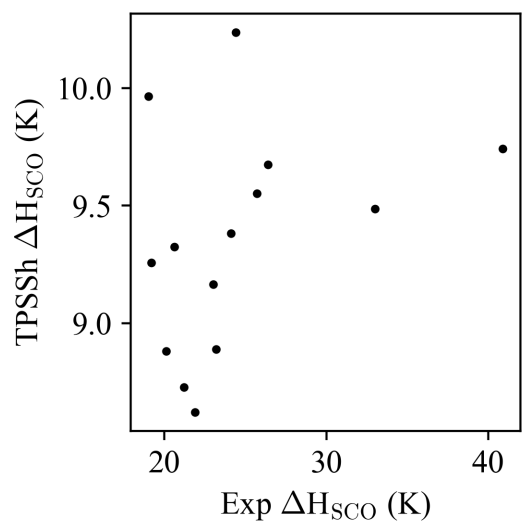

Figure S20: Predicted *vs* calculated  $\Delta H_{SCO}$  using TPSSh/def2-TZVP.

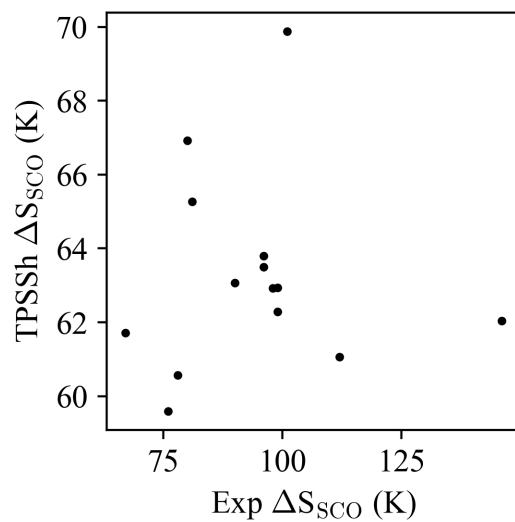

Figure S21: Predicted *vs* calculated  $\Delta S_{SCO}$  using TPSSh/def2-TZVP.

### 3.1.8 Results with r<sup>2</sup>SCAN

Table S47: r<sup>2</sup>SCAN/def2-TZVP calculated entropies, enthalpies (J.mol<sup>-1</sup>.K<sup>-1</sup>, kJ.mol<sup>-1</sup>) and T<sub>SCO</sub> (K) values.

| Identifier | Exp $\Delta S$ | Comp $\Delta S$ | Exp $\Delta H$ | Comp $\Delta H$ | Exp T <sub>SCO</sub> | Comp T <sub>SCO</sub> |
|------------|----------------|-----------------|----------------|-----------------|----------------------|-----------------------|
| BAXFIS02   |                | 70              |                | 57.2            | 333                  | 823                   |
| HALC-1     | 101.0          | 59              | 24.1           | 39.4            | 248                  | 666                   |
| HALC-13    | 90.0           | 58              | 21.2           | 36.1            | 234                  | 620                   |
| HALC-3     |                | 54              |                | 38.4            | 213                  | 717                   |
| HALC-20    | 78.0           | 57              | 20.1           | 36.6            | 259                  | 642                   |
| HALC-21    | 81.0           | 57              | 21.1           | 36.2            | 261                  | 637                   |
| HALC-12    | 96.0           | 64              | 21.9           | 35.7            | 226                  | 557                   |
| HALC-4     | 146.0          | 57              | 40.9           | 40.7            | 281                  | 708                   |
| HALC-11    |                | 58              |                | 34.1            | 215                  | 586                   |
| HALC-14    | 98.0           | 58              | 23.2           | 36.8            | 236                  | 632                   |
| HALC-2     |                | 58              |                | 37.2            | 216                  | 645                   |
| HALC-7     | 67.0           | 57              | 20.6           | 38.5            | 309                  | 675                   |
| HALC-9     |                | 59              |                | 32.9            | 164                  | 558                   |
| HALC-10    |                | 59              |                | 33.5            | 158                  | 571                   |
| HALC-8     |                | 59              |                | 34.7            | 215                  | 593                   |
| HALC-15    |                | 58              |                | 34.5            | 246                  | 596                   |
| HALC-16    |                | 58              |                | 34.8            | 194                  | 600                   |
| HALC-18    | 112.0          | 56              | 33.0           | 39.0            | 294                  | 701                   |
| HALC-17    | 81.0           | 58              | 23.0           | 38.0            | 284                  | 650                   |
| HALC-27    |                | 57              |                | 37.0            | 238                  | 653                   |
| HALC-23    | 99.0           | 57              | 25.7           | 40.5            | 259                  | 713                   |
| HALC-26    |                | 57              |                | 36.7            | 231                  | 642                   |
| HALC-25    | 99.0           | 57              | 24.4           | 43.6            | 246                  | 768                   |
| HALC-28    | 80.0           | 57              | 19.2           | 38.0            | 237                  | 670                   |
| HALC-22    | 96.0           | 58              | 26.4           | 41.0            | 273                  | 703                   |
| HALC-24    | 76.0           | 56              | 19.0           | 42.7            | 251                  | 769                   |
| HPZBFE     |                | 70              |                | 62.2            | 393                  | 892                   |
| KEKVIF03   |                | 49              |                | 14.4            | 176                  | 296                   |
| NEFSUM02   |                | 61              |                | 31.3            | 160                  | 514                   |
| WAHKEX     |                | 58              |                | -6.0            | 184                  | -104                  |

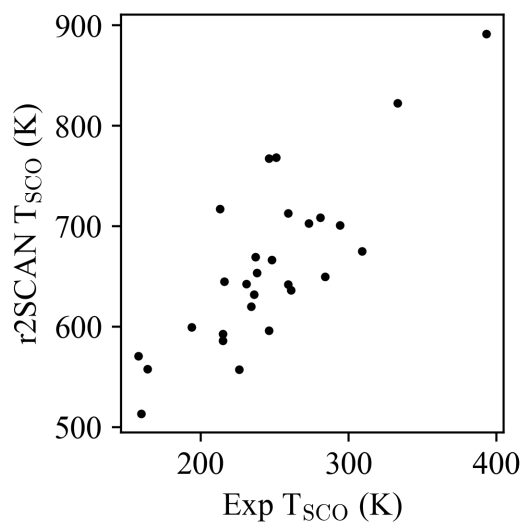

Figure S22: Predicted *vs* calculated  $T_{SCO}$  using r<sup>2</sup>SCAN/def2-TZVP.

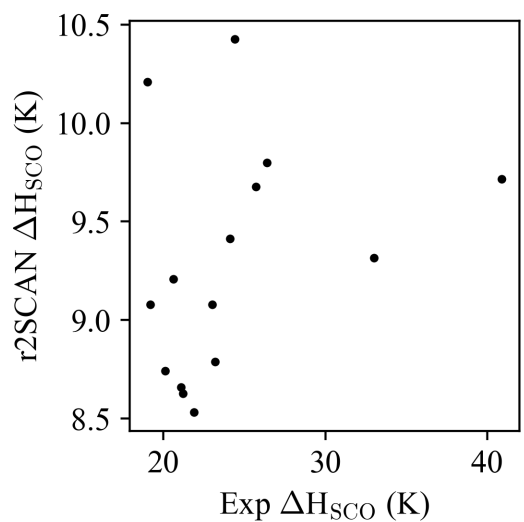

Figure S23: Predicted *vs* calculated  $\Delta H_{SCO}$  using r<sup>2</sup>SCAN/def2-TZVP.

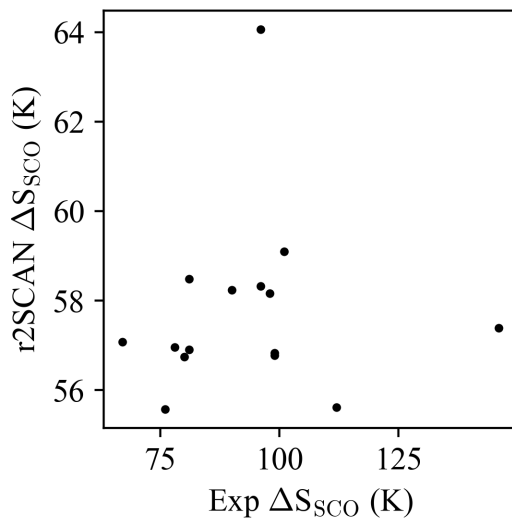

Figure S24: Predicted *vs* calculated  $\Delta S_{SCO}$  using r<sup>2</sup>SCAN/def2-TZVP.

### 3.2 Analysis of optimised structures and prediction metrics

Table S48: Performance of DFT and kestrel prediction of  $T_{SCO}$  of the Fe(II) SCO complexes from both Halcrow and non-Halcrow complexes. WAHKEX and KEKVIF complexes were excluded from this analysis since their  $T_{SCO}$  values are outliers from the general trend. <sup>a</sup>Comparison of change in entropy and enthalpy values are exclusively for the 16 Halcrow complexes with experimental entropy and enthalpy values. <sup>b</sup>SMD acetone solvent model used. <sup>c</sup>SMD nitromethane solvent model used.

| Method               | <sup>a</sup> MAE $\Delta H$<br>(kcal·mol <sup>-1</sup> ) | <sup>a</sup> MAE $\Delta S$<br>(J·mol <sup>-1</sup> ·K <sup>-1</sup> ) | MAE $T_{SCO}$ (K) | StDev $T_{SCO}$ (K) | $T_{SCO}$ r <sup>2</sup> |
|----------------------|----------------------------------------------------------|------------------------------------------------------------------------|-------------------|---------------------|--------------------------|
| B3LYP                | 10.4                                                     | 37.7                                                                   | 581               | 50                  | 0.57                     |
| M06-L                | 3.3                                                      | 42.5                                                                   | 88                | 91                  | 0.75                     |
| PBE0-D4              | 10.8                                                     | 34.4                                                                   | 584               | 63                  | 0.59                     |
| PBE0                 | 15.4                                                     | 35.5                                                                   | 925               | 70                  | 0.46                     |
| TPSSh                | 3.5                                                      | 31.0                                                                   | 367               | 44                  | 0.62                     |
| r <sup>2</sup> SCAN  | 3.5                                                      | 35.6                                                                   | 415               | 52                  | 0.66                     |
| <sup>b</sup> PBE0-D4 | 31.1                                                     | 31.7                                                                   | 704               | 62                  | 0.29                     |
| <sup>c</sup> PBE0-D4 | 36.0                                                     | 41.3                                                                   | 680               | 47                  | 0.07                     |

Table S49: Metrics for  $T_{SCO}$  prediction using DFT methods

| Method              | Slope | Intercept (K) | $R^2$ |
|---------------------|-------|---------------|-------|
| B3LYP               | 1.12  | -611          | 0.57  |
| M06-L               | 2.07  | -312          | 0.71  |
| PBE0-D4             | 1.44  | -693          | 0.59  |
| PBE0                | 1.25  | -987          | 0.46  |
| TPSSh               | 1.08  | 347           | 0.62  |
| r <sup>2</sup> SCAN | 1.32  | 334           | 0.65  |

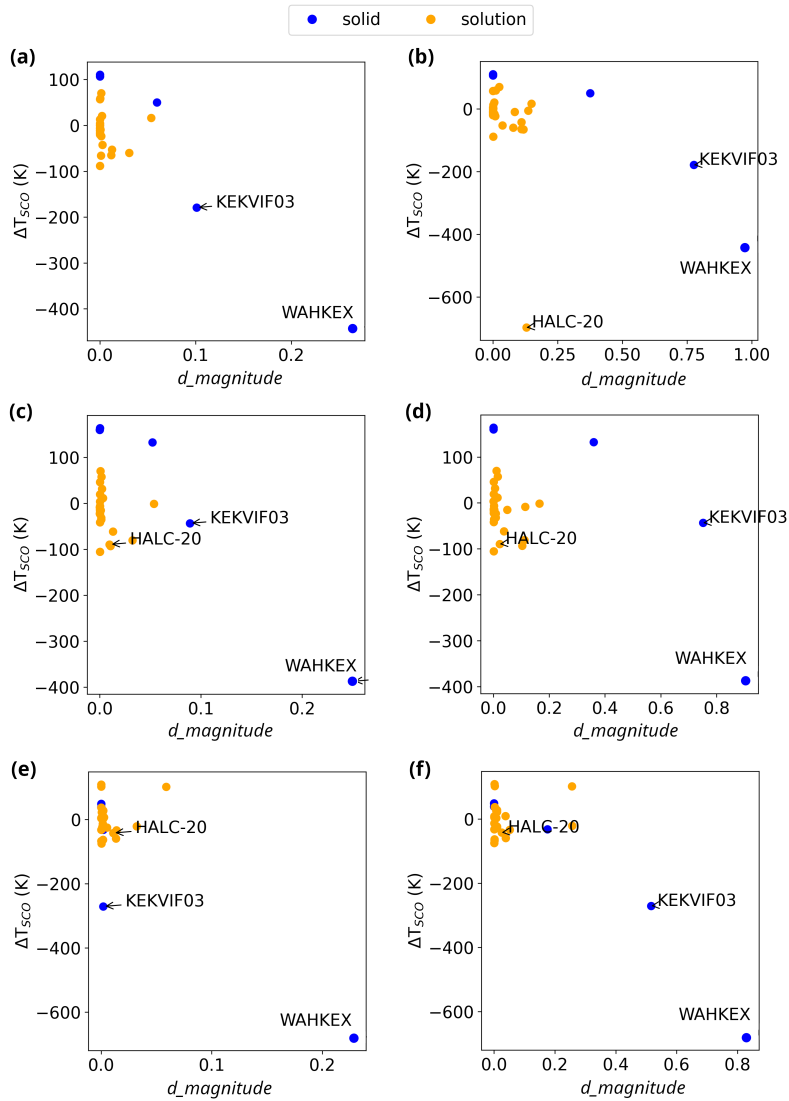

Figure S25: Plots of  $\Delta T_{SCO}$  vs  $d\_magnitude$  of optimised structures using (a) B3LYP/def2-TZVP and singlet; (b) B3LYP/def2-TZVP and quintet; (c) PBE0/def2-TZVP and singlet; (d) PBE0/def2-TZVP and quintet; (e) r<sup>2</sup>SCAN/def2-TZVP and singlet; and (f) r<sup>2</sup>SCAN/def2-TZVP and quintet. The outliers HALC-20, WAHKEX and KEKVIF03 are labelled for easy tracking

Table S50: Fe–N–C angles for the SCN– ligands in WAHKEK and KEFVIF03 complexes

| Complex/DFT functionals      | Singlet,<br>Angle 1 | Singlet, Angle 2 | Quintet,<br>Angle 1 | Quintet, Angle 2 |
|------------------------------|---------------------|------------------|---------------------|------------------|
| WAHKEK/B3LYP                 | 163.5               | 170.2            | 158.3               | 172.6            |
| WAHKEK/PBE0                  | 160.7               | 169.1            | 151.8               | 168.9            |
| WAHKEK/r <sup>2</sup> SCAN   | 156.4               | 167.0            | 148.7               | 163.4            |
| KEFVIF03/B3LYP               | 169.4               | 169.4            | 167.5               | 167.5            |
| KEFVIF03/PBE0                | 168.3               | 168.4            | 160.5               | 160.4            |
| KEFVIF03/r <sup>2</sup> SCAN | 147.9               | 147.9            | 147.9               | 147.9            |

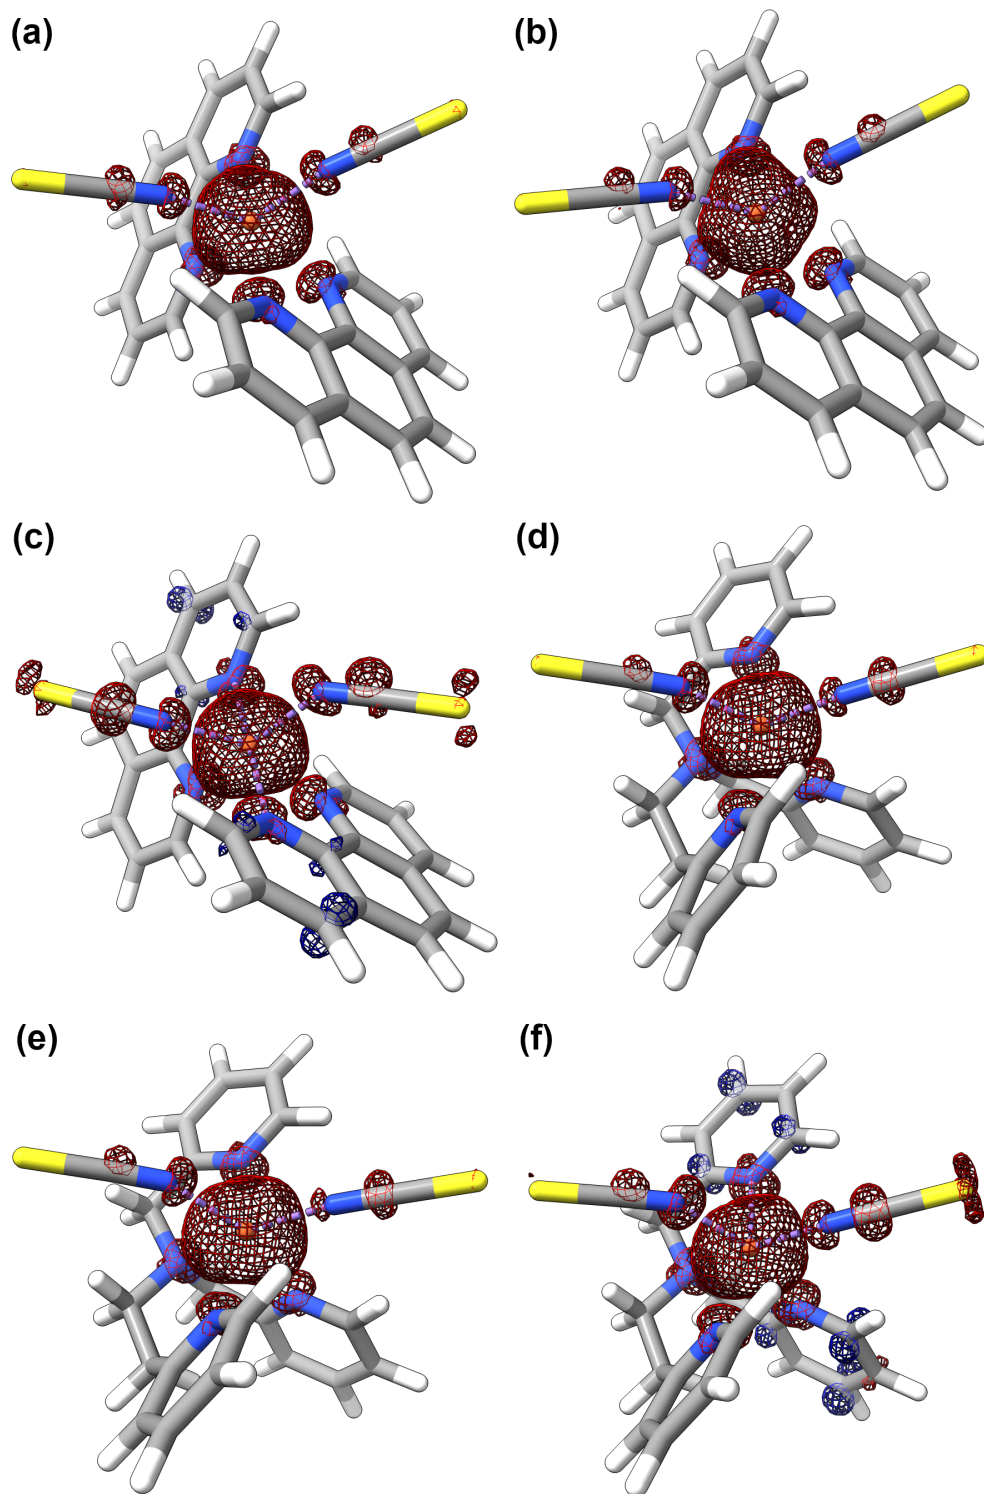

Figure S26: Optimised geometries and spin density analysis of WAHKEX and KEKVIF03 quintet complexes with (a) B3LYP/def2-TZVP for KEKVIF03, (b) PBE0/def2-TZVP for KEKVIF03, (c)  $r^2$ SCAN/def2-TZVP for KEKVIF03, (d) B3LYP/def2-TZVP for WAHKEX, (e) PBE0/def2-TZVP for WAHKEX, and (f)  $r^2$ SCAN/def2-TZVP for WAHKEX.

## 4 Prediction of $T_{\text{SCO}}$ with *Kestrel*

### 4.1 *Kestrel* Software

*Kestrel* consists of a GUI and python package, *KestrelPy*, both of which calculate paramagnetic susceptibilities and electronic states, electron paramagnetic resonance (EPR) parameters and absorption spectra. Calculations consider only the angular coordination of the atoms directly ligating the metal centre, with the bonding of each ligand parameterised using  $e$  values. These are chemically meaningful and describe the strength and type of ligand bond (i.e.  $e_{\sigma}$  represents a  $\sigma$  bond).

Each  $e$  value contributes to the  $5 \times 5$  ligand field matrix which describes the ligand field surrounding a metal centre. Its diagonalisation gives the d orbital splitting. Addition of spin-orbit coupling (SOC) and interelectronic repulsion parameters (Racah B and C) to the ligand field matrix give an effective Hamiltonian which provides the energy of each electronic state along with its configuration interaction. Using an effective Hamiltonian alongside ligand field parameters affords real-time calculation of electronic and magnetic properties.

|               | $d_{xy}$ | $d_{yz}$ | $d_{z^2}$ | $d_{xz}$ | $d_{x^2-y^2}$ |
|---------------|----------|----------|-----------|----------|---------------|
| $d_{xy}$      | 0        | 0        | 0         | 0        | 0             |
| $d_{yz}$      | 0        | 0        | 0         | 0        | 0             |
| $d_{z^2}$     | 0        | 0        | 7400      | 0        | 0             |
| $d_{xz}$      | 0        | 0        | 0         | 0        | 0             |
| $d_{x^2-y^2}$ | 0        | 0        | 0         | 0        | 22200         |

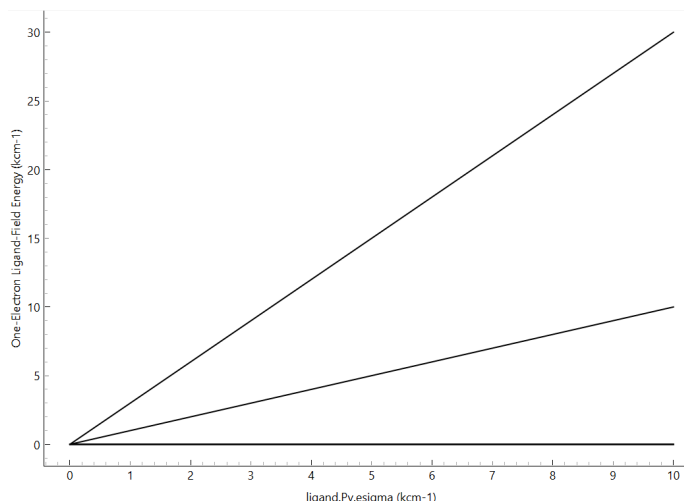

Left:  $5 \times 5$  ligand field matrix for a square planar ( $D_{4h}$ )  $\text{Cu}^{2+}$  complex.

Right: Variation of d orbital energies with increasing  $e_{\sigma}$  parameter value

### 4.1.1 Calculating $T_{SCO}$ with *Kestrel*

For the following analysis, optimised DFT structures (PBE0 and PBE0-D4) were imported from .xyz files. The metal centre ( $\text{Fe}^{II}$ ) was assigned and the coordinating atoms of each ligand were defined, with an extra atom used to orient the ligand x/y directions (Fig. S27). Common  $e$  values were then assigned to each pyridine and pyrazolyl ligand and Racah B/C and spin-orbit coupling parameters were used to describe the  $\text{Fe}^{II}$  metal centre.

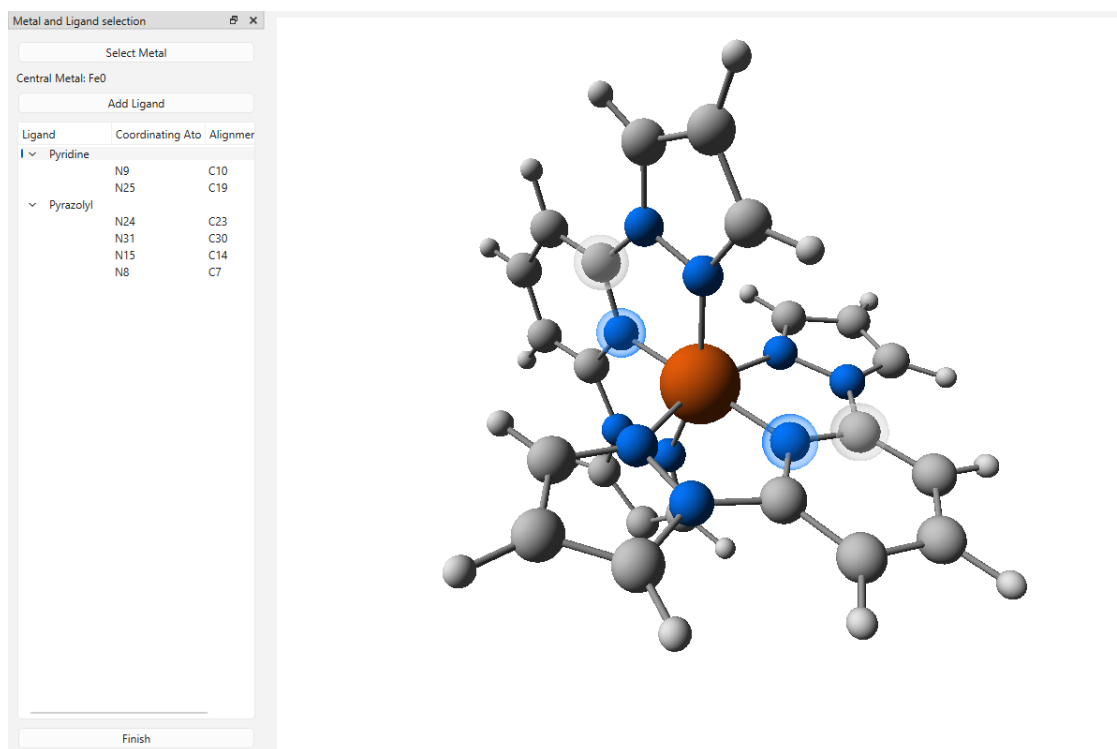

Figure S27: Assignment of the metal centre and ligating atoms after importing a .xyz file in *Kestrel*'s GUI. The pyridine coordinating nitrogen's have been highlighted and the assigned ligand atoms can be seen in the left panel.

From the  $e$  parameters, *Kestrel* constructs the  $5 \times 5$  ligand field matrix to which spin-orbit coupling and inter-electronic repulsion are added to form an effective Hamiltonian. This describes the energy of each Russell-Saunders state and permits the calculation of magnetic properties such as the paramagnetic susceptibility. Full details of this process are given in the workflow on the page 72.

Paramagnetic susceptibilities were then calculated at 5 K intervals, averaged over each orientation and plotted against the temperature (Fig. S29). The midpoint of each plot, where the LS and HS states are equally occupied (at approx.  $1.5 \text{ cm}^3 \text{ K mol}^{-1}$ ), gave  $T_{SCO}$  for a single complex. Comparison with other complexes in *T\_SCO\_dataset* showed this be sensitive to both  $e$  value (Fig. S40) and ligand bite angle (Fig. S35).

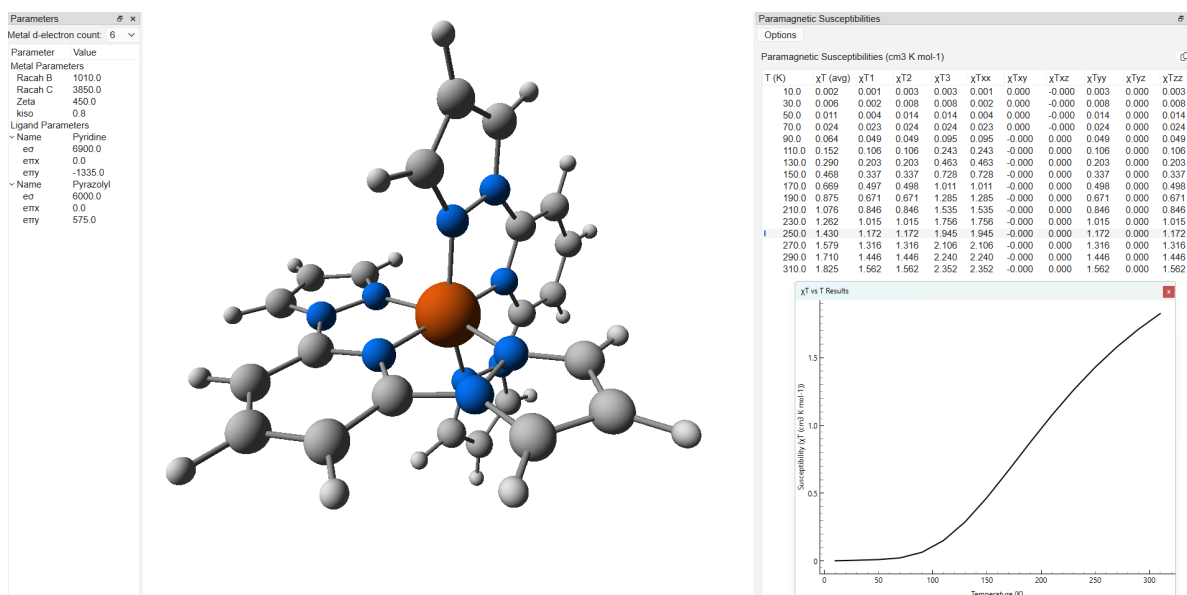

Figure S28: Molecular structure of HALC-1 along with input parameters (left panel) and the calculated paramagnetic susceptibility curve (right panel) in *Kestrel's* GUI. The plot will update in real-time as parameter inputs are changed.

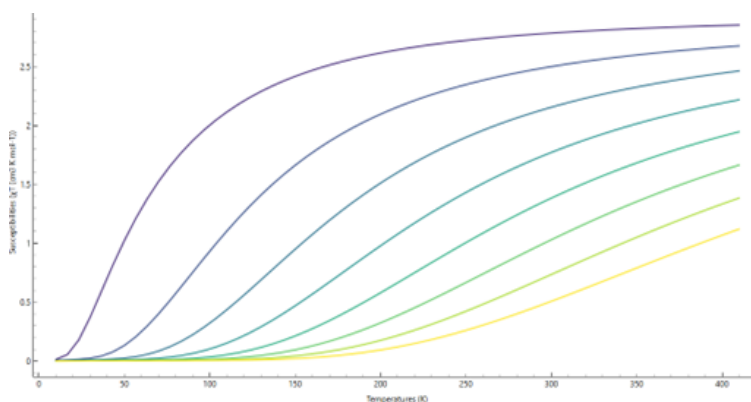

Figure S29: Variation of calculated paramagnetic susceptibility curves with pyridine  $e_\sigma$  value.  $e_\sigma$  was varied (step =  $50 \text{ cm}^{-1}$ ) between  $6750 \text{ cm}^{-1}$  (dark purple, lowest  $T_{SCO}$ ) and  $7100 \text{ cm}^{-1}$  (yellow, highest  $T_{SCO}$ ) for HALC-1.

The computational workflow below details how  $T_{SCO}$  for a single complex is calculated in *Kestrel* from a set of parameter values. For the user, this calculation runs in real-time requiring no further input beyond the entry of parameter values.

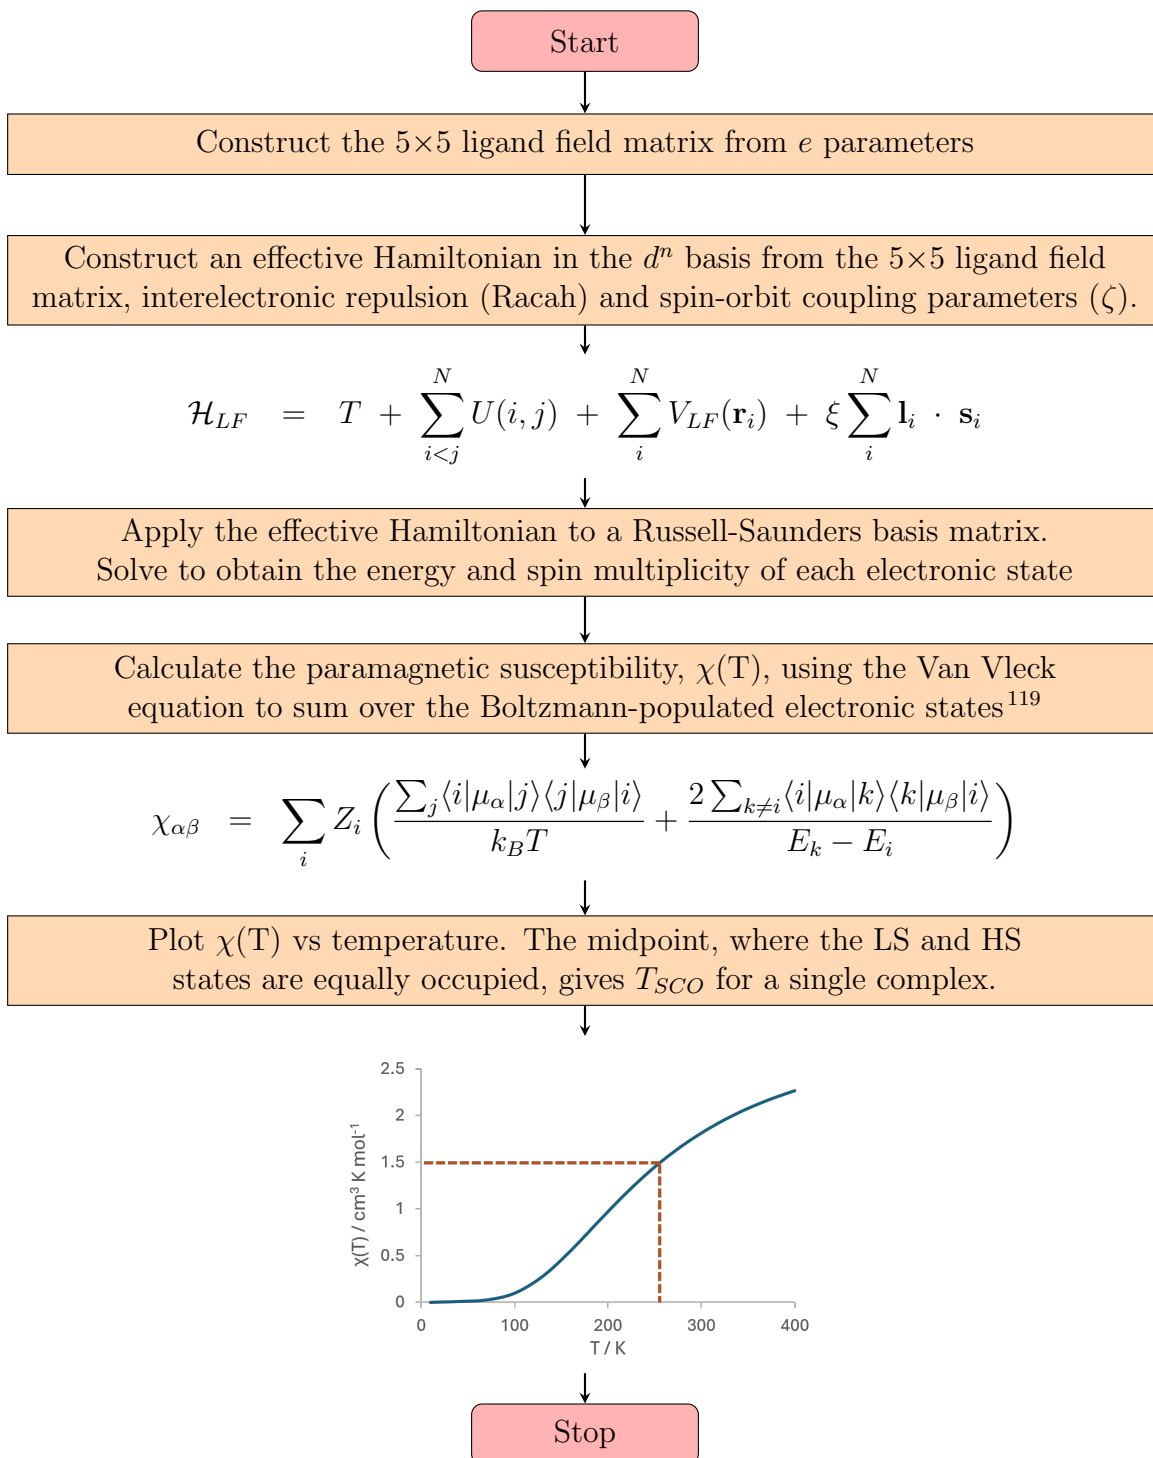

## 4.2 Calculated $T_{SCO}$ using fixed ligand field parameters

Initially, the effect of geometric differences between each HALC-X complex in *T-SCO\_dataset* were analysed using the same parameter values for each complex. This allowed the sensitivity of  $T_{SCO}$  to variations in geometry to be explored.

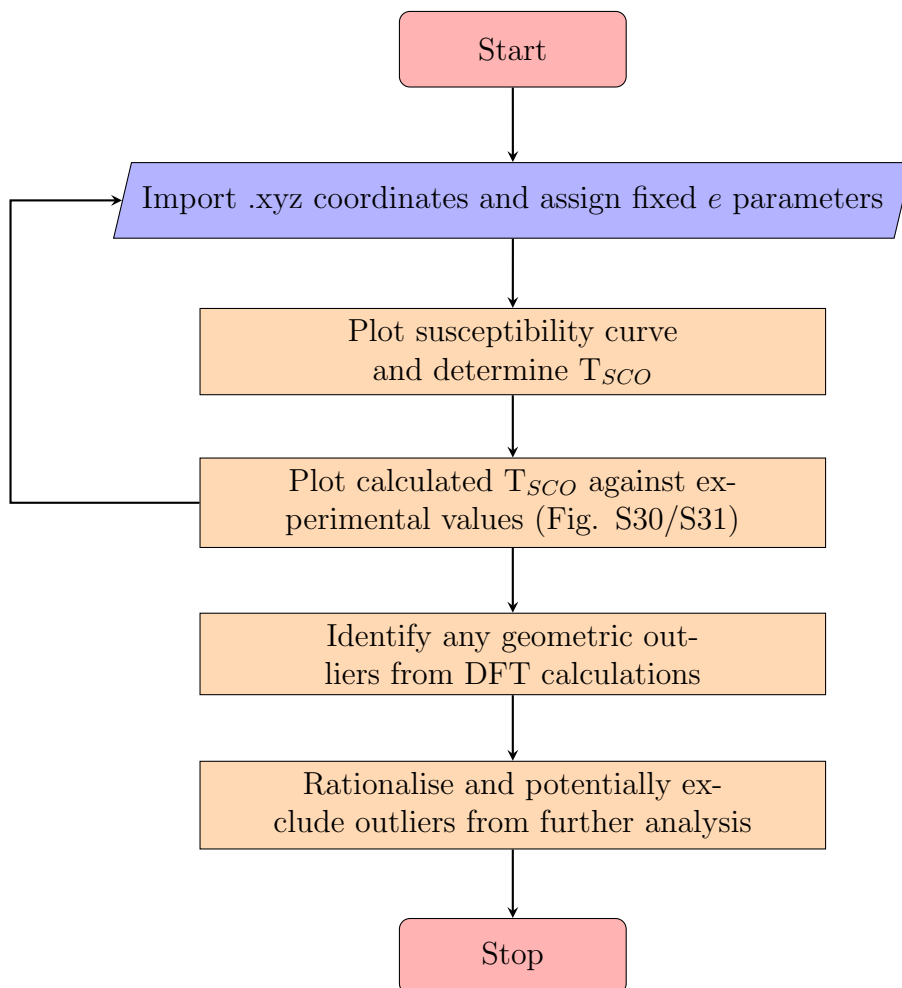

Table S51: Tabulation of Experimental  $T_{SCO}$  from NMR studies by M. Halcrow,<sup>116</sup> *Kestrel*-calculated  $T_{SCO}$  and the energy gap between the singlet ground state and quintet state to which SCO occurs. DFT optimised geometries (PBE0/def2-TZVP or PBE0-D4/def2-TZVP) were used for each complex. Parameter values were fixed at:  $p_y(e_\sigma) = 6900 \text{ cm}^{-1}$ ;  $p_y(e_\pi) = -1335 \text{ cm}^{-1}$ ;  $p_z(e_\sigma) = 6000 \text{ cm}^{-1}$ ;  $p_z(e_\pi) = 575 \text{ cm}^{-1}$ ; Racah B =  $1010 \text{ cm}^{-1}$ , Racah C =  $3850 \text{ cm}^{-1}$ , SOC =  $450 \text{ cm}^{-1}$ .

| Complex | Experimental $T_{SCO}$ (K) | <i>Kestrel</i> $T_{SCO}$ (PBE0) (K) | LS-HS Energy (PBE0) ( $\text{cm}^{-1}$ ) | <i>Kestrel</i> $T_{SCO}$ (PBE0-D4) (K) | LS-HS Energy (PBE0-D4) ( $\text{cm}^{-1}$ ) |
|---------|----------------------------|-------------------------------------|------------------------------------------|----------------------------------------|---------------------------------------------|
| HALC-1  | 248                        | 248                                 | 333                                      | 348                                    | 500                                         |
| HALC-2  | 216                        | 187                                 | 235                                      | 292                                    | 404                                         |
| HALC-3  | 213                        | 196                                 | 241                                      | 302                                    | 402                                         |
| HALC-4  | 281                        | 255                                 | 343                                      | 358                                    | 515                                         |
| HALC-5* | <145                       | 104                                 | 112                                      | 215                                    | 281                                         |
| HALC-6* | <190                       | 75                                  | 74                                       | 195                                    | 249                                         |
| HALC-7  | 309                        | 257                                 | 346                                      | 362                                    | 523                                         |
| HALC-8  | 215                        | 144                                 | 169                                      | 256                                    | 346                                         |
| HALC-9  | 164                        | 150                                 | 178                                      | 260                                    | 352                                         |
| HALC-10 | 158                        | 145                                 | 171                                      | 254                                    | 344                                         |
| HALC-11 | 215                        | 203                                 | 260                                      | 306                                    | 429                                         |
| HALC-12 | 226                        | 197                                 | 251                                      | 305                                    | 427                                         |
| HALC-13 | 234                        | 201                                 | 257                                      | 308                                    | 433                                         |
| HALC-14 | 236                        | 202                                 | 258                                      | 310                                    | 436                                         |
| HALC-15 | 246                        | 159                                 | 191                                      | 270                                    | 368                                         |
| HALC-16 | 194                        | 153                                 | 183                                      | 261                                    | 354                                         |
| HALC-17 | 284                        | 232                                 | 306                                      | 351                                    | 504                                         |
| HALC-18 | 294                        | 248                                 | 328                                      | 353                                    | 498                                         |
| HALC-19 | 245                        | 154                                 | 184                                      | 289                                    | 396                                         |
| HALC-20 | 259                        | 160                                 | 192                                      | 298                                    | 411                                         |
| HALC-21 | 261                        | 162                                 | 195                                      | 295                                    | 407                                         |
| HALC-22 | 273                        | 241                                 | 321                                      | 340                                    | 485                                         |
| HALC-23 | 259                        | 243                                 | 323                                      | 344                                    | 492                                         |
| HALC-24 | 251                        | 248                                 | 332                                      | 354                                    | 510                                         |
| HALC-25 | 246                        | 282                                 | 388                                      | 379                                    | 553                                         |
| HALC-26 | 231                        | 214                                 | 277                                      | 320                                    | 451                                         |
| HALC-27 | 238                        | 219                                 | 286                                      | 325                                    | 461                                         |
| HALC-28 | 237                        | 229                                 | 302                                      | 333                                    | 474                                         |

\*For HALC-5 and HALC-6, Experimental  $T_{SCO}$  values were unavailable due to the complexes remaining high spin over the liquid range of the solvent.

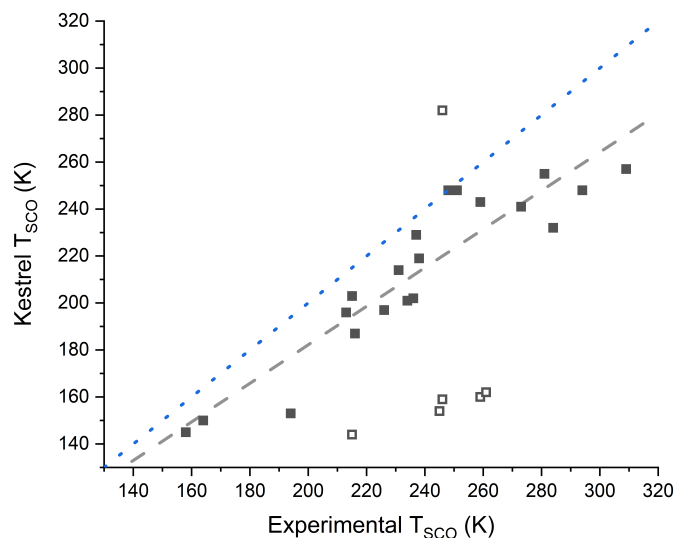

Figure S30: Experimental  $T_{SCO}$  against *Kestrel*-calculated  $T_{SCO}$  for HALCROW complexes ( $n = 26$ ,  $R^2 = 0.42$ ) using PBE0/def2-TZVP,  $e$  parameters were fixed at  $p_y(e_\sigma) = 6900 \text{ cm}^{-1}$ ;  $p_y(e_\pi) = -1335 \text{ cm}^{-1}$ ;  $p_z(e_\sigma) = 6000 \text{ cm}^{-1}$ ;  $p_z(e_\pi) = 575 \text{ cm}^{-1}$ ; Racah B =  $1010 \text{ cm}^{-1}$ , Racah C =  $3850 \text{ cm}^{-1}$ , SOC =  $450 \text{ cm}^{-1}$ . Outliers are represented with white squares. Dotted line (blue) shows the experimental trend ( $y = x$ ).

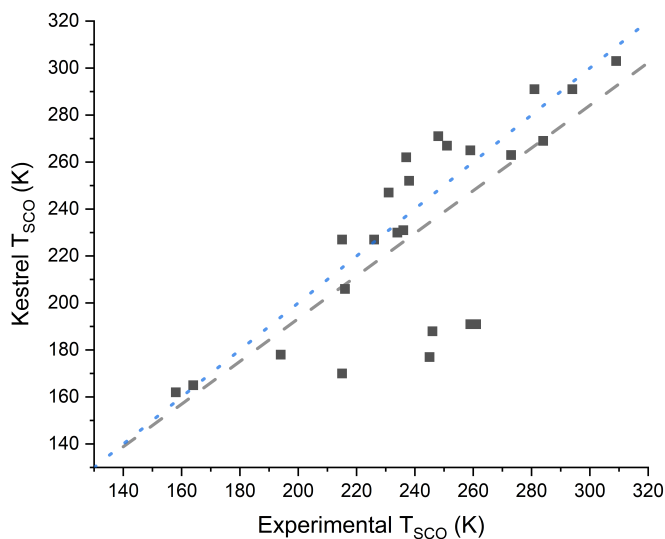

Figure S31: Experimental  $T_{SCO}$  against *Kestrel*-calculated  $T_{SCO}$  for HALCROW complexes ( $n = 26$ ,  $R^2 = 0.57$ ) using PBE0-D4/def2-TZVP.  $e$  parameters were fixed at  $p_y(e_\sigma) = 6900 \text{ cm}^{-1}$ ;  $p_y(e_\pi) = -1335 \text{ cm}^{-1}$ ;  $p_z(e_\sigma) = 6000 \text{ cm}^{-1}$ ;  $p_z(e_\pi) = 575 \text{ cm}^{-1}$ ; Racah B =  $1010 \text{ cm}^{-1}$ , Racah C =  $3850 \text{ cm}^{-1}$ , SOC =  $450 \text{ cm}^{-1}$ . Dotted line (blue) shows the experimental trend ( $y = x$ ).

### 4.3 Geometric dependence of calculated $T_{SCO}$

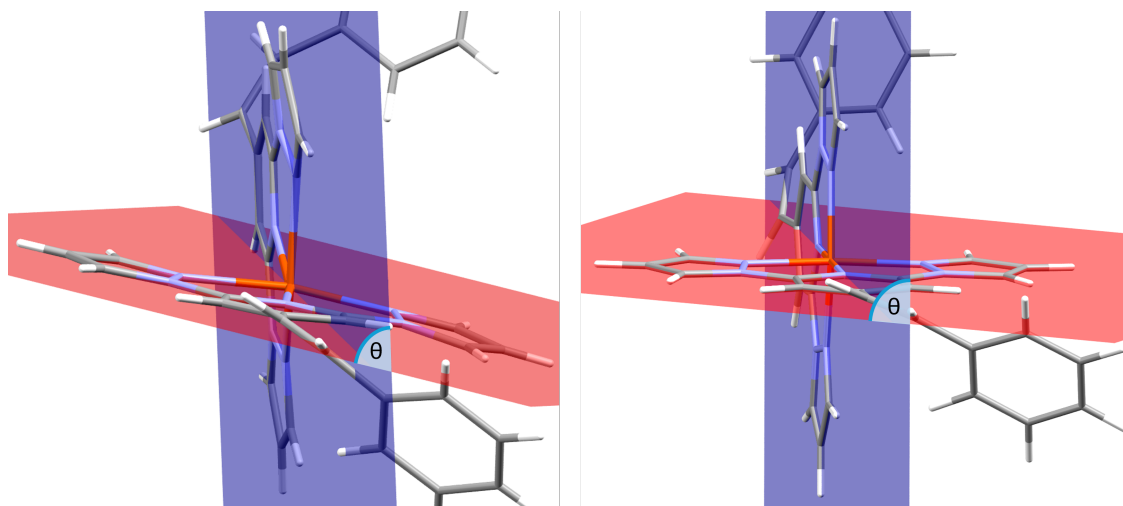

Figure S32: Crystal structure (left) and DFT-calculated structure (PBE0/def2-TZVP) (right) for HALC-19. The interplanar angle between the least-squares planes of the two tridentate ligands is shown. For DFT,  $\theta = 90.0^\circ$  and for the crystal structure,  $\theta = 80.2^\circ$

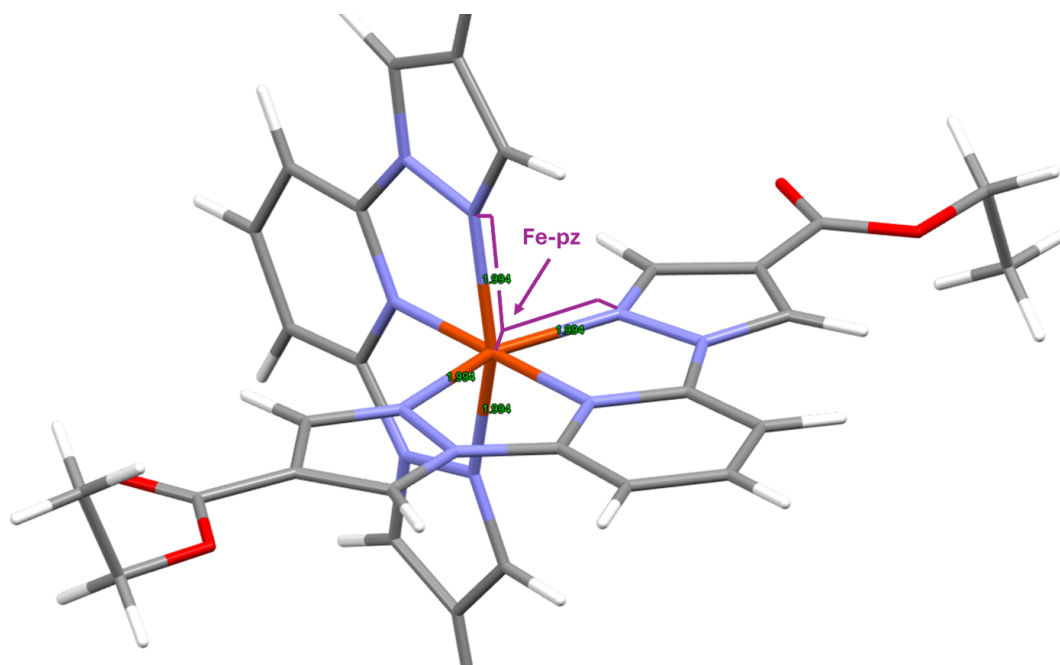

Figure S33: DFT optimized structure of HALC-25 (PBE0/def2-TZVP) showing the reduced Fe-N( $p_z$ ) bond length.

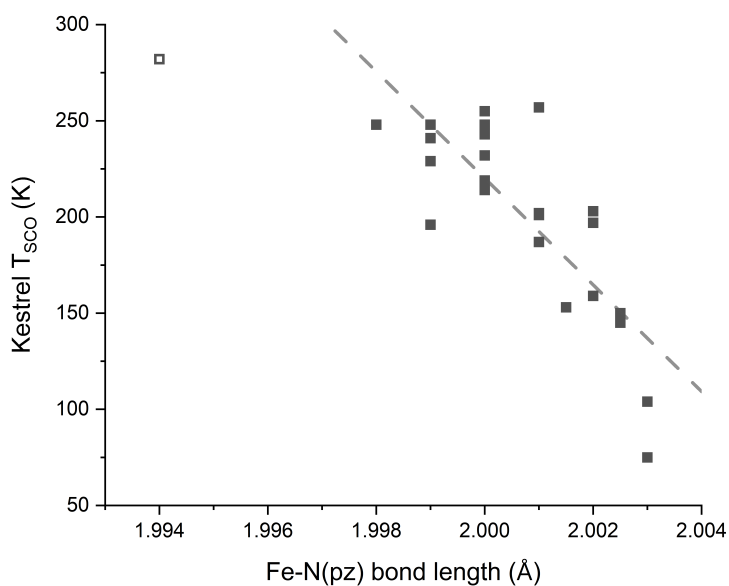

Figure S34: Correlation between Fe-N( $p_z$ ) bond length (PBE0/def2-TZVP) and *Kestrel*-calculated  $T_{SCO}$  ( $n = 23$ ,  $R^2 = 0.64$ ). HALC-25 is represented by a white square and is omitted from the correlation.

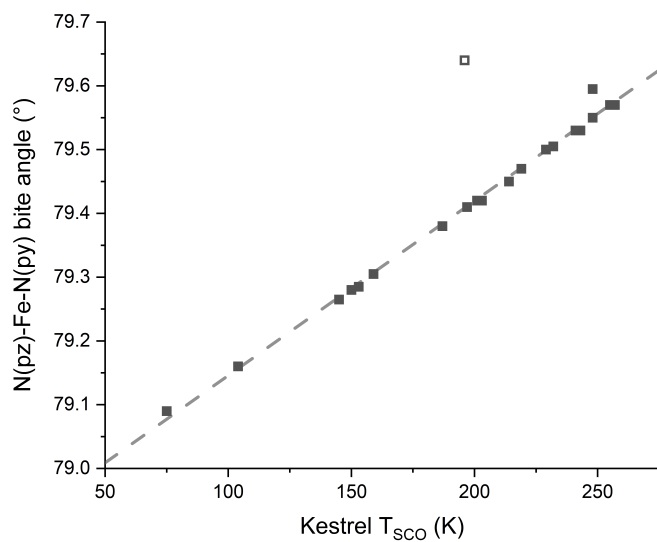

Figure S35: Variation of *Kestrel*-calculated  $T_{SCO}$  with the smallest N( $p_z$ )-Fe-N( $p_y$ ) angle for each complex (PBE0/def2-TZVP). HALC-3 is represented by a white square. ( $n = 22$ ,  $R^2 > 0.99$  in the absence of HALC-3).

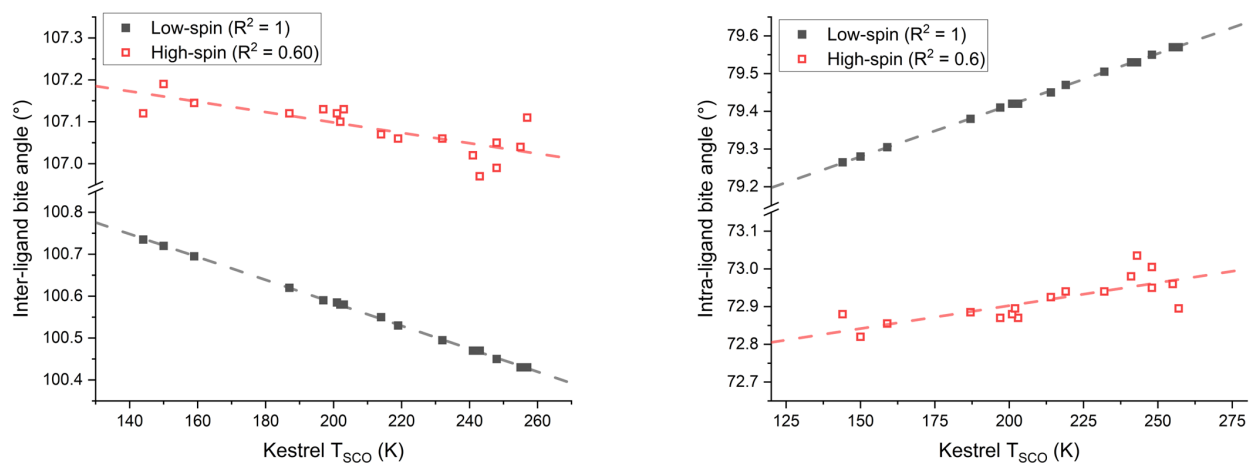

Figure S36: Variation of inter-ligand bite angle (left) and intra-ligand bite angle (right) with calculated  $T_{SCO}$  for low-spin (black, squares) and high-spin (red, empty squares) geometries. All geometries were optimised with PBE0/def2-TZVP.

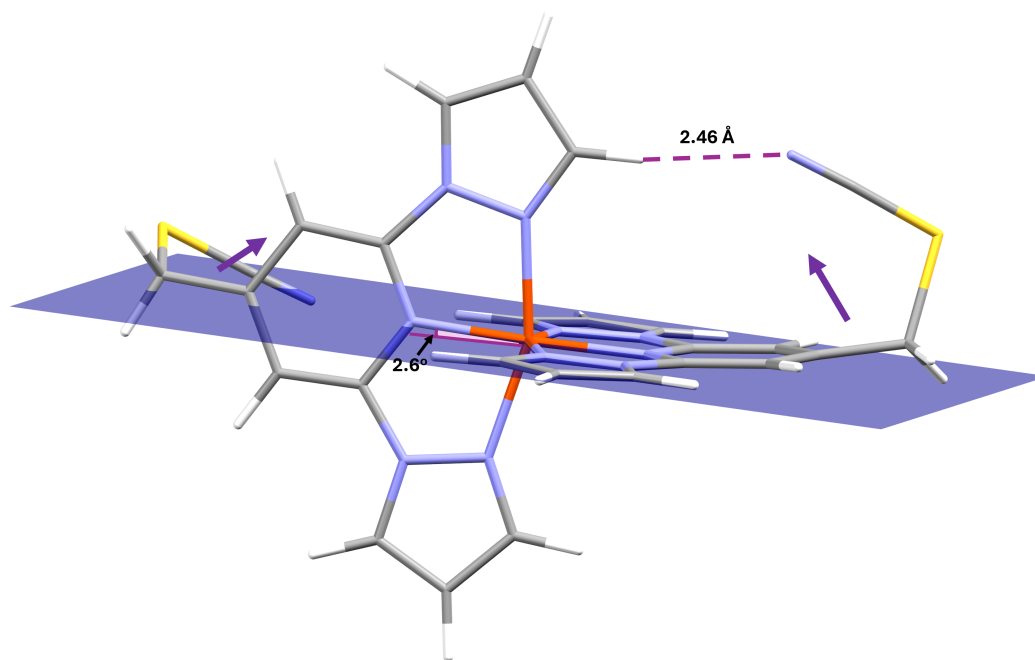

Figure S37: DFT optimised structure of HALC-3 (PBE0/def2-TZVP) showing the distortion causing the substituent to "fold back" towards the complex. The angle between the Fe-N( $p_y$ ) vector and the N( $p_z$ )-Fe-N( $p_z$ ) plane (2.6°, blue) is also shown.

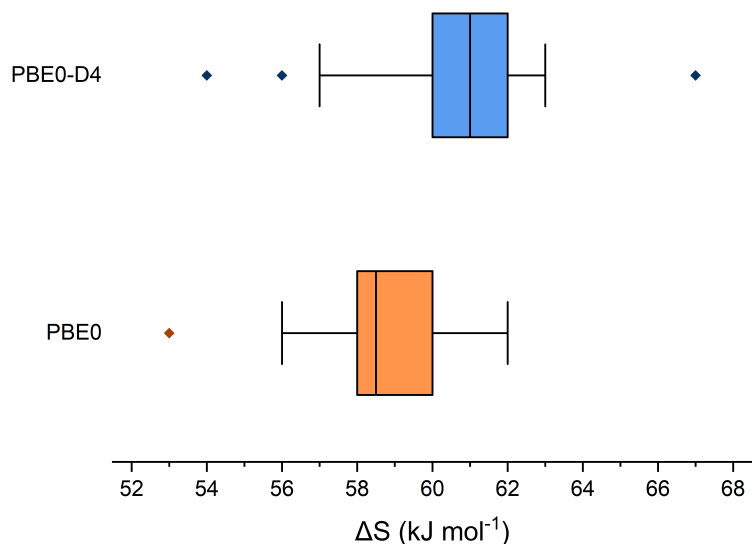

Figure S38: Box plot showing the variation in DFT-calculated entropy changes for PBE0 and PBE0-D4 structures. The data in this plot is taken from tables S42 and S43

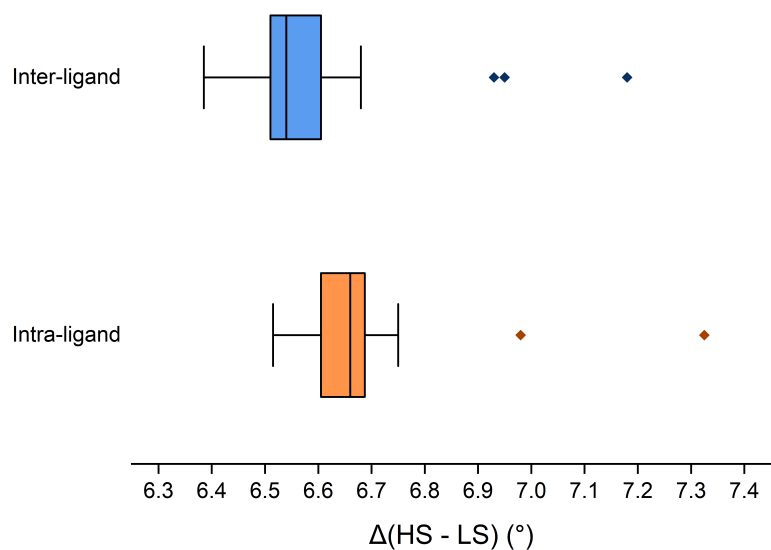

Figure S39: Box plot showing the variation in the difference between high-spin and low-spin bite angles for PBE0/def2-TZVP structures. The top box plot shows the difference for the inter-ligand bite angles and the bottom box plot the difference in intra-ligand bite angles.

#### 4.4 Dependence of calculated $T_{SCO}$ on $e_\sigma$ parameter values

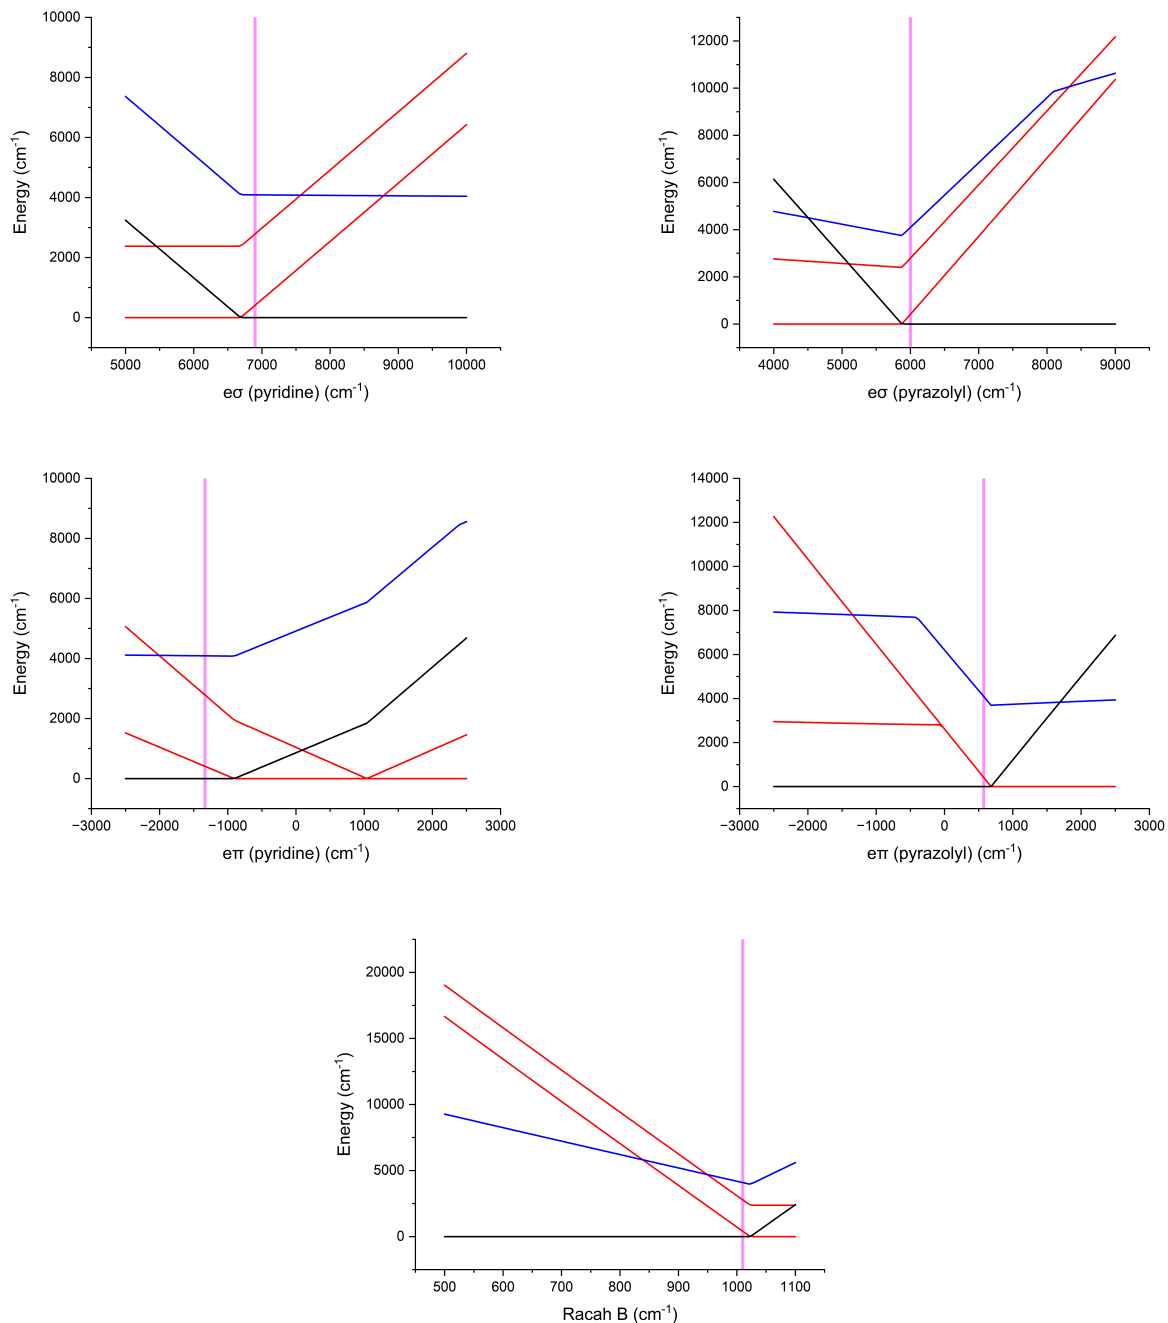

Figure S40: Tanabe-Sugano style variation diagram of the singlet (black), triplet (blue) and quintet (red) spin-state energies with variation of  $e$  and interelectronic repulsion parameters for HALC-1. From top left to bottom right, variation of  $p_y$  ( $e_\sigma$ ),  $p_z$  ( $e_\sigma$ ),  $p_y$  ( $e_\pi$ ),  $p_z$  ( $e_\pi$ ) and Racah B values. Parameter values used in calculations are highlighted by the pink lines.

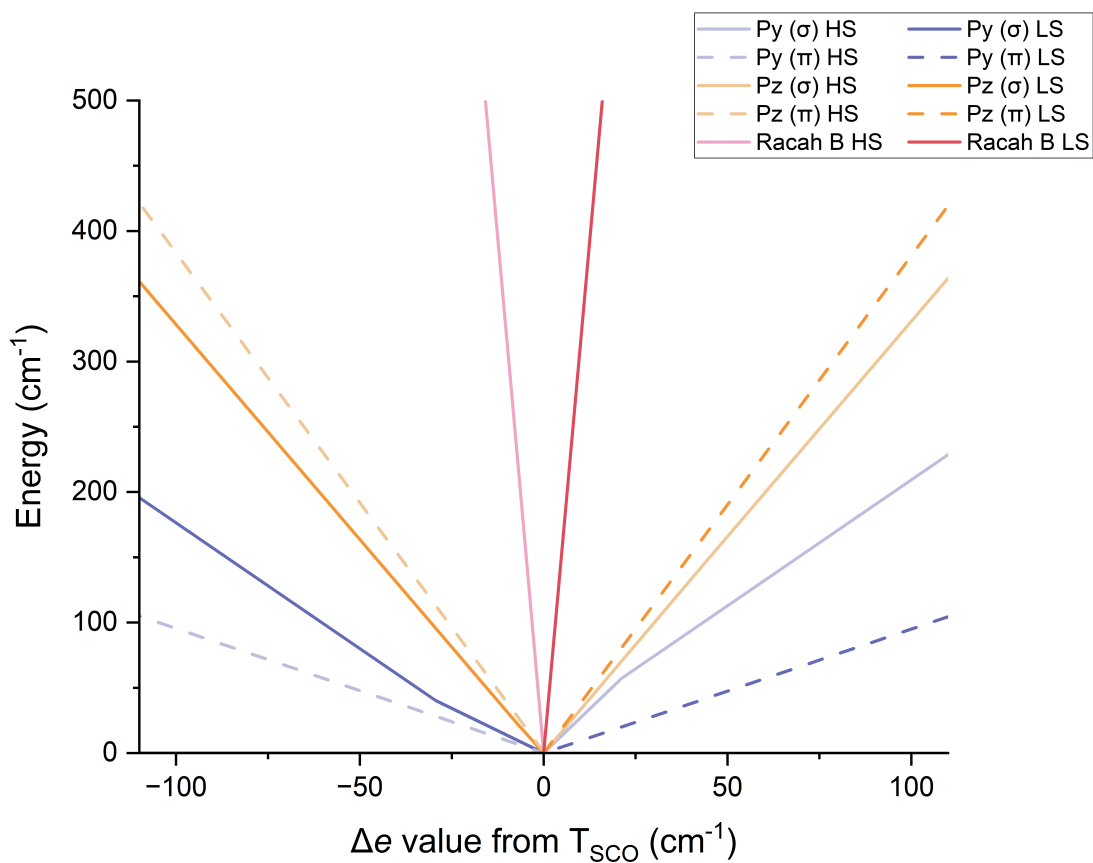

Figure S41: Superposition of Tanabe-Sugano style variation diagrams for each parameter value. Relative energies of the quintet state (light line) and singlet state (dark line) are given for variation of each parameter value above and below the parameter value at which SCO occurs.

#### 4.4.1 Relationship between $e_\sigma$ and Hammett ( $\sigma$ ) values

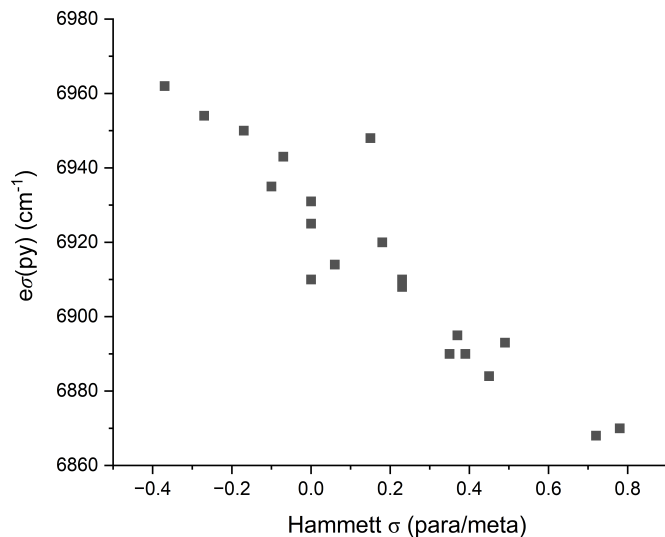

Figure S42: Variation of  $p_y$  ( $e_\sigma$ ) with Hammett  $\sigma_p$  for -X substituents and Hammett  $\sigma_m$  for -Y substituents. A correlation of  $(e_\sigma) = 6930 - 85.H$  was determined ( $n = 20$ ,  $R^2 = 0.87$ ).

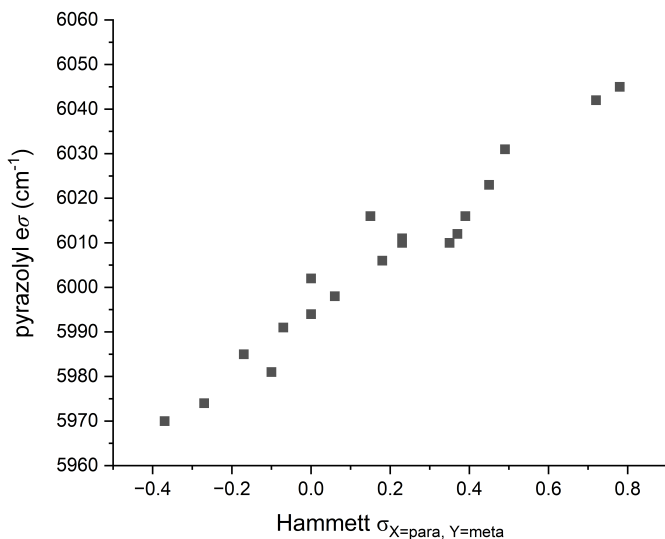

Figure S43: Variation of  $p_z$  ( $e_\sigma$ ) with Hammett  $\sigma_p$  for -X substituents and Hammett  $\sigma_m$  for -Y substituents. A correlation of  $(e_\sigma) = 5995 + 65.H$  was determined ( $n = 20$ ,  $R^2 = 0.95$ ).

#### 4.4.2 Calculated $T_{SCO}$ with $e$ parameters determined by Hammett ( $\sigma$ ) values - PBE0/def2-TZVP optimised geometries

The variation diagrams in figure S40 show  $T_{SCO}$  to depend on the  $e$  values. We expect the precise nature of metal-ligand bonding to be dependent on the substituent attached to the pyridine (-X substituted) or pyrazolyl (-Y substituted) ring. The workflow below allows these differences to be quantified with reported Hammett parameters.<sup>116</sup>

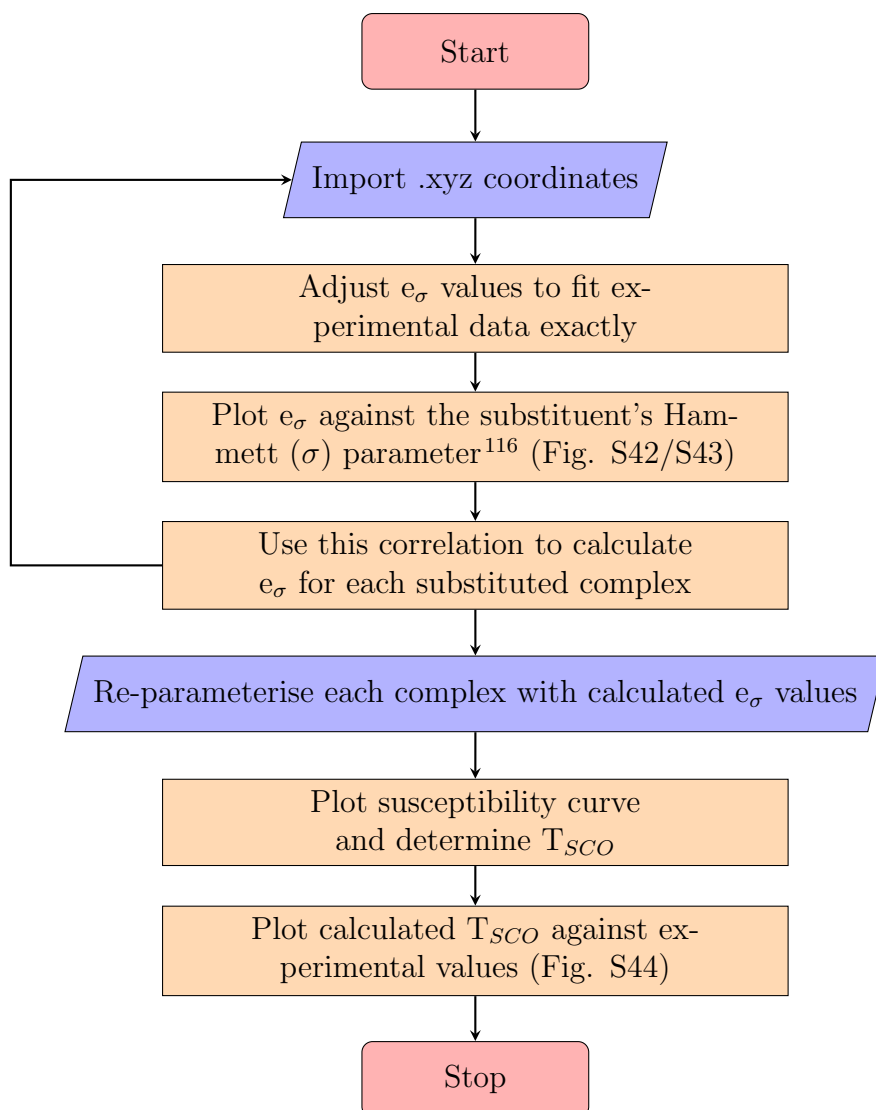

This approach can be extended to predict  $e$  values for novel substituents attached to this ligand scaffold, provided a Hammett parameter value is available.

Table S52: Tabulation of Experimental  $T_{SCO}$  from NMR studies by M. Halcrow,<sup>116</sup> *Kestrel*-calculated  $T_{SCO}$  and the energy gap between the singlet ground state and quintet state to which SCO occurs. DFT optimised geometries (PBE0/def2-TZVP) were used for each complex. Parameter values were varied for pyridine and pyrazole  $e_\sigma$  according to the Hammett  $\sigma_{para}$  parameter for each X substituent and Hammett  $\sigma_{meta}$  parameter for each Y substituent using the following correlations:  $p_y(e_\sigma) = 6929 - 94.H$  and  $p_z(e_\sigma) = 5995 + 70.H$ .

Other parameter values were fixed at:  $p_y(e_\pi) = -1335 \text{ cm}^{-1}$ ,  $p_z(e_\pi) = 575 \text{ cm}^{-1}$ , Racah B =  $1010 \text{ cm}^{-1}$ , Racah C =  $3850 \text{ cm}^{-1}$ , SOC =  $450 \text{ cm}^{-1}$ .

| Complex | Hammett $\sigma$ parameter* | pyridine $e_\sigma$ ( $\text{cm}^{-1}$ ) | pyrazolyl $e_\sigma$ ( $\text{cm}^{-1}$ ) | Experimental $T_{SCO}$ (K) | <i>Kestrel</i> $T_{SCO}$ (K) | LS-HS Energy gap ( $\text{cm}^{-1}$ ) |
|---------|-----------------------------|------------------------------------------|-------------------------------------------|----------------------------|------------------------------|---------------------------------------|
| HALC-1  | 0                           | 6929                                     | 5995                                      | 248                        | 271                          | 372                                   |
| HALC-2  | -0.17                       | 6945                                     | 5983                                      | 216                        | 206                          | 265                                   |
| HALC-4  | 0.45                        | 6887                                     | 6027                                      | 281                        | 291                          | 404                                   |
| HALC-5* | -0.66                       | 6991                                     | 5949                                      | <145                       | 112                          | 124                                   |
| HALC-6* | -0.83                       | 7007                                     | 5937                                      | <190                       | 79                           | 79                                    |
| HALC-7  | 0.78                        | 6856                                     | 6050                                      | 309                        | 303                          | 422                                   |
| HALC-8  | 0.05                        | 6924                                     | 5999                                      | 215                        | 170                          | 210                                   |
| HALC-9  | -0.37                       | 6964                                     | 5969                                      | 164                        | 165                          | 201                                   |
| HALC-10 | -0.27                       | 6954                                     | 5976                                      | 158                        | 162                          | 196                                   |
| HALC-11 | 0.06                        | 6923                                     | 5999                                      | 215                        | 227                          | 299                                   |
| HALC-12 | 0.23                        | 6907                                     | 6011                                      | 226                        | 227                          | 298                                   |
| HALC-13 | 0.23                        | 6907                                     | 6011                                      | 234                        | 230                          | 304                                   |
| HALC-14 | 0.18                        | 6912                                     | 6008                                      | 236                        | 231                          | 305                                   |
| HALC-15 | 0.15                        | 6915                                     | 6006                                      | 246                        | 188                          | 237                                   |
| HALC-16 | 0                           | 6929                                     | 5995                                      | 194                        | 178                          | 221                                   |
| HALC-17 | 0.49                        | 6883                                     | 6029                                      | 284                        | 269                          | 366                                   |
| HALC-18 | 0.72                        | 6861                                     | 6045                                      | 294                        | 291                          | 397                                   |
| HALC-19 | -0.07                       | 6936                                     | 5990                                      | 245                        | 177                          | 219                                   |
| HALC-20 | 0.17                        | 6913                                     | 6007                                      | 259                        | 191                          | 241                                   |
| HALC-21 | 0.26                        | 6905                                     | 6013                                      | 261                        | 191                          | 241                                   |
| HALC-22 | -0.07                       | 6936                                     | 5990                                      | 273                        | 263                          | 356                                   |
| HALC-23 | 0                           | 6929                                     | 5995                                      | 259                        | 265                          | 362                                   |
| HALC-24 | -0.1                        | 6938                                     | 5988                                      | 251                        | 267                          | 366                                   |
| HALC-26 | 0.37                        | 6894                                     | 6021                                      | 231                        | 247                          | 331                                   |
| HALC-27 | 0.39                        | 6892                                     | 6022                                      | 238                        | 252                          | 340                                   |
| HALC-28 | 0.35                        | 6896                                     | 6020                                      | 237                        | 262                          | 357                                   |

\*For HALC-5 and HALC-6, Experimental  $T_{SCO}$  values were unavailable due to them remaining high spin over the liquid range of the solvent.

\*Hammett  $\sigma_p$  and Hammett  $\sigma_m$  values were taken from a previous study by Kershaw Cook et al.<sup>116</sup>

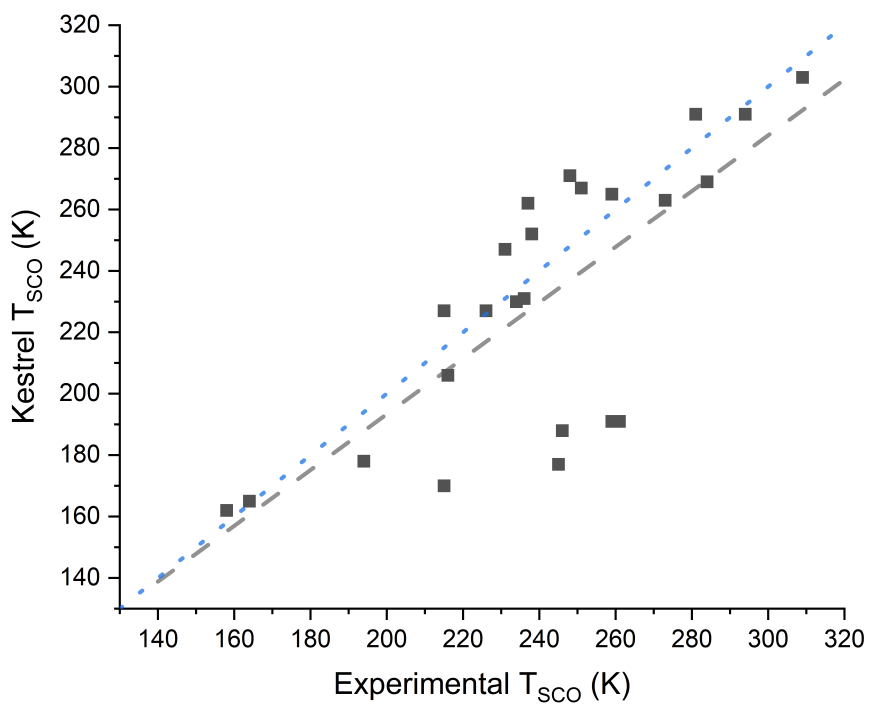

Figure S44: Experimental  $T_{SCO}$  against *Kestrel*-calculated  $T_{SCO}$  for HALCROW complexes optimised with PBE0/def2-TZVP and with HALC-8 and HALC-19-21 included ( $n = 24$ ,  $R^2 = 0.56$ ). Racah, SOC parameters and  $e$  parameters were taken from table S47. The dotted line (blue) shows the experimental trend ( $y = x$ ).



#### 4.4.3 Calculated $T_{SCO}$ with $e$ parameters determined by Hammett ( $\sigma$ ) values - PBE0-D4/def2-TZVP optimised geometries

Table S53: Tabulation of Experimental  $T_{SCO}$  from NMR studies by M. Halcrow,<sup>116</sup> *Kestrel*-calculated  $T_{SCO}$  and the energy gap between the singlet ground state and quintet state to which SCO occurs. DFT optimised geometries (PBE0-D4/def2-TZVP) were used for each complex. Parameter values were varied for pyridine and pyrazole  $e_\sigma$  according to the Hammett  $\sigma_{para}$  parameter for each X substituent and Hammett  $\sigma_{meta}$  parameter for each Y substituent using the following correlations:  $p_y(e_\sigma) = 6860 - 94.H$  and  $p_z(e_\sigma) = 5980 + 70.H$ .

Other parameter values were fixed at:  $p_y(e_\pi) = -1335 \text{ cm}^{-1}$ ,  $p_z(e_\pi) = 575 \text{ cm}^{-1}$ , Racah B =  $1010 \text{ cm}^{-1}$ , Racah C =  $3850 \text{ cm}^{-1}$ , SOC =  $450 \text{ cm}^{-1}$ .

| Complex | Hammett $\sigma$ parameter* | pyridine $e_\sigma$ ( $\text{cm}^{-1}$ ) | pyrazolyl $e_\sigma$ ( $\text{cm}^{-1}$ ) | Experimental $T_{SCO}$ (K) | Calculated $T_{SCO}$ (K) | LS-HS Energy gap ( $\text{cm}^{-1}$ ) |
|---------|-----------------------------|------------------------------------------|-------------------------------------------|----------------------------|--------------------------|---------------------------------------|
| HALC-1  | 0                           | 6860                                     | 5980                                      | 248                        | 266                      | 361                                   |
| HALC-2  | -0.17                       | 6876                                     | 5968                                      | 216                        | 202                      | 259                                   |
| HALC-4  | 0.45                        | 6818                                     | 6012                                      | 281                        | 289                      | 400                                   |
| HALC-5* | -0.66                       | 6922                                     | 5934                                      | <145                       | 109                      | 119                                   |
| HALC-6* | -0.83                       | 6938                                     | 5922                                      | <190                       | 81                       | 82                                    |
| HALC-7  | 0.78                        | 6787                                     | 6035                                      | 309                        | 303                      | 423                                   |
| HALC-8  | 0.05                        | 6855                                     | 5984                                      | 215                        | 173                      | 213                                   |
| HALC-9  | -0.37                       | 6895                                     | 5954                                      | 164                        | 164                      | 199                                   |
| HALC-10 | -0.27                       | 6885                                     | 5961                                      | 158                        | 160                      | 195                                   |
| HALC-11 | 0.06                        | 6854                                     | 5984                                      | 215                        | 223                      | 292                                   |
| HALC-12 | 0.23                        | 6838                                     | 5996                                      | 226                        | 227                      | 299                                   |
| HALC-13 | 0.23                        | 6838                                     | 5996                                      | 234                        | 230                      | 304                                   |
| HALC-14 | 0.18                        | 6843                                     | 5993                                      | 236                        | 232                      | 307                                   |
| HALC-15 | 0.15                        | 6846                                     | 5991                                      | 246                        | 190                      | 239                                   |
| HALC-16 | 0                           | 6860                                     | 5980                                      | 194                        | 176                      | 218                                   |
| HALC-17 | 0.49                        | 6814                                     | 6014                                      | 284                        | 282                      | 387                                   |
| HALC-18 | 0.72                        | 6792                                     | 6030                                      | 294                        | 289                      | 392                                   |
| HALC-19 | -0.07                       | 6867                                     | 5975                                      | 245                        | 202                      | 256                                   |
| HALC-20 | 0.17                        | 6844                                     | 5992                                      | 259                        | 218                      | 282                                   |
| HALC-21 | 0.26                        | 6836                                     | 5998                                      | 261                        | 217                      | 281                                   |
| HALC-22 | -0.07                       | 6867                                     | 5975                                      | 273                        | 255                      | 344                                   |
| HALC-23 | 0                           | 6860                                     | 5980                                      | 259                        | 261                      | 353                                   |
| HALC-24 | -0.1                        | 6869                                     | 5973                                      | 251                        | 268                      | 366                                   |
| HALC-26 | 0.37                        | 6825                                     | 6006                                      | 231                        | 246                      | 330                                   |
| HALC-27 | 0.39                        | 6823                                     | 6007                                      | 238                        | 252                      | 339                                   |
| HALC-28 | 0.35                        | 6827                                     | 6005                                      | 237                        | 260                      | 353                                   |

\*For HALC-5 and HALC-6, Experimental  $T_{SCO}$  values were unavailable due to them remaining high spin over the liquid range of the solvent.

\*Hammett  $\sigma_p$  and Hammett  $\sigma_m$  values were taken from a previous study by Kershaw Cook et al.<sup>116</sup>

## 5 Prediction of spin states of catalytic intermediates with Kestrel

For each catalytic cycle, typical  $e$  values for each ligand were varied according to trends in bond lengths, nature of bonding and to fit to DFT spin state energies. In the case of disagreement with DFT,  $e$  parameters were freely varied to determine if any fit was possible using Tanabe-Sugano style diagrams. Their analysis allows any alternative parameter fits to be determined and assessed for their chemical feasibility.

### 5.1 Fe(II)-catalysed silylation

Table S54: Tabulation of ligand field parameters used to calculate the spin-state energies of TS1 and INT1 for the Fe<sup>II</sup> silylation catalytic cycle. The ground state predicted by *Kestrel* is shown, with green coloured boxes denoting agreement with DFT<sup>120</sup> and red disagreement.

|      | X $e_\sigma$ | X $e_\pi$ | Silane $e_\sigma$ | Alkene $e_\sigma$ | Alkene $e_\pi$ | Hydride $e_\sigma$ | Racah B | Spin state |
|------|--------------|-----------|-------------------|-------------------|----------------|--------------------|---------|------------|
| TS1  | 7800         | -1500     | 5300              | 7250              | -900           | 8500               | 875     | 5          |
| INT1 | 7800         | -1500     | 5300              | 6600              | -750           | 6800               | 875     | 5          |

Racah C was fixed so that Racah C = 4 × Racah B.

X = 1,10-phenanthroline

### 5.1.1 TS1 parameter variation

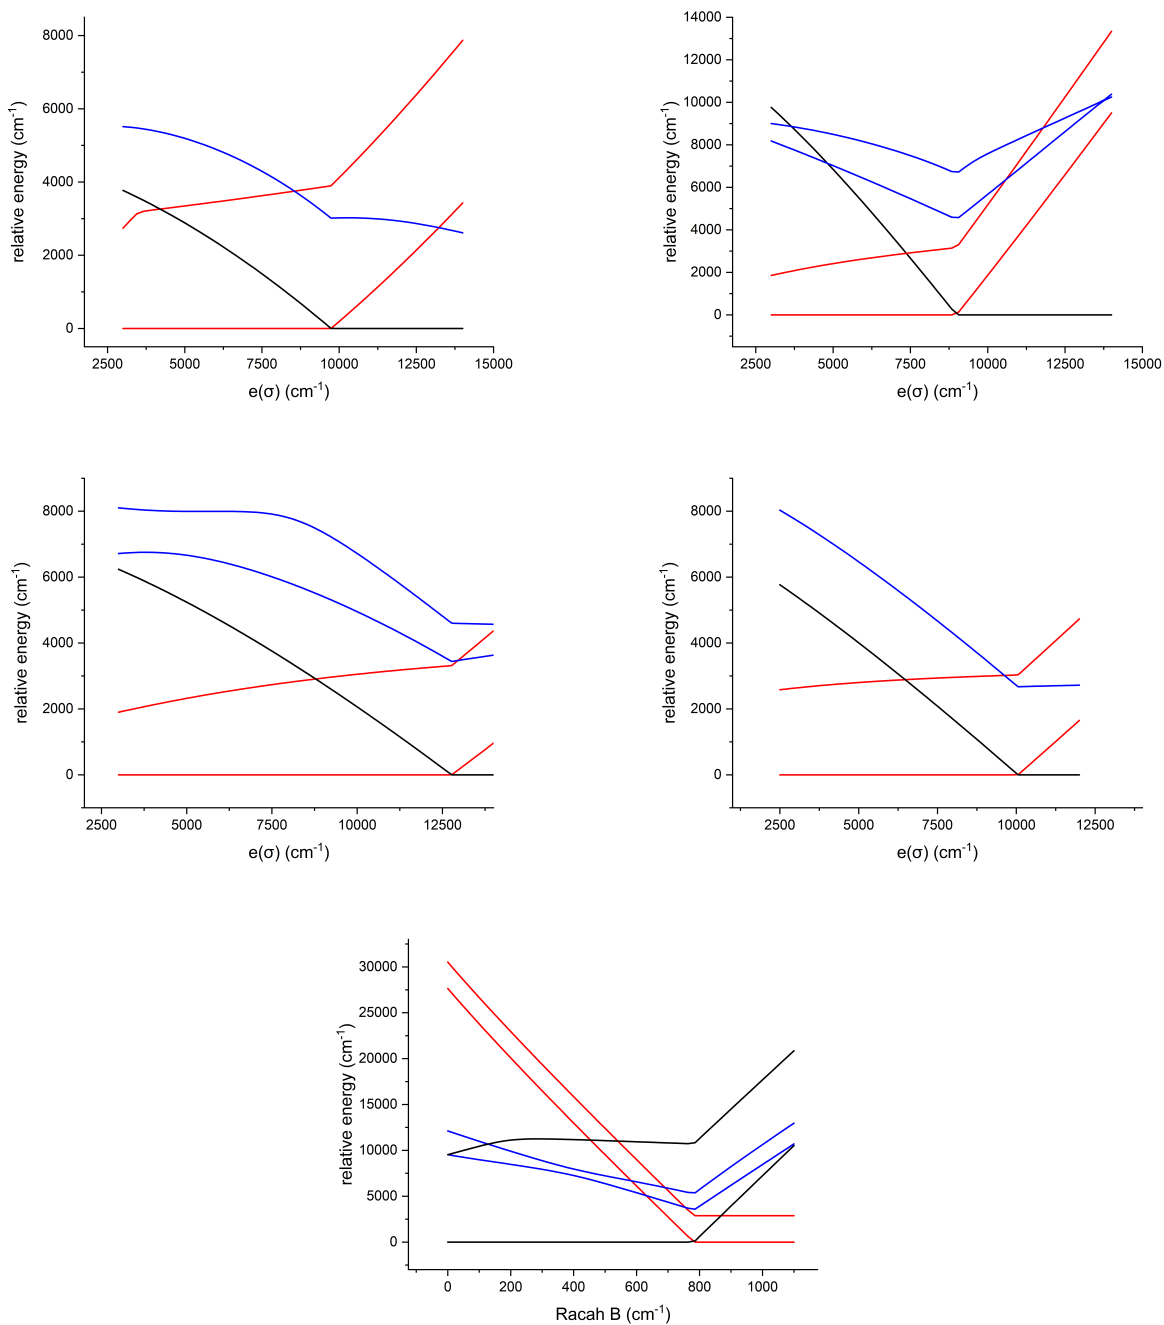

Figure S45: Tanabe-Sugano style diagrams showing how the energies of singlet (black), triplet (blue) and quintet (red) states change upon variation of  $e$  and interelectronic repulsion parameters for TS1. From top left to bottom right: alkene, phenanthroline, hydride, silyl ( $e_\sigma$ ) and Racah B variation graphs. The DFT-predicted triplet ground state for TS1 is not observed at any parameter value.

## 5.2 Fe(III)-catalysed oxidation of styrenes - ligation of O<sub>2</sub>

Table S55: Tabulation of ligand field parameters used to calculate the spin-state energies of RC2, TS2 and INT2 for the Fe(III) dioxygen ligation catalytic cycle. The ground state predicted by *Kestrel* is shown, with green coloured boxes denoting agreement with DFT<sup>121</sup> and red disagreement.

|      | O-O $e_\sigma$ | O-O $e_\pi$ | OTf $e_\sigma$ | X-Py $e_\sigma$ | X-Py $e_\pi$ | X-NH $e_\sigma$ | Racah B | Spin state |
|------|----------------|-------------|----------------|-----------------|--------------|-----------------|---------|------------|
| RC2  | 5900           | 600         | 7000           | 6400            | -800         | 6200            | 925     | 6          |
| TS2  | 5850           | 500         | 7300           | 6450            | -820         | 6250            | 925     | 6          |
| INT2 | 8200           | -1200       | 7200           | 6300            | -770         | 6400            | 925     | 6*         |

Racah C was fixed so that Racah C = 4 × Racah B.

X represents the PyBisulidine ligand coordinated to the Fe(III) centre.

\*For INT2, *Kestrel* predicts significantly higher energies for the doublet and quartet state compared to DFT



## 5.2.1 INT2 parameter variation

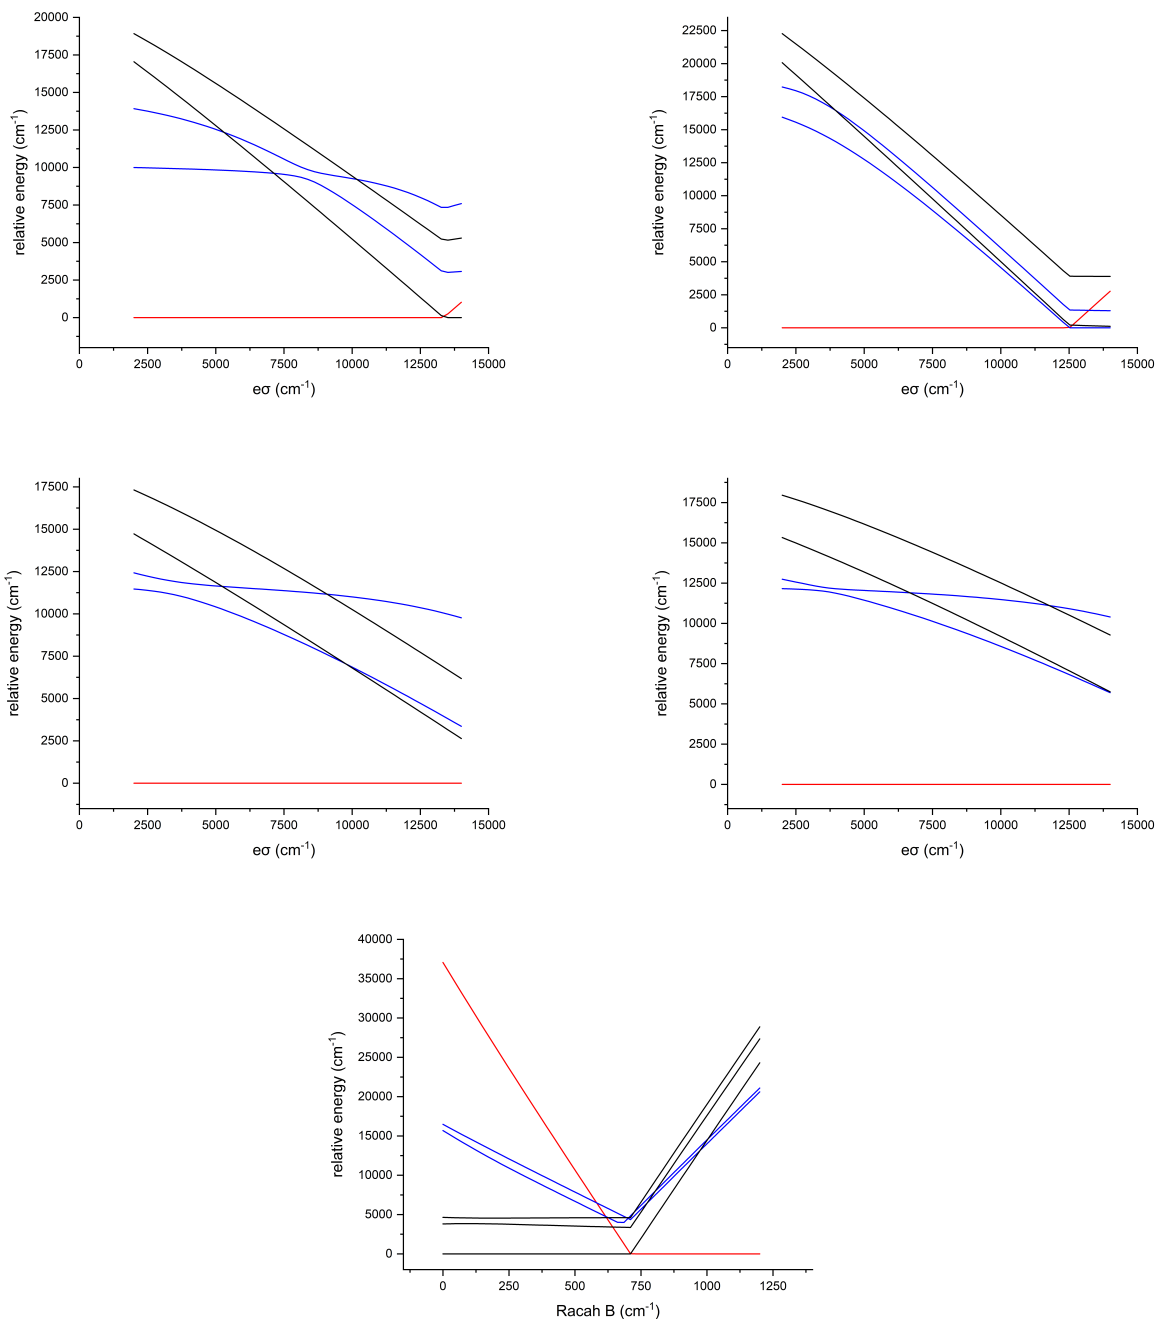

Figure S46: Tanabe-Sugano style diagrams showing how the energies of doublet (black), quartet (blue) and sextet (red) states change upon variation of  $e$  and interelectronic repulsion parameters for INT2. From top left to bottom right: bisulidine (NH), triflate, pyridine, oxygen ( $e_\sigma$ ) and Racah B variation graphs. The sextet ground state and low lying quartet and doublet state predicted by DFT can only be achieved with a chemically unfeasible triflate  $e_\sigma$  parameter (11000 cm<sup>-1</sup>).

### 5.3 Fe(III)–catalysed oxidation of styrene - ligation of olefin

Table S56: Tabulation of ligand field parameters used to calculate the spin-state energies of RC3, TS3 and INT3 for the Fe(III) olefin ligation catalytic cycle. The ground state predicted by *Kestrel* is shown, with green coloured boxes denoting agreement with DFT<sup>121</sup> and red disagreement.

|      | O-O $e_\sigma$ | O-O $e_\pi$ | OTf $e_\sigma$ | X-Py $e_\sigma$ | X-Py $e_\pi$ | X-NH $e_\sigma$ | L $e_\sigma$ | L $e_\pi$ | B   | Spin |
|------|----------------|-------------|----------------|-----------------|--------------|-----------------|--------------|-----------|-----|------|
| RC3  | 0              | 0           | 7400           | 7200            | -1000        | 7200            | 6500         | -750      | 875 | 6    |
| TS3  | 6800           | -700        | 7350           | 7500            | -1250        | 7400            | 7000         | -850      | 875 | 6    |
| INT3 | 8300           | -1000       | 7400           | 7000            | -750         | 7000            | 6800         | -800      | 875 | 6    |

Racah C was fixed so that Racah C = 4 × Racah B.

X represents the PyBisulidine ligand coordinated to the Fe(III) centre.

L represents the styrene ligand.

### 5.3.1 TS3 parameter variation

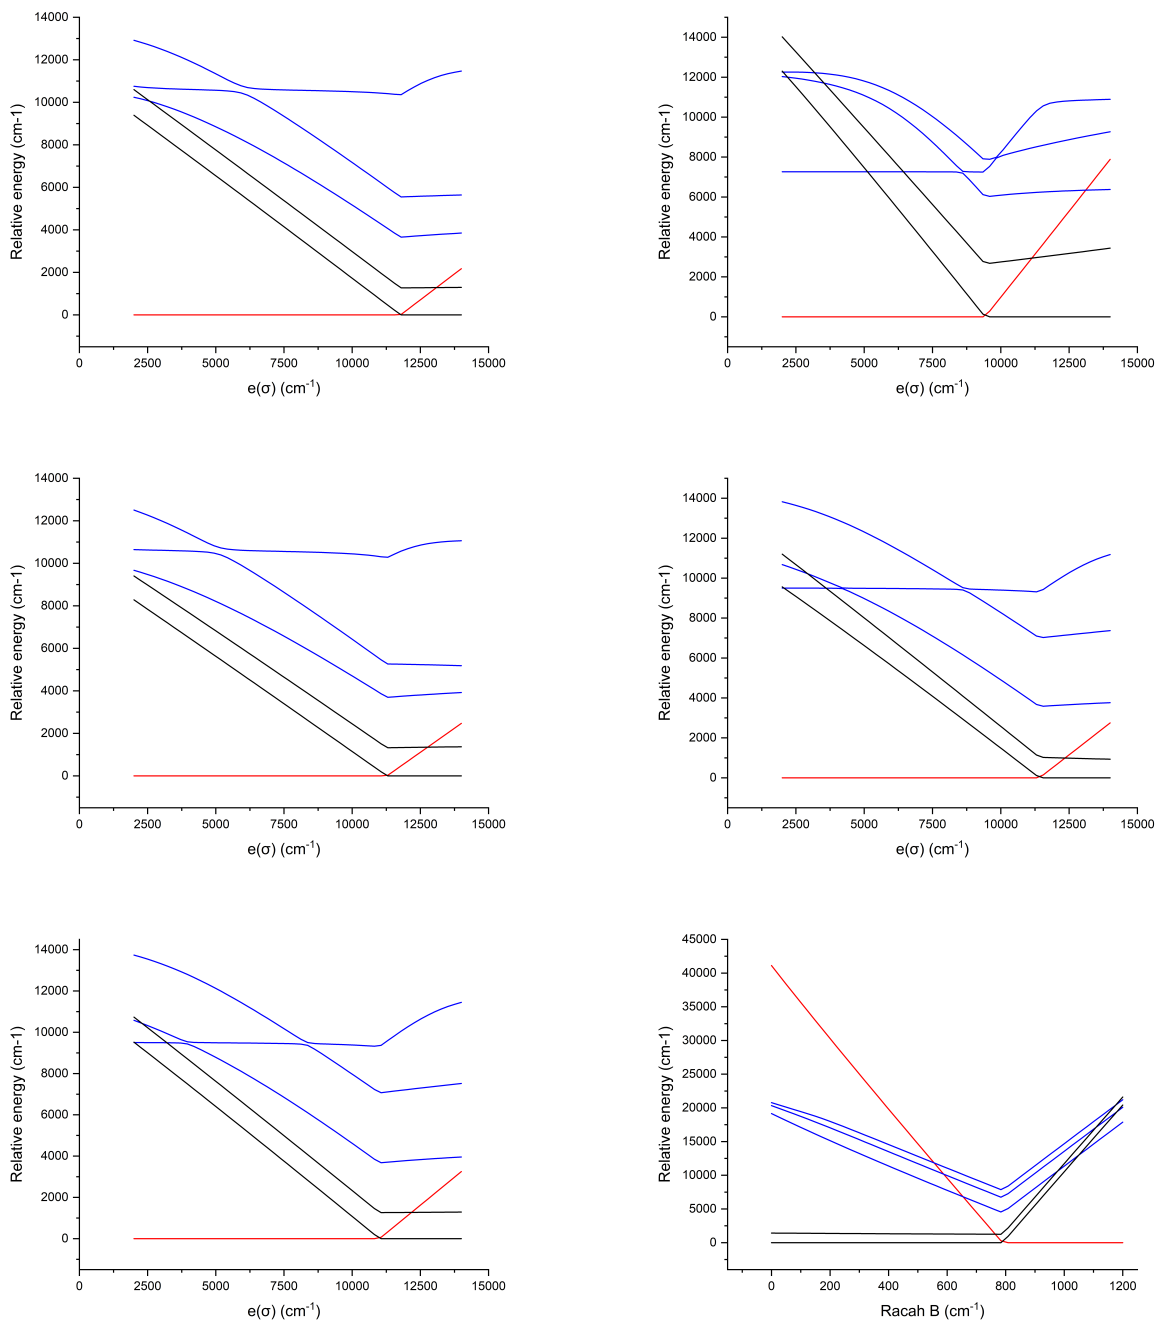

Figure S47: Tanabe-Sugano style diagrams showing how the energies of doublet (black), quartet (blue) and sextet (red) states change upon variation of  $e$  and interelectronic repulsion parameters for INT3. From top left to bottom right: triflate, bisulidine (NH), dioxygen, pyridine, styrene ( $e_\sigma$ ) and Racah B variation graphs. The quartet ground state predicted by DFT is not observed at any parameter value.

### 5.3.2 INT3 parameter variation

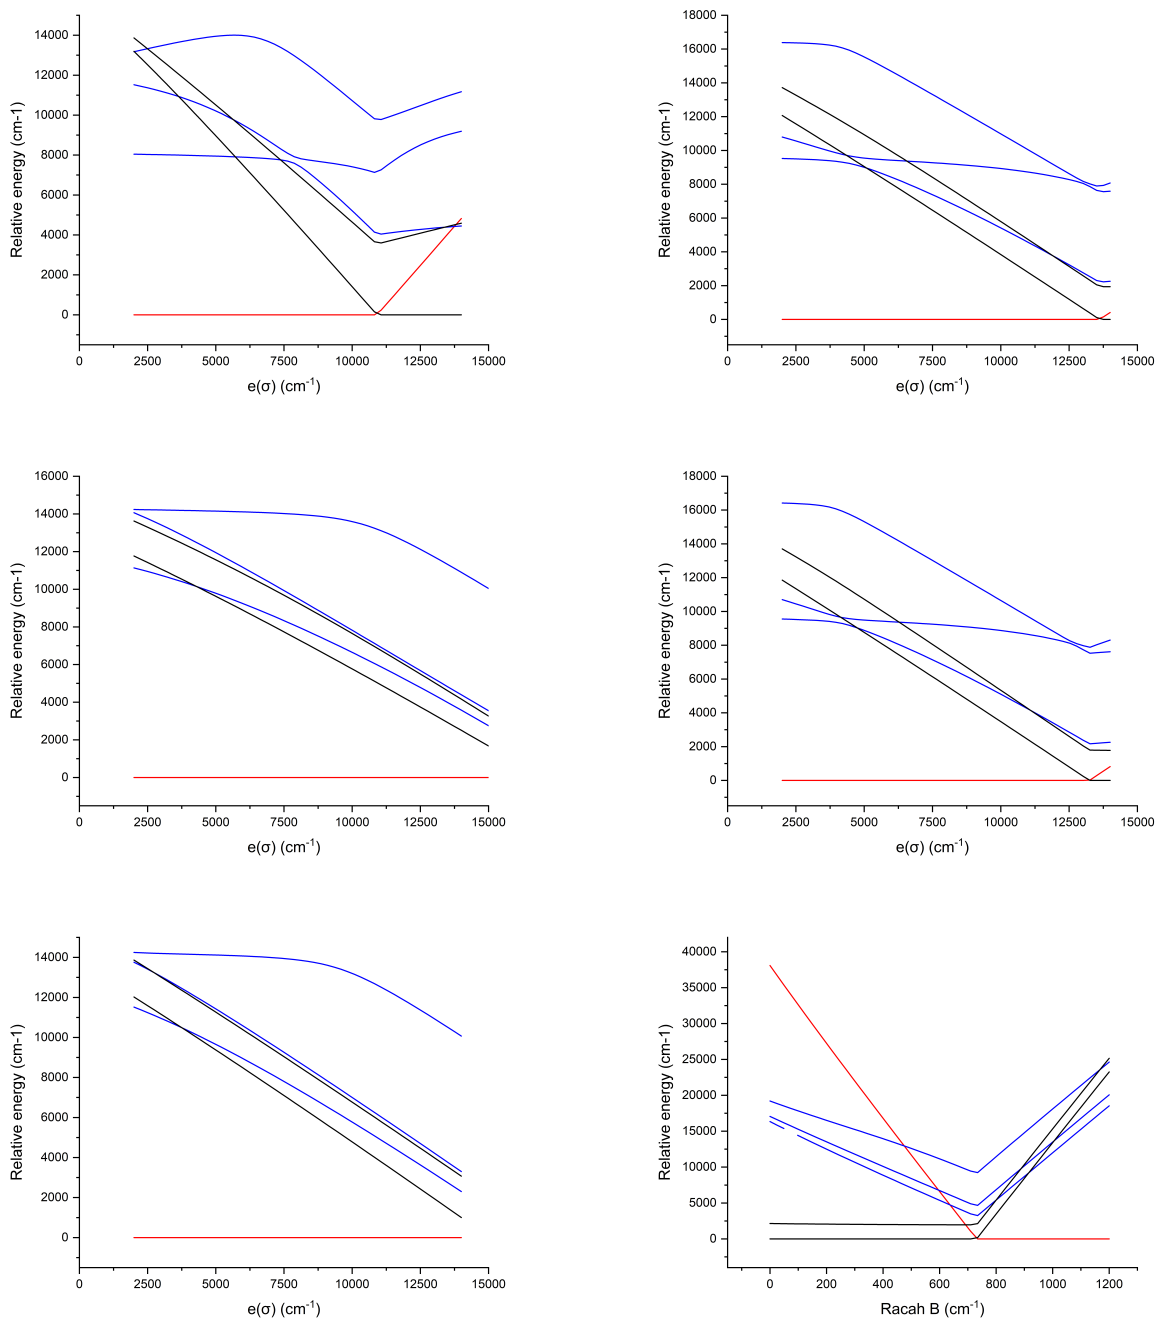

Figure S48: Tanabe-Sugano style diagrams showing how the energies of doublet (black), quartet (blue) and sextet (red) states change upon variation of  $e$  and interelectronic repulsion parameters for INT3. From top left to bottom right: bisulidine, styrene, dioxygen, pyridine, triflate ( $e_\sigma$ ) and Racah B variation graphs. The quartet ground state predicted by DFT is not observed at any parameter value.

## References

- (1) Girolami, G. S.; Wilkinson, G.; Galas, A. M.; Thornton-Pett, M.; Hursthouse, M. B. Synthesis and properties of the divalent 1, 2-bis (dimethylphosphino) ethane (dmpe) complexes  $MCl_2(dmpe)_2$  and  $MMe_2(dmpe)_2$  ( $M = Ti, V, Cr, Mn, \text{ or } Fe$ ). X-Ray crystal structures of  $MCl_2(dmpe)_2$  ( $M = Ti, V, \text{ or } Cr$ ),  $MnBr_2(dmpe)_2$ ,  $TiMe_1.3Cl_{0.7}(dmpe)_2$ , and  $CrMe_2(dmpe)_2$ . *Journal of the Chemical Society, Dalton Transactions* **1985**, 1339–1348.
- (2) Broderick, W. E.; Pressprich, M. R.; Geiser, U.; Willett, R. D.; Legg, J. I. Characterization of an air-stable chromium (II) dinicotinate complex:  $trans-[Cr(II)(nic-N)_2(H_2O)_4]$ . *Inorganic Chemistry* **1986**, *25*, 3372–3377.
- (3) Deng, Y.-F.; Han, T.; Wang, Z.; Ouyang, Z.; Yin, B.; Zheng, Z.; Krzystek, J.; Zheng, Y.-Z. Uniaxial magnetic anisotropy of square-planar chromium (II) complexes revealed by magnetic and HF-EPR studies. *Chemical communications* **2015**, *51*, 17688–17691.
- (4) Ferreira, V.; Krause, R. A.; Larsen, S. Synthesis and structure of cis-dichlorobis (2-phenylazopyridine) chromium (II), an inert chromium (II) compound. *Inorganica chimica acta* **1988**, *145*, 29–38.
- (5) Overby, J. S.; Schoell, N. J.; Hanusa, T. P. Synthesis and characterization of chromocenes containing bulky cyclopentadienyl ligands. *Journal of organometallic chemistry* **1998**, *560*, 15–19.
- (6) Frazier, B. A.; Wolczanski, P. T.; Lobkovsky, E. B. Aryl-Containing Chelates and Amine Debenzylation to Afford 1, 3-Di-2-pyridyl-2-azaallyl (smif): Structures of  $\{\kappa-C, N, Npy_2-(2\text{-pyridylmethyl})_2N(CH_2(4\text{-tBu-phenyl-2-yl}))\} FeBr$  and (smif)  $CrN(TMS)_2$ . *Inorganic Chemistry* **2009**, *48*, 11576–11585.

- (7) Jubb, J.; Larkworthy, L. F.; Leonard, G. A.; Povey, D. C.; Tucker, B. J. Stacked planar molecules in antiferromagnetic di-isothiocyanato-bis (thiourea) chromium (II), a new structural type for chromium (II). *Journal of the Chemical Society, Dalton Transactions* **1989**, 1631–1633.
- (8) Desai, V.; König, E.; Kanellakopulos, B. Magnetic susceptibility and electron paramagnetic resonance of chromocene and 1, 1'-dimethyl-chromocene: Evidence for the dynamic Jahn–Teller effect. *The Journal of Chemical Physics* **1983**, *78*, 6299–6306.
- (9) Zhai, Y.-Q.; Ge, N.; Li, Z.-H.; Chen, W.-P.; Han, T.; Ouyang, Z.-W.; Wang, Z.; Zheng, Y.-Z. Magnetic Anisotropy: Structural Correlation of a Series of Chromium (II)–Amidinate Complexes. *Inorganic Chemistry* **2021**, *60*, 1344–1351.
- (10) Konarev, D. V.; Khasanov, S. S.; Kuzmin, A. V.; Shestakov, A. F.; Otsuka, A.; Yamochi, H.; Saito, G.; Lyubovskaya, R. N. cis-Conformation of indigo in the coordination complex (indigo-O, O)(Cp\* Cr II Cl). *Dalton Transactions* **2016**, *45*, 17095–17099.
- (11) Paolucci, G.; Ossola, F.; Bettinelli, M.; Sessoli, R.; Benetollo, F.; Bombieri, G. Bent Metallocenes Containing Ancillary Ligands in Ring-Bridging Chains. Synthesis, Spectroscopy, and X-ray Crystal Structure of [2, 6-Bis (methylenecyclopentadienyl) pyridine] chromium (II). *Organometallics* **1994**, *13*, 1746–1750.
- (12) Boynton, J. N.; Merrill, W. A.; Reiff, W. M.; Fettinger, J. C.; Power, P. P. Two-Coordinate, Quasi-Two-Coordinate, and Distorted Three Coordinate, T-Shaped Chromium (II) Amido Complexes: Unusual Effects of Coordination Geometry on the Lowering of Ground State Magnetic Moments. *Inorganic Chemistry* **2012**, *51*, 3212–3219.
- (13) Luo, Q.-C.; Ge, N.; Zhai, Y.-Q.; Wang, T.-B.; Sun, L.; Sun, Q.; Li, F.; Ouyang, Z.; Wang, Z.-X.; Zheng, Y.-Z. AC, S bonded quasi-two-coordinate chromium (ii) complex

- showing field-induced slow magnetic relaxation behaviour. *Dalton Transactions* **2022**, *51*, 9218–9222.
- (14) Jubb, J.; Larkworthy, L. F.; Oliver, L. F.; Povey, D. C.; Smith, G. W. Chromium (II) complexes of o-phenylenediamine. The crystal and molecular structures of bis (o-phenylenediamine- $\kappa$  N)-bis (thiocyanato- $\kappa$  N) chromium (II) and bis (o-phenylenediamine- $\kappa$  2 N, N') bis (o-phenylenediamine- $\kappa$  N) chromium (II) trifluoromethanesulphonate. *Journal of the Chemical Society, Dalton Transactions* **1991**, 2045–2050.
- (15) Schiwiek, C. H.; Vasilenko, V.; Wadepohl, H.; Gade, L. H. The open d-shell enforces the active space in 3d metal catalysis: highly enantioselective chromium (ii) pincer catalysed hydrosilylation of ketones. *Chemical communications* **2018**, *54*, 9139–9142.
- (16) Halepoto, D. M.; Holt, D. G.; Larkworthy, L. F.; Leigh, G. J.; Povey, D. C.; Smith, G. W. Spin crossover in chromium (II) complexes and the crystal and molecular structure of the high spin form of bis [1, 2-bis (diethylphosphino) ethane] diiodochromium (II). *Journal of the Chemical Society, Chemical Communications* **1989**, 1322–1323.
- (17) O'Hare, D.; Murphy, V. J.; Kaltsoyannis, N. Synthesis and characterisation of permethylindenyl complexes of cobalt and chromium: crystal structures of [Cr ( $\eta$  5-C 9 Me 7) 2],[Co ( $\eta$  5-C 9 Me 7) 2][PF 6] and [Cr ( $\eta$  5-C 9 Me 7) 2][PF 6]. *Journal of the Chemical Society, Dalton Transactions* **1993**, 383–392.
- (18) Adams, R. D.; Miao, S.; Smith, M. D.; Farach, H.; Webster, C. E.; Manson, J.; Hall, M. B. Nickel- Manganese Sulfido Carbonyl Cluster Complexes. Synthesis, Structure, and Properties of the Unusual Paramagnetic Complexes Cp<sub>2</sub>Ni<sub>2</sub>Mn (CO)<sub>3</sub> ( $\mu$ <sup>3</sup>-E) 2, E= S, Se. *Inorganic chemistry* **2004**, *43*, 2515–2525.
- (19) Wu, J.-Z.; Bouwman, E.; Mills, A. M.; Spek, A. L.; Reedijk, J. Manganese (II) com-

- plexes of a set of 2-aminomethylpyridine-derived ligands bearing a methoxyalkyl arm: syntheses, structures and magnetism. *Inorganica chimica acta* **2004**, *357*, 2694–2702.
- (20) Lumme, P.; Mutikainen, I.; Lindell, E. x-ray Structure of Trans-tetrakis (pyrazole) bisisothiocyanatomanganese (II) and its Magnetic, Spectral and Thermal Properties. *Inorganica Chimica Acta* **1983**, *71*, 217–226.
- (21) Walter, M. D.; Sofield, C. D.; Booth, C. H.; Andersen, R. A. Spin equilibria in monomeric manganese: solid-state magnetic and EXAFS studies. *Organometallics* **2009**, *28*, 2005–2019.
- (22) Mueller, G.; Neugebauer, D.; Geike, W.; Koehler, F. H.; Pebler, J.; Schmidbaur, H. Bis [boranatobis (dimethylphosphoniumylidenemethylide)] complexes of manganese (II) and cobalt (II): stable, homoleptic tetraalkyls of paramagnetic transition-metal centers. *Organometallics* **1983**, *2*, 257–263.
- (23) Howard, C. G.; Girolami, G. S.; Wilkinson, G.; Thornton-Pett, M.; Hursthouse, M. B. Tertiary phosphine adducts of manganese (II) dialkyls. Part 2. Synthesis, properties, and structures of monomeric complexes. *Journal of the Chemical Society, Dalton Transactions* **1983**, 2631–2637.
- (24) Małecki, J.; Machura, B.; Świtlicka, A.; Groń, T.; Bałanda, M. Thiocyanate manganese (II) complexes with pyridine and its derivatives ligands. *Polyhedron* **2011**, *30*, 746–753.
- (25) Hong, D.-M.; Wei, H.-H.; Chang, K.-H.; Lee, G.-H.; Wang, Y. Synthesis, crystal structure and magnetic properties of bis (1, 1, 1, 5, 5, 5-hexafluoropentane-2, 4-dionato) manganese (II) complexes with diazine ligands. *Polyhedron* **1998**, *17*, 3565–3573.
- (26) Hubin, T. J.; McCormick, J. M.; Collinson, S. R.; Buchalova, M.; Perkins, C. M.; Alcock, N. W.; Kahol, P. K.; Raghunathan, A.; Busch, D. H. New iron (II) and

- manganese (II) complexes of two ultra-rigid, cross-bridged tetraazamacrocycles for catalysis and biomimicry. *Journal of the American Chemical Society* **2000**, *122*, 2512–2522.
- (27) Shen, L. Synthesis, crystal structure and magnetic property of a novel sheet-like polymer  $[\text{Mn}(\text{bpd})(\text{NCS})_2(\text{CH}_3\text{OH})_2]_n$  (bpd= 1, 4-bis (4-pyridyl)-2, 3-diaza-1, 3-butadiene). *Inorganic Chemistry Communications* **2003**, *6*, 1133–1136.
- (28) Janczak, J.; Kubiak, R.; Śledź, M.; Borrmann, H.; Grin, Y. Synthesis, structural investigations and magnetic properties of dipyridinated manganese phthalocyanine,  $\text{MnPc}(\text{py})_2$ . *Polyhedron* **2003**, *22*, 2689–2697.
- (29) Yu, M.; Ward, M. B.; Franke, A.; Ambrose, S. L.; Whaley, Z. L.; Bradford, T. M.; Gorden, J. D.; Beyers, R. J.; Cattley, R. C.; Ivanovic-Burmazovic, I.; others Adding a second quinol to a redox-responsive MRI contrast agent improves its relaxivity response to  $\text{H}_2\text{O}_2$ . *Inorganic Chemistry* **2017**, *56*, 2812–2826.
- (30) Deguenon, D.; Bernardinelli, G.; Tuchagues, J. P.; Castan, P. Molecular crystal structure and magnetic properties of (croconato)-and (oxalato) manganese (II) complexes. *Inorganic Chemistry* **1990**, *29*, 3031–3037.
- (31) Figgis, B. N.; Kucharski, E. S.; Williams, G. A. Manganese 3 d and 4 s electron-density distribution in phthalocyaninatomanganese (II). *Journal of the Chemical Society, Dalton Transactions* **1980**, 1515–1525.
- (32) Price, J. S.; Chadha, P.; Emslie, D. J. Base-free and bisphosphine ligand dialkylmanganese (II) complexes as precursors for manganese metal deposition. *Organometallics* **2016**, *35*, 168–180.
- (33) Bellabarba, R. M.; Clancy, G. P.; Gomes, P. T.; Martins, A. M.; Rees, L. H.; Green, M. L. Synthesis of metallocenes of zirconium, hafnium, manganese, iron, tin,

- lead and half-sandwich complexes of rhodium and iridium containing the ligands ( $\eta$ -C<sub>5</sub>R<sub>4</sub>CR' 2PMe<sub>2</sub>), where R and R' may be H or Me. *Journal of organometallic chemistry* **2001**, *640*, 93–112.
- (34) Yu, L.; Shi, J.-M.; Zhang, Y.-Q.; Wang, Y.-Q.; Fan, Y.-N.; Zhang, G.-Q.; Shi, W.; Cheng, P.  $\pi$ - $\pi$  Stacking and magnetic coupling mechanism on a mono-nuclear Mn (II) complex. *Journal of molecular structure* **2011**, *987*, 138–143.
- (35) Uzelac, M.; Mastropiero, P.; de Tullio, M.; Borilovic, I.; Tarrés, M.; Kennedy, A. R.; Aromí, G.; Hevia, E. Tandem Mn–I exchange and homocoupling processes mediated by a synergistically operative lithium manganate. *Angewandte Chemie International Edition* **2021**, *60*, 3247–3253.
- (36) MacáRory, P. P.; others Preparation, properties, and reactions with sulphur dioxide of triphenylphosphine oxide complexes of manganese (II) thiocyanate. Crystal structures of [ $\{Mn(OPPh_3)_2(NCS)(\acute{A}-NCS)\}_2$ ], [ $Mn(OPPh_3)_4(NCS)_2$ ], and (PPh<sub>3</sub>O)(PPh<sub>3</sub>OH)(HSO<sub>4</sub>), a derivative of sulphuric acid formed under ambient air oxidation of sulphur dioxide. *Journal of the Chemical Society, Dalton Transactions* **1990**, 1243–1250.
- (37) Karasawa, S.; Sano, Y.; Akita, T.; Koga, N.; Itoh, T.; Iwamura, H.; Rabu, P.; Drillon, M. Photochemical formation of ferrimagnetic chains from a pair of polymeric complexes made of octahedral bis (hexafluoroacetylacetonato) manganese (II) with diazodi (4-pyridyl) methane in the cis and trans configurations as repeating units. *Journal of the American Chemical Society* **1998**, *120*, 10080–10087.
- (38) Beghidja, C.; Wesolek, M.; Welter, R. New manganese complexes with 2-salicyloylhydrazono-1, 3-dithiolane ligand and various coordination solvents. *Inorganica chimica acta* **2005**, *358*, 3881–3888.
- (39) Ricciardi, G.; Bencini, A.; Bavoso, A.; Rosa, A.; Lelj, F. Crystal structure of high-spin

- (S= 5/2) manganese (II) 2, 3, 7, 8, 12, 13, 17, 18-octakis (ethylsulfanyl)-5, 10, 15, 20-tetraazaporphyrinate. *Journal of the Chemical Society, Dalton Transactions* **1996**, 3243–3249.
- (40) El-Azzouzi, N.; Hueso-Ureña, F.; Illán-Cabeza, N. A.; Moreno-Carretero, M. N. XRD structure of two heptacoordinated Mn (II) complexes containing 2, 9-dimethyl-1, 10-phenanthroline (phen), nitrate and nicotinate bidentate anions: [Mn (phen)(nicot)(NO<sub>3</sub>)(H<sub>2</sub>O)]· EtOH· H<sub>2</sub>O and [Mn (phen)(NO<sub>3</sub>)<sub>2</sub> (H<sub>2</sub>O)]. *Polyhedron* **2010**, *29*, 1405–1410.
- (41) Shen, H.-Y.; Liao, D.-Z.; Jiang, Z.-H.; Yan, S.-P.; Sun, B.-W.; Wang, G.-L.; Yao, X.-K.; Wang, H.-G. A new one-dimensional 4, 4'-bipy-bridged compound [Mn (hfac)<sub>2</sub> (4, 4'-bipy)]<sub>n</sub> (hfac= hexafluoroacetetylacetonato; 4, 4'-bipy= 4, 4'-bipyridine). Synthesis, crystal structure and magnetic properties. *Polyhedron* **1998**, *17*, 1953–1957.
- (42) Hays, M. L.; Burkey, D. J.; Overby, J. S.; Hanusa, T. P.; Sellers, S. P.; Yee, G. T.; Young, V. G. Steric influence on the structure, magnetic properties, and reactivity of hexa- and octaisopropylmanganocene. *Organometallics* **1998**, *17*, 5521–5527.
- (43) King, E. R.; Betley, T. A. Unusual electronic structure of first row transition metal complexes featuring redox-active dipyrromethane ligands. *Journal of the American Chemical Society* **2009**, *131*, 14374–14380.
- (44) Baldwin, M. J.; Kampf, J. W.; Kirk, M. L.; Pecoraro, V. L. Structural and magnetic Studies of Manganese (II) Complexes of the Imidazole-Containing Ligand 5-NO<sub>2</sub>-salimH [5-NO<sub>2</sub>-salimH<sub>2</sub>= 4-(2-((5-nitrosalicylidene) amino) ethyl) imidazole] with Varying Nuclearity. *Inorganic Chemistry* **1995**, *34*, 5252–5260.
- (45) Phillippi, M. A.; Baenziger, N.; Goff, H. M. Preparation, solution properties, and structure of iron (III) porphyrin oxyanion complexes. Crystal and molecular stereo-

- chemistry of a novel bidentate nitrate complex. *Inorganic Chemistry* **1981**, *20*, 3904–3911.
- (46) Berry, K. J.; Clark, P. E.; Murray, K. S.; Raston, C. L.; White, A. H. Structure, magnetism, and Moessbauer spectrum of the five-coordinate complex chlorobis (N-methylbenzothiohydroxamato) iron (III). *Inorganic Chemistry* **1983**, *22*, 3928–3934.
- (47) Glockner, A.; Bannenberg, T.; Ibrom, K.; Daniliuc, C. G.; Freytag, M.; Jones, P. G.; Walter, M. D.; Tamm, M. Flexibility of an Open Indenyl Ligand in Iron (II) Complexes. *Organometallics* **2012**, *31*, 4480–4494.
- (48) Yahsi, Y.; Kara, H.; Sorace, L.; Buyukgungor, O. Mono- and dinuclear Fe (III) complexes with the N<sub>2</sub>O<sub>2</sub> donor 5-chlorosalicylideneimine ligands; synthesis, X-ray structural characterization and magnetic properties. *Inorganica Chimica Acta* **2011**, *366*, 191–197.
- (49) Martins, N. M.; Mahmudov, K. T.; da Silva, M. F. C. G.; Martins, L. M.; Pombeiro, A. J. Copper (II) and iron (III) complexes with arylhydrazone of ethyl 2-cyanoacetate or formazan ligands as catalysts for oxidation of alcohols. *New Journal of Chemistry* **2016**, *40*, 10071–10083.
- (50) Diaz-Acosta, I.; Baker, J.; Cordes, W.; Pulay, P. Calculated and experimental geometries and infrared spectra of metal tris-acetylacetonates: vibrational spectroscopy as a probe of molecular structure for ionic complexes. Part I. *The journal of physical chemistry a* **2001**, *105*, 238–244.
- (51) Masárová, P.; Zoufalý, P.; Moncol, J.; Nemeč, I.; Pavlík, J.; Gembický, M.; Trávníček, Z.; Boča, R.; Šalitroš, I. Spin crossover and high spin electroneutral mononuclear iron (III) Schiff base complexes involving terminal pseudohalido ligands. *New Journal of Chemistry* **2015**, *39*, 508–519.

- (52) Abdol Abadi, B. E.; Palmer, R. A.; Fitzsimmons, B. W. Crystal structure of form 1, magnetic properties and polymorphism of bis (NN-di-(n-propyl) dithiocarbamate iron (III) iodide. *Journal of crystallographic and spectroscopic research* **1988**, *18*, 35–53.
- (53) Grande, L. M.; Noll, B. C.; Oliver, A. G.; Scheidt, W. R. Dynamics of NO motion in solid-state [Co (tetraphenylporphinato)(NO)]. *Inorganic chemistry* **2010**, *49*, 6552–6557.
- (54) Shedbalkar, V.; Dugad, L.; Mazumdar, S.; Mitra, S. Electronic structure of synthetic iron (III) porphyrins in pyridine and pyridinewater solutions: A proton magnetic resonance study. *Inorganica chimica acta* **1988**, *148*, 17–20.
- (55) Dunbar, K. R.; Haefner, S. C.; Quillevéré, A. Synthesis and characterization of [{2, 4, 6-(CH<sub>3</sub>O) 3C<sub>6</sub>H<sub>2</sub>} 3P O] FeCl<sub>3</sub>: A four-coordinate phosphine oxide adduct of FeCl<sub>3</sub>. *Polyhedron* **1990**, *9*, 1695–1702.
- (56) Harriman, K. L.; Leitch, A. A.; Stoian, S. A.; Habib, F.; Kneebone, J. L.; Gorelsky, S. I.; Korobkov, I.; Desgreniers, S.; Neidig, M. L.; Hill, S.; others Ambivalent binding between a radical-based pincer ligand and iron. *Dalton Transactions* **2015**, *44*, 10516–10523.
- (57) Kooijman, H.; Spek, A. L.; Hoogenraad, M.; Bouwman, E.; Haasnoot, J. G.; Reedijk, J. Tris [2-(2-oxazolin-2-yl) phenolato] iron (III). *Acta Crystallographica Section C: Crystal Structure Communications* **2002**, *58*, m390–m392.
- (58) Masuda, H.; Taga, T.; Osaki, K.; Sugimoto, H.; Yoshida, Z.; Ogoshi, H. Crystal and molecular structure of (octaethylporphinato) iron (III) perchlorate. Anomalous magnetic properties and structural aspects. *Inorganic Chemistry* **1980**, *19*, 950–955.
- (59) Palamarciuc, O. V.; Bourosh, P. N.; Revenco, M. D.; Lipkowski, J.; Simonov, Y. A.; Clérac, R. Synthesis, crystal structure and characterizations of iron (III) and copper

- (II) complexes with the hydrazone ligand obtained from 2-formyl-pyridine and Girard's T reagent. *Inorganica Chimica Acta* **2010**, *363*, 2561–2566.
- (60) Huxel, T.; Leone, S.; Lan, Y.; Demeshko, S.; Klingele, J. 2-Amino-4-(2-pyridyl) thiazole as Chelating Ligand: A Dinuclear Oxido-Bridged Ferric Complex and Mononuclear 3d Metal Complexes. *European Journal of Inorganic Chemistry* **2014**, *2014*, 3114–3124.
- (61) Pascualini, M. E.; Di Russo, N. V.; Quintero, P. A.; Thuijs, A. E.; Pinkowicz, D.; Abboud, K. A.; Dunbar, K. R.; Christou, G.; Meisel, M. W.; Veige, A. S. Synthesis, Characterization, and Reactivity of Iron (III) Complexes Supported by a Trianionic ONO<sup>3-</sup>-Pincer Ligand. *Inorganic Chemistry* **2014**, *53*, 13078–13088.
- (62) Walker, J. D.; Poli, R. Trichloroiron (FeCl<sub>3</sub>)-phosphine adducts with trigonal-bipyramidal geometry. Influence of the phosphine on the spin state. *Inorganic Chemistry* **1989**, *28*, 1793–1801.
- (63) Kopf, M.-A.; Varech, D.; Tuchagues, J.-P.; Mansuy, D.; Artaud, I. New intermediate-spin chloroiron (III) complex with a mixed nitrogen–sulfur co-ordination sphere. *Journal of the Chemical Society, Dalton Transactions* **1998**, 991–998.
- (64) Slep, L. D.; Calvo, R.; Nascimento, O. R.; Baggio, R.; Garland, M. T.; Peña, O.; Perec, M. A seven-coordinate FeIII compound: [Fe {O (CH<sub>2</sub>CO<sub>2</sub>)<sub>2</sub> (H<sub>2</sub>O)<sub>2</sub> (NO<sub>3</sub>)}]. Preparation, structure and magnetic properties. *Inorganica chimica acta* **2007**, *360*, 2911–2916.
- (65) Ricciardi, G.; Bavoso, A.; Bencini, A.; Rosa, A.; Lelj, F.; Bonosi, F. Synthesis, structure, magnetic, spectroscopic and electrochemical behaviour of chloro-iron (III) and manganese (III) complexes of 2, 3, 7, 8, 12, 13, 17, 18-octakis (ethylsulfanyl)-5, 10, 15, 20-tetraazaporphyrin. *Journal of the Chemical Society, Dalton Transactions* **1996**, 2799–2807.

- (66) Butsch, K.; Haseloer, A.; Schmitz, S.; Ott, I.; Schur, J.; Klein, A. FeIII, CuII and ZnII complexes of the rigid 9-oxido-phenalenone ligand—Spectroscopy, electrochemistry, and cytotoxic properties. *International journal of molecular sciences* **2021**, *22*, 3976.
- (67) Rajnák, C.; Mičová, R.; Moncol', J.; Dlháň, L.; Krüger, C.; Renz, F.; Boča, R. Spin-crossover in an iron (iii) complex showing a broad thermal hysteresis. *Dalton Transactions* **2021**, *50*, 472–475.
- (68) Šalitroš, I.; Boča, R.; Dlháň, L.; Gembický, M.; Kožíšek, J.; Linares, J.; Moncol', J.; Nemeč, I.; Perašínová, L.; Renz, F.; others Unconventional spin crossover in dinuclear and trinuclear iron (III) complexes with cyanido and metallacyanido bridges. 2009.
- (69) Sarwar, M.; Madalan, A. M.; Lloret, F.; Julve, M.; Andruh, M. Mononuclear Fe (III) and tetranuclear [Fe (III) Gd (III)]<sub>2</sub> complexes with a Schiff-base ligand derived from the o-vanillin: Synthesis, crystal structures and magnetic properties. *Polyhedron* **2011**, *30*, 2414–2420.
- (70) Mikuriya, M.; Kushida, K.; Nakayama, H.; Mori, W.; Kishita, M. A unique mononuclear iron (III) complex with the binucleating ligand 2, 6-bis [N-(2-pyridylethyl)iminomethyl]-4-methylphenol. *Inorganica chimica acta* **1989**, *165*, 35–36.
- (71) Cotton, F. A.; Luck, R. L.; Son, K.-A. New polynuclear compounds of iron (II) chloride with oxygen donor ligands Part I. Fe<sub>4</sub>Cl<sub>8</sub> (THF)<sub>6</sub>: Synthesis and a single crystal X-ray structure determination. *Inorganica chimica acta* **1991**, *179*, 11–15.
- (72) Tyagi, N.; Chakraborty, A.; Singh, U. P.; Roy, P.; Ghosh, K. Mononuclear iron (III) complexes of tridentate ligands with efficient nuclease activity and studies of their cytotoxicity. *Organic & Biomolecular Chemistry* **2015**, *13*, 11445–11458.
- (73) Oliver, J.; Mullica, D.; Hutchinson, B.; Milligan, W. Iron-nitrogen bond lengths in low-spin and high-spin iron (II) complexes with poly (pyrazolyl) borate ligands. *Inorganic Chemistry* **1980**, *19*, 165–169.

- (74) Marchivie, M.; Guionneau, P.; Howard, J. A.; Chastanet, G.; Létard, J.-F.; Goeta, A. E.; Chasseau, D. Structural characterization of a photoinduced molecular switch. *Journal of the American Chemical Society* **2002**, *124*, 194–195.
- (75) Campbell, C. J.; Muetterties, A. T.; Chan, B. C.; Reisner, B. A. New polymorphs of hydrotris (1, 2, 4-triazolyl) borate complexes with M<sup>2+</sup> cations (M= Fe, Co, Ni, Zn). *Inorganica Chimica Acta* **2018**, *473*, 275–281.
- (76) Thompson, A. L.; Goeta, A. E.; Real, J. A.; Galet, A.; Muñoz, M. C. Thermal and light induced polymorphism in iron (II) spin crossover compounds. *Chemical communications* **2004**, 1390–1391.
- (77) Li, B.; Wei, R.-J.; Tao, J.; Huang, R.-B.; Zheng, L.-S. Pressure effects on a spin-crossover monomeric compound [Fe (pmea)(SCN) 2](pmea= bis [(2-pyridyl) methyl]-2-(2-pyridyl) ethylamine). *Inorganic chemistry* **2010**, *49*, 745–751.
- (78) Long, G. J.; Galeazzi, G.; Russo, U.; Valle, G.; Calogero, S. A Moessbauer, magnetic, and single-crystal x-ray structural study of trans-bis (4-acetylpyridine) diaquabis (isothiocyanato) iron (II). *Inorganic Chemistry* **1983**, *22*, 507–510.
- (79) Taylor, R. A.; Lough, A. J.; Seda, T.; Poddutoori, P. K.; Lemaire, M. T. Di-and trivalent iron complexes with redox-active 1-(2-pyridylazo)-2-phenanthrol (papl). *Polyhedron* **2017**, *123*, 462–469.
- (80) Das, O.; Chatterjee, S.; Paine, T. K. Functional models of  $\alpha$ -keto acid dependent non-heme iron oxygenases: synthesis and reactivity of biomimetic iron (II) benzoylformate complexes supported by a 2, 9-dimethyl-1, 10-phenanthroline ligand. *JBIC Journal of Biological Inorganic Chemistry* **2013**, *18*, 401–410.
- (81) Strauss, S. H.; Silver, M. E.; Long, K. M.; Thompson, R. G.; Hudgens, R. A.; Spertalian, K.; Ibers, J. A. Comparison of the molecular and electronic structures of (2,

- 3, 7, 8, 12, 13, 17, 18-octaethylporphyrinato) iron (II) and (trans-7, 8-dihydro-2, 3, 7, 8, 12, 13, 17, 18-octaethylporphyrinato) iron (II). *Journal of the American Chemical Society* **1985**, *107*, 4207–4215.
- (82) Lin, C.-Y.; Guo, J.-D.; Fettinger, J. C.; Nagase, S.; Grandjean, F.; Long, G. J.; Chilton, N. F.; Power, P. P. Dispersion force stabilized two-coordinate transition metal–amido complexes of the- N (SiMe<sub>3</sub>) Dipp (Dipp= C<sub>6</sub>H<sub>3</sub>-2, 6-Pri<sub>2</sub>) ligand: Structural, spectroscopic, magnetic, and computational studies. *Inorganic Chemistry* **2013**, *52*, 13584–13593.
- (83) Konarev, D. V.; Ishikawa, M.; Khasanov, S. S.; Otsuka, A.; Yamochi, H.; Saito, G.; Lyubovskaya, R. N. Synthesis, Structural and Magnetic Properties of Ternary Complexes of (Me<sub>4</sub>P<sup>+</sup>)·{[Fe (I) Pc (- 2)]<sup>-</sup>}· Triptycene and (Me<sub>4</sub>P<sup>+</sup>)·{[Fe (I) Pc (- 2)]<sup>-</sup>}·(N, N, N', N'-Tetrabenzyl-p-phenylenediamine) 0.5 with Iron (I) Phthalocyanine Anions. *Inorganic Chemistry* **2013**, *52*, 3851–3859.
- (84) Nachtigallová, D.; Antalík, A.; Lo, R.; Sedlák, R.; Manna, D.; Tuček, J.; Ugolotti, J.; Veis, L.; Legeza, Ö.; Pittner, J.; others An Isolated Molecule of Iron (II) Phthalocyanin Exhibits Quintet Ground-State: A Nexus between Theory and Experiment. *Chemistry–A European Journal* **2018**, *24*, 13413–13417.
- (85) Liu, Y.-Z.; Wang, J.; Zhao, Y.; Chen, L.; Chen, X.-T.; Xue, Z.-L. Four-coordinate Co (ii) and Fe (ii) complexes with bis (N-heterocyclic carbene) borate and their magnetic properties. *Dalton Transactions* **2015**, *44*, 908–911.
- (86) Cook, B. J.; Polezhaev, A. V.; Chen, C.-H.; Pink, M.; Caulton, K. G. Deprotonation, Chloride Abstraction, and Dehydrohalogenation as Synthetic Routes to Bis-Pyrazolate Pyridyl Iron (II) Complexes. *European Journal of Inorganic Chemistry* **2017**, *2017*, 3999–4012.
- (87) Sheu, C.-F.; Pillet, S.; Lin, Y.-C.; Chen, S.-M.; Hsu, I.-J.; Lecomte, C.; Wang, Y.

- Magnetostructural relationship in the spin-crossover complex  $t\text{-}\{\text{Fe}(\text{abpt})_2[\text{N}(\text{CN})_2]_2\}$ : Polymorphism and disorder phenomenon. *Inorganic chemistry* **2008**, *47*, 10866–10874.
- (88) Supej, M. J.; Volkov, A.; Darko, L.; West, R. A.; Darmon, J. M.; Schulz, C. E.; Wheeler, K. A.; Hoyt, H. M. Aryl-substituted BIAN complexes of iron dibromide: Synthesis, X-ray and electronic structure, and catalytic hydrosilylation activity. *Polyhedron* **2016**, *114*, 403–414.
- (89) Ott, J. C.; Wadepohl, H.; Enders, M.; Gade, L. H. Taking solution proton NMR to its extreme: prediction and detection of a hydride resonance in an intermediate-spin iron complex. *Journal of the American Chemical Society* **2018**, *140*, 17413–17417.
- (90) Sheu, C.-F.; Shih, C.-H.; Sugimoto, K.; Cheng, B.-M.; Takata, M.; Wang, Y. A long-lived photo-induced metastable state of linkage isomerization accompanied with a spin transition. *Chemical communications* **2012**, *48*, 5715–5717.
- (91) Weber, B.; Jäger, E.-G. Magnetic Ordering in Iron (II) Complexes due to a 2D Network of Hydrogen Bonds. *Zeitschrift für anorganische und allgemeine Chemie* **2009**, *635*, 130–133.
- (92) Irwin, M.; Jenkins, R. K.; Denning, M. S.; Kramer, T.; Grandjean, F.; Long, G. J.; Herchel, R.; McGrady, J. E.; Goicoechea, J. M. Experimental and computational study of the structural and electronic properties of  $\text{FeII}(2, 2'\text{-bipyridine})(\text{mes})_2$  and  $[\text{FeII}(2, 2'\text{-bipyridine})(\text{mes})_2]^-$ , a complex containing a 2, 2'-bipyridyl radical anion. *Inorganic chemistry* **2010**, *49*, 6160–6171.
- (93) Lin, P.-H.; Smythe, N. C.; Gorelsky, S. I.; Maguire, S.; Henson, N. J.; Korobkov, I.; Scott, B. L.; Gordon, J. C.; Baker, R. T.; Murugesu, M. Importance of out-of-state spin-orbit coupling for slow magnetic relaxation in mononuclear  $\text{FeII}$  complexes. *Journal of the American Chemical Society* **2011**, *133*, 15806–15809.

- (94) Dub, P. A.; Scott, B. L.; Gordon, J. C. First-row transition metal complexes of ENENES ligands: the ability of the thioether donor to impact the coordination chemistry. *Dalton Transactions* **2016**, *45*, 1560–1571.
- (95) Musgrave, R. A.; Turbervill, R. S.; Irwin, M.; Herchel, R.; Goicoechea, J. M. Iron (II) complexes of ditopic carbanionic carbenes. *Dalton Transactions* **2014**, *43*, 4335–4344.
- (96) Leung, W.-P.; Lee, H. K.; Weng, L.-H.; Luo, B.-S.; Zhou, Z.-Y.; Mak, T. C. Synthesis and Structures of Iron (II) Alkyl and Thiolate Compounds Containing Sterically Hindered N-Functionalized Alkyl Ligands. *Organometallics* **1996**, *15*, 1785–1792.
- (97) Yang, F.; Zhou, Q.; Zhang, Y.; Zeng, G.; Li, G.; Shi, Z.; Wang, B.; Feng, S. Inspiration from old molecules: field-induced slow magnetic relaxation in three air-stable tetrahedral cobalt (II) compounds. *Chemical communications* **2013**, *49*, 5289–5291.
- (98) Titiš, J.; Miklovič, J.; Boča, R. Magnetostructural study of tetracoordinate cobalt (II) complexes. *Inorganic Chemistry Communications* **2013**, *35*, 72–75.
- (99) Shapiro, I. R.; Jenkins, D. M.; Thomas, J. C.; Day, M. W.; Peters, J. C. A homoleptic phosphine adduct of Tl (i) Electronic supplementary information (ESI) available: <sup>31</sup>P and <sup>205</sup>Tl NMR spectra of [PhBP3] Tl in C<sub>6</sub>D<sub>6</sub>. See <http://www.rsc.org/suppdata/cc/b1/b104447h>. *Chemical Communications* **2001**, 2152–2153.
- (100) Mondal, A. K.; Sundararajan, M.; Konar, S. A new series of tetrahedral Co (ii) complexes [CoLX<sub>2</sub>](X= NCS, Cl, Br, I) manifesting single-ion magnet features. *Dalton Transactions* **2018**, *47*, 3745–3754.
- (101) Habib, F.; Luca, O. R.; Vieru, V.; Shiddiq, M.; Korobkov, I.; Gorelsky, S. I.; Takase, M. K.; Chibotaru, L. F.; Hill, S.; Crabtree, R. H.; others Influence of the ligand field on slow magnetization relaxation versus spin crossover in mononuclear cobalt complexes. *Angewandte Chemie International Edition* **2013**, *52*, 11290–11293.

- (102) Li, J.-X.; Du, Z.-X.; Wang, L.-Z.; Huang, W.-P. Cobalt and cadmium complexes with N-heterocyclic dicarboxylic acid ligands: syntheses, structures, magnetic and fluorescent properties. *Inorganica Chimica Acta* **2011**, *376*, 479–485.
- (103) Idešicová, M.; Dlháň, L.; Moncol', J.; Titiš, J.; Boča, R. Zero-field splitting in tetra-coordinate Co (II) complexes. *Polyhedron* **2012**, *36*, 79–84.
- (104) Titiš, J.; Hudák, J.; Kožíšek, J.; Krutošíková, A.; Moncol, J.; Tarabová, D.; Boča, R. Structural, spectral and magnetic properties of carboxylato cobalt (II) complexes with heterocyclic N-donor ligands: Reconstruction of magnetic parameters from electronic spectra. *Inorganica Chimica Acta* **2012**, *388*, 106–113.
- (105) Lee, H.; Mak, T. W.; others Synthesis and structural characterisation of mono- and bi-nuclear cobalt (II) alkyls. *Journal of the Chemical Society, Dalton Transactions* **1997**, 779–784.
- (106) Sokolov, F. D.; Zabiroy, N. G.; Yamalieva, L. N.; Shtyrlin, V. G.; Garipov, R. R.; Brusko, V. V.; Verat, A. Y.; Baranov, S. V.; Mlynarz, P.; Glowiak, T.; others Coordination diversity of N-phosphoryl-N'-phenylthiourea (LH) towards CoII, NiII and PdII cations: Crystal structure of ML<sub>2</sub>-N, S and ML<sub>2</sub>-O, S chelates. *Inorganica chimica acta* **2006**, *359*, 2087–2096.
- (107) Safin, D. A.; Mlynarz, P.; Hahn, F. E.; Babashkina, M. G.; Sokolov, F. D.; Zabiroy, N. G.; Galezowska, J.; Kozłowski, H. Cobalt (II) Complexes with N-Thioacylamidophosphates and 2, 2'-Bipyridyl and 1, 10-Phenathroline. Crystal Structures, Solution <sup>1</sup>H NMR Spectral and Magnetic Properties. *Zeitschrift für anorganische und allgemeine Chemie* **2007**, *633*, 1472–1479.
- (108) Khrizanforova, V. V.; Fayzullin, R. R.; Bogomyakov, A. S.; Morozov, V. I.; Batulin, R. G.; Gerasimova, T. P.; Islamov, D. R.; Budnikova, Y. H. Cobalt (ii) coordi-

- nation to an N 4-acenaphthene-based ligand and its sodium complex. *Dalton Transactions* **2023**, *52*, 7876–7884.
- (109) Krest, A.; Sandleben, A.; Valldor, M.; Werker, M.; Ruschewitz, U.; Klein, A. Heteroleptic Complexes of the Tridentate Pyridine-2, 6-di-tetrazolate Ligand. *Chemistry-Select* **2017**, *2*, 5849–5859.
- (110) Stevens, E. D. Electronic structure of metalloporphyrins. 1. Experimental electron density distribution of (meso-tetraphenylporphinato) cobalt (II). *Journal of the American Chemical Society* **1981**, *103*, 5087–5095.
- (111) Mamardashvili, G.; Kaigorodova, E.; Simonova, O.; Mamardashvili, N. Influence of the macrocycle structure on the ability of Co (II)-porphyrins to oxidize in the presence of organic bases. *Journal of Coordination Chemistry* **2018**, *71*, 4194–4209.
- (112) Smith, M. E.; Andersen, R. A. Me<sub>5</sub>C<sub>5</sub>Ni (acac): a monomeric, paramagnetic, 18-electron, spin-equilibrium molecule. *Journal of the American Chemical Society* **1996**, *118*, 11119–11128.
- (113) Zhu, D.; Janssen, F. F.; Budzelaar, P. H. (Py)<sub>2</sub>Co(CH<sub>2</sub>SiMe<sub>3</sub>)<sub>2</sub> As an Easily Accessible Source of “CoR<sub>2</sub>”. *Organometallics* **2010**, *29*, 1897–1908.
- (114) Żurowska, B.; Brzuszkiewicz, A. Co (II)-promoted transformation of diethyl (quinolin-2-ylmethyl) phosphonate to quinoline-2-carboxylate (2-qca): Synthetic, structural and magnetic studies of [Co (2-qca)<sub>2</sub> (EtOH)<sub>2</sub>]. *Polyhedron* **2008**, *27*, 1623–1630.
- (115) Legrand, Y.-M.; van der Lee, A.; Masquelez, N.; Rabu, P.; Barboiu, M. Temperature induced single-crystal-to-single-crystal transformations and structure directed effects on magnetic properties. *Inorganic chemistry* **2007**, *46*, 9083–9089.
- (116) Kershaw Cook, L. J.; Kulmaczewski, R.; Mohammed, R.; Dudley, S.; Barrett, S. A.; Little, M. A.; Deeth, R. J.; Halcrow, M. A. A unified treatment of the relationship be-

- tween ligand substituents and spin state in a family of iron (II) complexes. *Angewandte Chemie* **2016**, *128*, 4399–4403.
- (117) Scarborough, C. C.; Sproules, S.; Doonan, C. J.; Hagen, K. S.; Weyhermuller, T.; Wieghardt, K. Scrutinizing low-spin Cr (II) complexes. *Inorganic Chemistry* **2012**, *51*, 6969–6982.
- (118) Addison, A. W.; Rao, T. N.; Reedijk, J.; van Rijn, J.; Verschoor, G. C. Synthesis, structure, and spectroscopic properties of copper (II) compounds containing nitrogen–sulphur donor ligands; the crystal and molecular structure of aqua [1, 7-bis (N-methylbenzimidazol-2-yl)-2, 6-dithiaheptane] copper (II) perchlorate. *Journal of the Chemical Society, Dalton Transactions* **1984**, 1349–1356.
- (119) Alessandro Bencini, D. G., Cristiano Benelli The angular overlap model for the description of the paramagnetic properties of transition metal complexes. *Coordination Chemistry Reviews* **1984**, *60*, 131–169.
- (120) Peng He, M.-Y. H. Y.-J. Z. M.-Y. H., Mu-Han Guan; Zhu, S.-F. Iron-Catalyzed Allylic C(sp<sup>3</sup>) H Silylation: Spin-Crossover Efficiency-Determined Chemoselectivity. *Angewandte Chemie* **2024**, *63*.
- (121) Yafei Jiang, Q. M.-H. T. X. L. G. C., Xiaotong Zhang; Jia, Z. A theoretical study on oxidative cleavage of olefins to carbonyls catalysed by Fe(III)-PyBisulidine. *Dalton Transactions* **2017**, *46*, 3825–3832.
